# Supplementary material for: In-Vivo Expression Profiling of Pseudomonas aeruginosa Infections Reveals Niche-Specific and Strain-Independent Transcriptional Programs
Source: PubMed Central journal article supplement (PMC3171414; doi:10.1371/journal.pone.0024235), 2011-09-12
Supplement: pone.0024235.s001.pdf [file pone.0024235.s001.pdf]

Table S1

| Strain:    | Beta lactams |                      |               |                         |                |               |                   |           |             |            |             |          | Aminoglycosydes | Quinolones |          | Glycyclines | Sulfonamides |            |           |   |
|------------|--------------|----------------------|---------------|-------------------------|----------------|---------------|-------------------|-----------|-------------|------------|-------------|----------|-----------------|------------|----------|-------------|--------------|------------|-----------|---|
|            | Penicillins  |                      |               |                         | Cephalosporins |               |                   |           |             |            |             |          |                 |            |          |             |              | Carbapenem |           |   |
|            | Ampicilin    | Ampicillin/Sublactam | Piperacillin  | Piperacillin/Tazobactam | Cefazolin      | Cefuroxime    | Cefuroxime Axetil | Cefoxitin | Cefpodoxime | Cefotaxime | Ceftazidime | Cefepime |                 |            |          |             |              |            | Meropenem |   |
| Gentamycin | Tobramycin   | Nalidixic Acid       | Ciprofloxacin | Levofloxacin            | Tigecycline    | Trimethoprim* |                   |           |             |            |             |          |                 |            |          |             |              |            |           |   |
| PAO1       | R            | R                    | S             | S                       | R              | R             | R                 | R         | R           | I          | I           | S        | S               | S          | S        | R           | I            | I          | R         | R |
| PA14       | R            | R                    | S             | S                       | R              | R             | R                 | R         | R           | I          | I           | S        | S               | S          | S        | R           | S            | S          | R         | I |
| PBCLOp10   | R            | R                    | R             | R                       | R              | R             | R                 | R         | R           | R          | I           | I        | R               | R          | R        | R           | S            | S          | R         | R |
| PBCLOp11   | R            | R                    | S             | S                       | R              | R             | R                 | R         | R           | R          | I           | I        | S               | I          | S        | R           | <b>R</b>     | I          | R         | R |
| PBCLOp17   | R            | R                    | <b>R</b>      | <b>R</b>                | R              | R             | R                 | R         | R           | R          | <b>R</b>    | <b>R</b> | S               | <b>R</b>   | <b>R</b> | R           | <b>R</b>     | <b>R</b>   | R         | R |

\*Full name: Trimethoprim/Sulfamethoxazole
