# Supplementary material for: In-Vivo Expression Profiling of Pseudomonas aeruginosa Infections Reveals Niche-Specific and Strain-Independent Transcriptional Programs
Source: PubMed Central journal article supplement (PMC3171414; doi:10.1371/journal.pone.0024235), 2011-09-12
Supplement: pone.0024235.s002.pdf [file pone.0024235.s002.pdf]

Table S2

| Locus ID | Gene name   | Product name                              |
|----------|-------------|-------------------------------------------|
| PA0059   | <i>osmC</i> | osmotically inducible protein OsmC        |
| PA0060   |             | conserved hypothetical protein            |
| PA0102   |             | probable carbonic anhydrase               |
| PA0104   |             | hypothetical protein                      |
| PA0266   | <i>gabT</i> | 4-aminobutyrate aminotransferase          |
| PA0320   |             | conserved hypothetical protein            |
| PA0354   |             | conserved hypothetical protein            |
| PA0355   | <i>pfpI</i> | protease PfpI                             |
| PA0376   | <i>rpoH</i> | sigma factor RpoH                         |
| PA0423   | <i>pasP</i> | PasP                                      |
| PA0532   |             | hypothetical protein                      |
| PA0553   |             | hypothetical protein                      |
| PA0567   |             | conserved hypothetical protein            |
| PA0672   | <i>hemO</i> | heme oxygenase                            |
| PA0707   | <i>toxR</i> | transcriptional regulator ToxR            |
| PA0763   | <i>mucA</i> | anti-sigma factor MucA                    |
| PA0779   |             | probable ATP-dependent protease           |
| PA1134   |             | hypothetical protein                      |
| PA1245   |             | hypothetical protein                      |
| PA1320   | <i>cyoD</i> | cytochrome o ubiquinol oxidase subunit IV |
| PA1323   |             | hypothetical protein                      |
| PA1324   |             | hypothetical protein                      |
| PA1500   |             | probable oxidoreductase                   |
| PA1515   | <i>alc</i>  | allantoicase                              |
| PA1518   |             | conserved hypothetical protein            |
| PA1579   |             | hypothetical protein                      |
| PA1596   | <i>htpG</i> | heat shock protein HtpG                   |
| PA1870   |             | hypothetical protein                      |
| PA1925   |             | hypothetical protein                      |
| PA2000   |             | probable CoA transferase, subunit B       |
| PA2033   |             | hypothetical protein                      |
| PA2034   |             | hypothetical protein                      |
| PA2108   |             | probable decarboxylase                    |
| PA2116   |             | conserved hypothetical protein            |
| PA2134   |             | hypothetical protein                      |
| PA2135   |             | probable transporter                      |
| PA2140   |             | probable metallothionein                  |
| PA2141   |             | hypothetical protein                      |
| PA2142   |             | probable short-chain dehydrogenase        |
| PA2143   |             | hypothetical protein                      |
| PA2144   | <i>glgP</i> | glycogen phosphorylase                    |
| PA2145   |             | hypothetical protein                      |
| PA2146   |             | conserved hypothetical protein            |
| PA2147   | <i>katE</i> | catalase HP II                            |
| PA2148   |             | conserved hypothetical protein            |
| PA2149   |             | hypothetical protein                      |
| PA2150   |             | conserved hypothetical protein            |
| PA2151   |             | conserved hypothetical protein            |
| PA2152   |             | probable trehalose synthase               |
| PA2153   | <i>glgB</i> | 1,4-alpha-glucan branching enzyme         |

|        |              |                                                                |
|--------|--------------|----------------------------------------------------------------|
| PA2157 |              | hypothetical protein                                           |
| PA2158 |              | probable alcohol dehydrogenase (Zn-dependent)                  |
| PA2159 |              | conserved hypothetical protein                                 |
| PA2160 |              | probable glycosyl hydrolase                                    |
| PA2161 |              | hypothetical protein                                           |
| PA2164 |              | probable glycosyl hydrolase                                    |
| PA2165 |              | probable glycogen synthase                                     |
| PA2167 |              | hypothetical protein                                           |
| PA2168 |              | hypothetical protein                                           |
| PA2169 |              | hypothetical protein                                           |
| PA2170 |              | hypothetical protein                                           |
| PA2171 |              | hypothetical protein                                           |
| PA2172 |              | hypothetical protein                                           |
| PA2173 |              | hypothetical protein                                           |
| PA2176 |              | hypothetical protein                                           |
| PA2178 |              | hypothetical protein                                           |
| PA2180 |              | hypothetical protein                                           |
| PA2181 |              | hypothetical protein                                           |
| PA2182 |              | hypothetical protein                                           |
| PA2183 |              | hypothetical protein                                           |
| PA2184 |              | conserved hypothetical protein                                 |
| PA2187 |              | hypothetical protein                                           |
| PA2189 |              | hypothetical protein                                           |
| PA2190 |              | conserved hypothetical protein                                 |
| PA2192 |              | conserved hypothetical protein                                 |
| PA2383 |              | probable transcriptional regulator                             |
| PA2384 |              | hypothetical protein                                           |
| PA2385 | <i>pvdQ</i>  | 3-oxo-C12-homoserine lactone acylase PvdQ                      |
| PA2386 | <i>pvdA</i>  | L-ornithine N5-oxygenase                                       |
| PA2393 |              | probable dipeptidase precursor                                 |
| PA2394 | <i>pvdN</i>  | PvdN                                                           |
| PA2405 |              | hypothetical protein                                           |
| PA2411 |              | probable thioesterase                                          |
| PA2412 |              | conserved hypothetical protein                                 |
| PA2413 | <i>pvdH</i>  | L-2,4-diaminobutyrate:2-ketoglutarate 4-aminotransferase, PvdH |
| PA2414 |              | L-sorbose dehydrogenase                                        |
| PA2424 | <i>pvdL</i>  | PvdL                                                           |
| PA2485 |              | hypothetical protein                                           |
| PA2486 |              | hypothetical protein                                           |
| PA2634 | <i>aceA</i>  | isocitrate lyase AceA                                          |
| PA2694 |              | probable thioredoxin                                           |
| PA3041 |              | hypothetical protein                                           |
| PA3042 |              | hypothetical protein                                           |
| PA3126 | <i>ibpA</i>  | heat-shock protein IbpA                                        |
| PA3231 |              | hypothetical protein                                           |
| PA3273 |              | hypothetical protein                                           |
| PA3274 |              | hypothetical protein                                           |
| PA3283 |              | conserved hypothetical protein                                 |
| PA3407 | <i>hasAp</i> | heme acquisition protein HasAp                                 |
| PA3459 |              | probable glutamine amidotransferase                            |
| PA3460 |              | probable acetyltransferase                                     |
| PA3461 |              | conserved hypothetical protein                                 |
| PA3540 | <i>algD</i>  | GDP-mannose 6-dehydrogenase AlgD                               |

|        |              |                                                        |
|--------|--------------|--------------------------------------------------------|
| PA3541 | <i>alg8</i>  | alginate biosynthesis protein Alg8                     |
| PA3598 |              | conserved hypothetical protein                         |
| PA3600 |              | conserved hypothetical protein                         |
| PA3601 |              | conserved hypothetical protein                         |
| PA3691 |              | hypothetical protein                                   |
| PA3692 |              | probable outer membrane protein precursor              |
| PA3731 |              | conserved hypothetical protein                         |
| PA3795 |              | probable oxidoreductase                                |
| PA3811 | <i>hscB</i>  | heat shock protein HscB                                |
| PA3812 | <i>iscA</i>  | probable iron-binding protein IscA                     |
| PA3814 | <i>iscS</i>  | L-cysteine desulfurase (pyridoxal phosphate-dependent) |
| PA3891 |              | probable ATP-binding component of ABC transporter      |
| PA3951 |              | conserved hypothetical protein                         |
| PA4061 |              | probable thioredoxin                                   |
| PA4063 |              | hypothetical protein                                   |
| PA4065 |              | hypothetical protein                                   |
| PA4170 |              | hypothetical protein                                   |
| PA4171 |              | probable protease                                      |
| PA4172 |              | probable nuclease                                      |
| PA4175 | <i>piv</i>   | protease IV                                            |
| PA4344 |              | probable hydrolase                                     |
| PA4345 |              | hypothetical protein                                   |
| PA4387 |              | conserved hypothetical protein                         |
| PA4390 |              | hypothetical protein                                   |
| PA4394 |              | conserved hypothetical protein                         |
| PA4467 |              | hypothetical protein                                   |
| PA4468 | <i>sodM</i>  | superoxide dismutase                                   |
| PA4469 |              | hypothetical protein                                   |
| PA4470 | <i>fumC1</i> | fumarate hydratase                                     |
| PA4570 |              | hypothetical protein                                   |
| PA4661 | <i>pagL</i>  | Lipid A 3-O-deacylase                                  |
| PA4738 |              | conserved hypothetical protein                         |
| PA4739 |              | conserved hypothetical protein                         |
| PA4761 | <i>dnaK</i>  | DnaK protein                                           |
| PA4834 |              | hypothetical protein                                   |
| PA4835 |              | hypothetical protein                                   |
| PA4836 |              | hypothetical protein                                   |
| PA4837 |              | probable outer membrane protein precursor              |
| PA4838 |              | hypothetical protein                                   |
| PA4877 |              | hypothetical protein                                   |
| PA4896 |              | probable sigma-70 factor, ECF subfamily                |
| PA4936 |              | probable rRNA methylase                                |
| PA5053 | <i>hslV</i>  | heat shock protein HslV                                |
| PA5054 | <i>hslU</i>  | heat shock protein HslU                                |
| PA5060 | <i>phaF</i>  | polyhydroxyalkanoate synthesis protein PhaF            |
| PA5150 |              | probable short-chain dehydrogenase                     |
| PA5340 |              | hypothetical protein                                   |
| PA5388 |              | hypothetical protein                                   |
| PA5481 |              | hypothetical protein                                   |
| PA5499 | <i>np20</i>  | transcriptional regulator np20                         |
| PA5501 | <i>znuB</i>  | permease of ABC zinc transporter ZnuB                  |
| PA5534 |              | hypothetical protein                                   |
| PA5535 |              | conserved hypothetical protein                         |

|        |             |                                    |
|--------|-------------|------------------------------------|
| PA5536 |             | conserved hypothetical protein     |
| PA5537 |             | hypothetical protein               |
| PA5538 | <i>amiA</i> | N-acetylmuramoyl-L-alanine amidase |
| PA5539 |             | hypothetical protein               |
| PA5540 |             | hypothetical protein               |
| PA5541 | <i>pyrQ</i> | dihydroorotase                     |

---
