# Supplementary material for: In-Vivo Expression Profiling of Pseudomonas aeruginosa Infections Reveals Niche-Specific and Strain-Independent Transcriptional Programs
Source: PubMed Central journal article supplement (PMC3171414; doi:10.1371/journal.pone.0024235), 2011-09-12
Supplement: pone.0024235.s003.pdf [file pone.0024235.s003.pdf]

Table S3

| Locus ID | Gene name    | Product name                                       |
|----------|--------------|----------------------------------------------------|
| PA0011   |              | probable 2-OH-lauroyltransferase                   |
| PA0035   | <i>trpA</i>  | tryptophan synthase alpha chain                    |
| PA0036   | <i>trpB</i>  | tryptophan synthase beta chain                     |
| PA0201   |              | hypothetical protein                               |
| PA0226   |              | probable CoA transferase, subunit A                |
| PA0276   |              | hypothetical protein                               |
| PA0280   | <i>cysA</i>  | sulfate transport protein CysA                     |
| PA0281   | <i>cysW</i>  | sulfate transport protein CysW                     |
| PA0282   | <i>cysT</i>  | sulfate transport protein CysT                     |
| PA0283   | <i>sbp</i>   | sulfate-binding protein precursor                  |
| PA0284   |              | hypothetical protein                               |
| PA0286   | <i>desA</i>  | delta-9 fatty acid desaturase, DesA                |
| PA0296   | <i>spuI</i>  | probable glutamine synthetase                      |
| PA0298   | <i>spuB</i>  | probable glutamine synthetase                      |
| PA0385   |              | hypothetical protein                               |
| PA0386   |              | probable oxidase                                   |
| PA0436   |              | probable transcriptional regulator                 |
| PA0439   |              | probable oxidoreductase                            |
| PA0441   | <i>dht</i>   | dihydropyrimidinase                                |
| PA0444   |              | N-carbamoyl-beta-alanine amidohydrolase            |
| PA0451   |              | conserved hypothetical protein                     |
| PA0456   |              | probable cold-shock protein                        |
| PA0472   |              | probable sigma-70 factor, ECF subfamily            |
| PA0473   |              | probable glutathione S-transferase                 |
| PA0485   |              | conserved hypothetical protein                     |
| PA0505   |              | hypothetical protein                               |
| PA0547   |              | probable transcriptional regulator                 |
| PA0608   |              | probable phosphoglycolate phosphatase              |
| PA0676   |              | probable transmembrane sensor                      |
| PA0730   |              | probable transferase                               |
| PA0734   |              | hypothetical protein                               |
| PA0801   |              | hypothetical protein                               |
| PA0802   |              | hypothetical protein                               |
| PA0810   |              | probable haloacid dehalogenase                     |
| PA0814   |              | conserved hypothetical protein                     |
| PA0815   |              | probable transcriptional regulator                 |
| PA0817   |              | probable ring-cleaving dioxygenase                 |
| PA0837   | <i>slyD</i>  | peptidyl-prolyl cis-trans isomerase SlyD           |
| PA0851   |              | hypothetical protein                               |
| PA0862   |              | hypothetical protein                               |
| PA0929   |              | two-component response regulator                   |
| PA0936   | <i>lpxO2</i> | lipopolysaccharide biosynthetic protein LpxO2      |
| PA0995   | <i>ogt</i>   | methylated-DNA--protein-cysteine methyltransferase |
| PA1060   |              | hypothetical protein                               |
| PA1075   |              | hypothetical protein                               |
| PA1092   | <i>fliC</i>  | flagellin type B                                   |
| PA1101   | <i>fliF</i>  | Flagella M-ring outer membrane protein precursor   |
| PA1190   |              | conserved hypothetical protein                     |
| PA1192   |              | conserved hypothetical protein                     |

|        |              |                                                                                              |
|--------|--------------|----------------------------------------------------------------------------------------------|
| PA1296 |              | probable 2-hydroxyacid dehydrogenase                                                         |
| PA1377 |              | conserved hypothetical protein                                                               |
| PA1440 |              | hypothetical protein                                                                         |
| PA1452 | <i>flhA</i>  | flagellar biosynthesis protein FlhA                                                          |
| PA1505 | <i>moaA2</i> | molybdopterin biosynthetic protein A2                                                        |
| PA1626 |              | probable major facilitator superfamily (MFS) transporter                                     |
| PA1630 |              | probable transcriptional regulator                                                           |
| PA1632 | <i>kdpF</i>  | KdpF protein                                                                                 |
| PA1651 |              | probable transporter                                                                         |
| PA1676 |              | hypothetical protein                                                                         |
| PA1677 |              | conserved hypothetical protein                                                               |
| PA1730 |              | conserved hypothetical protein                                                               |
| PA1775 | <i>cmpX</i>  | conserved cytoplasmic membrane protein, CmpX protein                                         |
| PA1776 | <i>sigX</i>  | ECF sigma factor SigX                                                                        |
| PA1778 | <i>cobA</i>  | uroporphyrin-III C-methyltransferase                                                         |
| PA1779 |              | assimilatory nitrate reductase                                                               |
| PA1780 | <i>nirD</i>  | assimilatory nitrite reductase small subunit                                                 |
| PA1781 | <i>nirB</i>  | assimilatory nitrite reductase large subunit                                                 |
| PA1782 |              | probable serine/threonine-protein kinase                                                     |
| PA1783 | <i>nasA</i>  | nitrate transporter                                                                          |
| PA1800 | <i>tig</i>   | trigger factor                                                                               |
| PA1814 |              | hypothetical protein                                                                         |
| PA1837 |              | hypothetical protein                                                                         |
| PA1838 | <i>cysI</i>  | sulfite reductase                                                                            |
| PA1856 |              | probable cytochrome oxidase subunit                                                          |
| PA1927 | <i>metE</i>  | 5-methyltetrahydropteroyltriglutamate-homocysteine S-methyltransferase                       |
| PA1950 | <i>rbsK</i>  | ribokinase                                                                                   |
| PA1963 |              | hypothetical protein                                                                         |
| PA1984 |              | probable aldehyde dehydrogenase                                                              |
| PA1998 |              | probable transcriptional regulator                                                           |
| PA2019 |              | Resistance-Nodulation-Cell Division (RND) multidrug efflux membrane fusion protein precursor |
| PA2030 |              | hypothetical protein                                                                         |
| PA2031 |              | hypothetical protein                                                                         |
| PA2045 |              | conserved hypothetical protein                                                               |
| PA2092 |              | probable major facilitator superfamily (MFS) transporter                                     |
| PA2229 |              | conserved hypothetical protein                                                               |
| PA2259 | <i>ptxS</i>  | transcriptional regulator PtxS                                                               |
| PA2260 |              | hypothetical protein                                                                         |
| PA2261 |              | probable 2-ketogluconate kinase                                                              |
| PA2263 |              | probable 2-hydroxyacid dehydrogenase                                                         |
| PA2306 |              | conserved hypothetical protein                                                               |
| PA2322 |              | gluconate permease                                                                           |
| PA2380 |              | hypothetical protein                                                                         |
| PA2484 |              | conserved hypothetical protein                                                               |
| PA2491 |              | probable oxidoreductase                                                                      |
| PA2519 | <i>xylS</i>  | transcriptional regulator XylS                                                               |
| PA2560 |              | hypothetical protein                                                                         |
| PA2570 | <i>lecA</i>  | LecA                                                                                         |
| PA2582 |              | hypothetical protein                                                                         |
| PA2662 |              | conserved hypothetical protein                                                               |
| PA2663 |              | hypothetical protein                                                                         |
| PA2664 | <i>fhp</i>   | flavoheмоprotein                                                                             |

|        |              |                                                             |
|--------|--------------|-------------------------------------------------------------|
| PA2710 |              | hypothetical protein                                        |
| PA2718 |              | probable transcriptional regulator                          |
| PA2743 | <i>infC</i>  | translation initiation factor IF-3                          |
| PA2746 |              | hypothetical protein                                        |
| PA2759 |              | hypothetical protein                                        |
| PA2786 |              | hypothetical protein                                        |
| PA2844 |              | conserved hypothetical protein                              |
| PA2847 |              | conserved hypothetical protein                              |
| PA2876 | <i>pyrF</i>  | orotidine 5'-phosphate decarboxylase                        |
| PA2906 |              | probable oxidoreductase                                     |
| PA2950 |              | hypothetical protein                                        |
| PA2985 |              | hypothetical protein                                        |
| PA3009 |              | hypothetical protein                                        |
| PA3010 |              | hypothetical protein                                        |
| PA3034 |              | probable transcriptional regulator                          |
| PA3167 | <i>serC</i>  | 3-phosphoserine aminotransferase                            |
| PA3168 | <i>gyrA</i>  | DNA gyrase subunit A                                        |
| PA3178 |              | hypothetical protein                                        |
| PA3182 | <i>pgl</i>   | 6-phosphogluconolactonase                                   |
| PA3183 | <i>zwf</i>   | glucose-6-phosphate 1-dehydrogenase                         |
| PA3195 | <i>gapA</i>  | glyceraldehyde 3-phosphate dehydrogenase                    |
| PA3266 | <i>capB</i>  | cold acclimation protein B                                  |
| PA3285 |              | probable sigma-70 factor, ECF subfamily                     |
| PA3354 |              | hypothetical protein                                        |
| PA3417 |              | probable pyruvate dehydrogenase E1 component, alpha subunit |
| PA3436 |              | hypothetical protein                                        |
| PA3450 |              | probable antioxidant protein                                |
| PA3473 |              | hypothetical protein                                        |
| PA3533 |              | conserved hypothetical protein                              |
| PA3536 |              | hypothetical protein                                        |
| PA3576 |              | hypothetical protein                                        |
| PA3578 |              | conserved hypothetical protein                              |
| PA3668 |              | conserved hypothetical protein                              |
| PA3720 |              | hypothetical protein                                        |
| PA3726 |              | conserved hypothetical protein                              |
| PA3744 | <i>rimM</i>  | 16S rRNA processing protein                                 |
| PA3754 |              | hypothetical protein                                        |
| PA3756 |              | hypothetical protein                                        |
| PA3796 |              | hypothetical protein                                        |
| PA3808 |              | conserved hypothetical protein                              |
| PA3813 | <i>iscU</i>  | probable iron-binding protein IscU                          |
| PA3817 |              | probable methyltransferase                                  |
| PA3844 |              | hypothetical protein                                        |
| PA3899 |              | probable sigma-70 factor, ECF subfamily                     |
| PA3914 | <i>moeA1</i> | molybdenum cofactor biosynthetic protein A1                 |
| PA3915 | <i>moaB1</i> | molybdopterin biosynthetic protein B1                       |
| PA3918 | <i>moaC</i>  | molybdopterin biosynthetic protein C                        |
| PA4007 | <i>proA</i>  | gamma-glutamyl phosphate reductase                          |
| PA4014 |              | hypothetical protein                                        |
| PA4021 |              | probable transcriptional regulator                          |
| PA4026 |              | probable acetyltransferase                                  |
| PA4029 |              | conserved hypothetical protein                              |
| PA4034 | <i>aqpZ</i>  | aquaporin Z                                                 |

|        |              |                                                |
|--------|--------------|------------------------------------------------|
| PA4044 | <i>dxs</i>   | 1-deoxyxylulose-5-phosphate synthase           |
| PA4045 |              | conserved hypothetical protein                 |
| PA4046 |              | hypothetical protein                           |
| PA4051 | <i>thiL</i>  | thiamine monophosphate kinase                  |
| PA4069 |              | hypothetical protein                           |
| PA4147 | <i>acoR</i>  | transcriptional regulator AcoR                 |
| PA4176 | <i>ppiC2</i> | peptidyl-prolyl cis-trans isomerase C2         |
| PA4245 | <i>rpmD</i>  | 50S ribosomal protein L30                      |
| PA4248 | <i>rplF</i>  | 50S ribosomal protein L6                       |
| PA4262 | <i>rplD</i>  | 50S ribosomal protein L4                       |
| PA4263 | <i>rplC</i>  | 50S ribosomal protein L3                       |
| PA4293 | <i>pprA</i>  | two-component sensor PprA                      |
| PA4326 |              | hypothetical protein                           |
| PA4379 |              | conserved hypothetical protein                 |
| PA4442 | <i>cysN</i>  | ATP sulfurylase GTP-binding subunit/APS kinase |
| PA4443 | <i>cysD</i>  | ATP sulfurylase small subunit                  |
| PA4544 | <i>rluD</i>  | pseudouridine synthase                         |
| PA4567 | <i>rpmA</i>  | 50S ribosomal protein L27                      |
| PA4575 |              | hypothetical protein                           |
| PA4602 | <i>glyA3</i> | serine hydroxymethyltransferase                |
| PA4630 |              | hypothetical protein                           |
| PA4637 |              | hypothetical protein                           |
| PA4666 | <i>hemA</i>  | glutamyl-tRNA reductase                        |
| PA4726 | <i>cbrB</i>  | two-component response regulator CbrB          |
| PA4742 | <i>truB</i>  | tRNA pseudouridine 55 synthase                 |
| PA4748 | <i>tpiA</i>  | triosephosphate isomerase                      |
| PA4750 | <i>folP</i>  | dihydropteroate synthase                       |
| PA4758 | <i>carA</i>  | carbamoyl-phosphate synthase small chain       |
| PA4780 |              | conserved hypothetical protein                 |
| PA4852 |              | conserved hypothetical protein                 |
| PA4859 |              | probable permease of ABC transporter           |
| PA4870 |              | conserved hypothetical protein                 |
| PA4881 |              | hypothetical protein                           |
| PA4933 |              | hypothetical protein                           |
| PA4939 |              | conserved hypothetical protein                 |
| PA4940 |              | conserved hypothetical protein                 |
| PA5028 |              | conserved hypothetical protein                 |
| PA5048 |              | probable nuclease                              |
| PA5176 |              | conserved hypothetical protein                 |
| PA5249 |              | hypothetical protein                           |
| PA5287 | <i>amtB</i>  | ammonium transporter AmtB                      |
| PA5288 | <i>glnK</i>  | nitrogen regulatory protein P-II 2             |
| PA5295 |              | hypothetical protein                           |
| PA5298 |              | xanthine phosphoribosyltransferase             |
| PA5337 | <i>rpoZ</i>  | RNA polymerase omega subunit                   |
| PA5346 | <i>sadB</i>  | SadB                                           |
| PA5380 | <i>gbdR</i>  | GbdR                                           |
| PA5383 |              | conserved hypothetical protein                 |
| PA5438 |              | probable transcriptional regulator             |
| PA5446 |              | hypothetical protein                           |
| PA5460 |              | hypothetical protein                           |
| PA5468 |              | probable citrate transporter                   |
| PA5504 |              | D-methionine ABC transporter membrane protein  |

---
