# Supplementary material for: In-Vivo Expression Profiling of Pseudomonas aeruginosa Infections Reveals Niche-Specific and Strain-Independent Transcriptional Programs
Source: PubMed Central journal article supplement (PMC3171414; doi:10.1371/journal.pone.0024235), 2011-09-12
Supplement: pone.0024235.s004.pdf [file pone.0024235.s004.pdf]

Table S4

| Locus ID | Gene name   | Product name                                             |
|----------|-------------|----------------------------------------------------------|
| PA0044   | <i>exoT</i> | exoenzyme T                                              |
| PA0046   |             | hypothetical protein                                     |
| PA0067   | <i>prlC</i> | oligopeptidase A                                         |
| PA0093   |             | hypothetical protein                                     |
| PA0132   |             | beta-alanine--pyruvate transaminase                      |
| PA0141   |             | conserved hypothetical protein                           |
| PA0396   | <i>pilU</i> | twitching motility protein PilU                          |
| PA0415   | <i>chpC</i> | probable chemotaxis protein                              |
| PA0442   |             | hypothetical protein                                     |
| PA0510   |             | probable uroporphyrin-III c-methyltransferase            |
| PA0517   | <i>nirC</i> | probable c-type cytochrome precursor                     |
| PA0518   | <i>nirM</i> | cytochrome c-551 precursor                               |
| PA0519   | <i>nirS</i> | nitrite reductase precursor                              |
| PA0534   |             | conserved hypothetical protein                           |
| PA0545   |             | hypothetical protein                                     |
| PA0572   |             | hypothetical protein                                     |
| PA0713   |             | hypothetical protein                                     |
| PA0715   |             | hypothetical protein                                     |
| PA0716   |             | hypothetical protein                                     |
| PA0781   |             | hypothetical protein                                     |
| PA0822   |             | hypothetical protein                                     |
| PA0835   | <i>pta</i>  | phosphate acetyltransferase                              |
| PA0836   | <i>ackA</i> | acetate kinase                                           |
| PA0864   |             | probable transcriptional regulator                       |
| PA0874   |             | hypothetical protein                                     |
| PA0952   |             | hypothetical protein                                     |
| PA0962   |             | probable dna-binding stress protein                      |
| PA0977   |             | hypothetical protein                                     |
| PA0985   |             | pyocin S5                                                |
| PA1029   |             | hypothetical protein                                     |
| PA1126   |             | hypothetical protein                                     |
| PA1127   |             | probable oxidoreductase                                  |
| PA1131   |             | probable major facilitator superfamily (MFS) transporter |
| PA1195   |             | hypothetical protein                                     |
| PA1329   |             | conserved hypothetical protein                           |
| PA1337   | <i>ansB</i> | glutaminase-asparaginase                                 |
| PA1369   |             | hypothetical protein                                     |
| PA1370   |             | hypothetical protein                                     |
| PA1371   |             | hypothetical protein                                     |
| PA1372   |             | hypothetical protein                                     |
| PA1388   |             | hypothetical protein                                     |
| PA1429   |             | probable cation-transporting P-type ATPase               |
| PA1555   |             | probable cytochrome c                                    |
| PA1557   |             | probable cytochrome oxidase subunit (cbb3-type)          |
| PA1664   |             | hypothetical protein                                     |
| PA1673   |             | hypothetical protein                                     |
| PA1692   |             | probable translocation protein in type III secretion     |
| PA1696   | <i>pscO</i> | translocation protein in type III secretion              |
| PA1699   |             | conserved hypothetical protein in type III secretion     |
| PA1700   |             | conserved hypothetical protein in type III secretion     |
| PA1701   |             | conserved hypothetical protein in type III secretion     |
| PA1706   | <i>pcrV</i> | type III secretion protein PerV                          |

|        |              |                                                          |
|--------|--------------|----------------------------------------------------------|
| PA1707 | <i>pcrH</i>  | regulatory protein PcrH                                  |
| PA1708 | <i>popB</i>  | translocator protein PopB                                |
| PA1709 | <i>popD</i>  | Translocator outer membrane protein PopD precursor       |
| PA1711 | <i>exsE</i>  | ExsE                                                     |
| PA1714 | <i>exsD</i>  | ExsD                                                     |
| PA1715 | <i>pscB</i>  | type III export apparatus protein                        |
| PA1716 | <i>pscC</i>  | Type III secretion outer membrane protein PscC precursor |
| PA1717 | <i>pscD</i>  | type III export protein PscD                             |
| PA1718 | <i>pscE</i>  | type III export protein PscE                             |
| PA1719 | <i>pscF</i>  | type III export protein PscF                             |
| PA1720 | <i>pscG</i>  | type III export protein PscG                             |
| PA1721 | <i>pscH</i>  | type III export protein PscH                             |
| PA1722 | <i>pscI</i>  | type III export protein PscI                             |
| PA1723 | <i>pscJ</i>  | type III export protein PscJ                             |
| PA1724 | <i>pscK</i>  | type III export protein PscK                             |
| PA1734 |              | hypothetical protein                                     |
| PA1746 |              | hypothetical protein                                     |
| PA1789 |              | hypothetical protein                                     |
| PA1869 |              | probable acyl carrier protein                            |
| PA1901 | <i>phzC2</i> | phenazine biosynthesis protein PhzC                      |
| PA1904 | <i>phzF2</i> | probable phenazine biosynthesis protein                  |
| PA1934 |              | hypothetical protein                                     |
| PA2037 |              | hypothetical protein                                     |
| PA2102 |              | hypothetical protein                                     |
| PA2119 |              | alcohol dehydrogenase (Zn-dependent)                     |
| PA2127 |              | conserved hypothetical protein                           |
| PA2128 | <i>cupA1</i> | fimbrial subunit CupA1                                   |
| PA2186 |              | hypothetical protein                                     |
| PA2191 | <i>exoY</i>  | adenylate cyclase ExoY                                   |
| PA2392 | <i>pvdP</i>  | PvdP                                                     |
| PA2436 |              | hypothetical protein                                     |
| PA2460 |              | hypothetical protein                                     |
| PA2461 |              | hypothetical protein                                     |
| PA2576 |              | hypothetical protein                                     |
| PA2730 |              | hypothetical protein                                     |
| PA2733 |              | conserved hypothetical protein                           |
| PA2734 |              | hypothetical protein                                     |
| PA2753 |              | hypothetical protein                                     |
| PA2819 |              | hypothetical protein                                     |
| PA2825 |              | probable transcriptional regulator                       |
| PA2826 |              | probable glutathione peroxidase                          |
| PA2931 | <i>cifR</i>  | CifR                                                     |
| PA3115 | <i>fimV</i>  | Motility protein FimV                                    |
| PA3140 |              | hypothetical protein                                     |
| PA3144 |              | hypothetical protein                                     |
| PA3147 | <i>wbpJ</i>  | probable glycosyl transferase WbpJ                       |
| PA3148 | <i>wbpI</i>  | probable UDP-N-acetylglucosamine 2-epimerase WbpI        |
| PA3149 | <i>wbpH</i>  | probable glycosyltransferase WbpH                        |
| PA3150 | <i>wbpG</i>  | LPS biosynthesis protein WbpG                            |
| PA3151 | <i>hisF2</i> | imidazoleglycerol-phosphate synthase, cyclase subunit    |
| PA3152 | <i>hisH2</i> | glutamine amidotransferase                               |
| PA3154 | <i>wzy</i>   | B-band O-antigen polymerase                              |
| PA3155 | <i>wbpE</i>  | probable aminotransferase WbpE                           |
| PA3156 | <i>wbpD</i>  | probable acetyltransferase WbpD                          |
| PA3157 |              | probable acetyltransferase                               |

|        |              |                                                     |
|--------|--------------|-----------------------------------------------------|
| PA3159 | <i>wbpA</i>  | probable UDP-glucose/GDP-mannose dehydrogenase WbpA |
| PA3160 | <i>wzz</i>   | O-antigen chain length regulator                    |
| PA3161 | <i>himD</i>  | integration host factor beta subunit                |
| PA3278 |              | hypothetical protein                                |
| PA3291 |              | hypothetical protein                                |
| PA3309 |              | conserved hypothetical protein                      |
| PA3337 | <i>rfaD</i>  | ADP-L-glycero-D-mannoheptose 6-epimerase            |
| PA3431 |              | conserved hypothetical protein                      |
| PA3432 |              | hypothetical protein                                |
| PA3458 |              | probable transcriptional regulator                  |
| PA3520 |              | hypothetical protein                                |
| PA3529 |              | probable peroxidase                                 |
| PA3572 |              | hypothetical protein                                |
| PA3613 |              | hypothetical protein                                |
| PA3615 |              | hypothetical protein                                |
| PA3841 | <i>exoS</i>  | exoenzyme S                                         |
| PA3842 |              | probable chaperone                                  |
| PA3866 |              | pyocin protein                                      |
| PA3880 |              | conserved hypothetical protein                      |
| PA3968 |              | probable pseudouridine synthase                     |
| PA4028 |              | hypothetical protein                                |
| PA4067 | <i>oprG</i>  | Outer membrane protein OprG precursor               |
| PA4141 |              | hypothetical protein                                |
| PA4211 | <i>phzB1</i> | probable phenazine biosynthesis protein             |
| PA4217 | <i>phzS</i>  | flavin-containing monooxygenase                     |
| PA4348 |              | conserved hypothetical protein                      |
| PA4352 |              | conserved hypothetical protein                      |
| PA4385 | <i>groEL</i> | GroEL protein                                       |
| PA4386 | <i>groES</i> | GroES protein                                       |
| PA4407 | <i>ftsZ</i>  | cell division protein FtsZ                          |
| PA4463 |              | conserved hypothetical protein                      |
| PA4577 |              | hypothetical protein                                |
| PA4578 |              | hypothetical protein                                |
| PA4587 | <i>ccpR</i>  | cytochrome c551 peroxidase precursor                |
| PA4610 |              | hypothetical protein                                |
| PA4699 |              | hypothetical protein                                |
| PA4760 | <i>dnaJ</i>  | DnaJ protein                                        |
| PA4922 | <i>azu</i>   | azurin precursor                                    |
| PA5027 |              | hypothetical protein                                |
| PA5044 | <i>pilM</i>  | type 4 fimbrial biogenesis protein PilM             |
| PA5086 |              | hypothetical protein                                |
| PA5087 |              | hypothetical protein                                |
| PA5105 | <i>hutC</i>  | histidine utilization repressor HutC                |
| PA5106 |              | conserved hypothetical protein                      |
| PA5170 | <i>arcD</i>  | arginine/ornithine antiporter                       |
| PA5171 | <i>arcA</i>  | arginine deiminase                                  |
| PA5172 | <i>arcB</i>  | ornithine carbamoyltransferase, catabolic           |
| PA5173 | <i>arcC</i>  | carbamate kinase                                    |
| PA5232 |              | conserved hypothetical protein                      |
| PA5427 | <i>adhA</i>  | alcohol dehydrogenase                               |
| PA5475 |              | hypothetical protein                                |
| PA5494 |              | hypothetical protein                                |

---
