# Supplementary material for: In-Vivo Expression Profiling of Pseudomonas aeruginosa Infections Reveals Niche-Specific and Strain-Independent Transcriptional Programs
Source: PubMed Central journal article supplement (PMC3171414; doi:10.1371/journal.pone.0024235), 2011-09-12
Supplement: pone.0024235.s005.pdf [file pone.0024235.s005.pdf]

Table S5

| Locus ID | Gene name   | Product name                                               |
|----------|-------------|------------------------------------------------------------|
| PA0089   |             | hypothetical protein                                       |
| PA0128   |             | conserved hypothetical protein                             |
| PA0140   | <i>ahpF</i> | alkyl hydroperoxide reductase subunit F                    |
| PA0161   |             | hypothetical protein                                       |
| PA0172   |             | hypothetical protein                                       |
| PA0257   |             | hypothetical protein                                       |
| PA0261   |             | hypothetical protein                                       |
| PA0263   | <i>hcpC</i> | secreted protein Hcp                                       |
| PA0291   | <i>oprE</i> | Anaerobically-induced outer membrane porin OprE precursor  |
| PA0297   | <i>spuA</i> | probable glutamine amidotransferase                        |
| PA0359   |             | hypothetical protein                                       |
| PA0363   | <i>coaD</i> | phosphopantetheine adenylyltransferase                     |
| PA0381   | <i>thiG</i> | thiamine biosynthesis protein, thiazole moiety             |
| PA0408   | <i>pilG</i> | twitching motility protein PilG                            |
| PA0409   | <i>pilH</i> | twitching motility protein PilH                            |
| PA0410   | <i>pilI</i> | twitching motility protein PilI                            |
| PA0411   | <i>pilJ</i> | twitching motility protein PilJ                            |
| PA0424   | <i>mexR</i> | multidrug resistance operon repressor MexR                 |
| PA0506   |             | probable acyl-CoA dehydrogenase                            |
| PA0541   |             | hypothetical protein                                       |
| PA0563   |             | conserved hypothetical protein                             |
| PA0576   | <i>rpoD</i> | sigma factor RpoD                                          |
| PA0578   |             | conserved hypothetical protein                             |
| PA0579   | <i>rpsU</i> | 30S ribosomal protein S21                                  |
| PA0581   |             | conserved hypothetical protein                             |
| PA0589   |             | conserved hypothetical protein                             |
| PA0595   | <i>ostA</i> | organic solvent tolerance protein OstA precursor           |
| PA0652   | <i>vfr</i>  | transcriptional regulator Vfr                              |
| PA0654   | <i>speD</i> | S-adenosylmethionine decarboxylase proenzyme               |
| PA0655   |             | hypothetical protein                                       |
| PA0667   |             | conserved hypothetical protein                             |
| PA0767   | <i>lepA</i> | GTP-binding protein LepA                                   |
| PA0768   | <i>lepB</i> | signal peptidase I                                         |
| PA0805   |             | hypothetical protein                                       |
| PA0915   |             | conserved hypothetical protein                             |
| PA0916   |             | conserved hypothetical protein                             |
| PA0944   | <i>purN</i> | phosphoribosylaminoimidazole synthetase                    |
| PA0945   | <i>purM</i> | phosphoribosylaminoimidazole synthetase                    |
| PA0955   |             | hypothetical protein                                       |
| PA0961   |             | probable cold-shock protein                                |
| PA0965   | <i>ruvC</i> | Holliday junction resolvase RuvC                           |
| PA0974   |             | conserved hypothetical protein                             |
| PA0981   |             | hypothetical protein                                       |
| PA0996   | <i>pqsA</i> | probable coenzyme A ligase                                 |
| PA0998   | <i>pqsC</i> | Homologous to beta-keto-acyl-acyl-carrier protein synthase |
| PA1006   |             | conserved hypothetical protein                             |
| PA1034   |             | hypothetical protein                                       |
| PA1080   | <i>flgE</i> | flagellar hook protein FlgE                                |
| PA1094   | <i>fliD</i> | flagellar capping protein FliD                             |
| PA1123   |             | hypothetical protein                                       |
| PA1132   |             | hypothetical protein                                       |
| PA1159   |             | probable cold-shock protein                                |

|        |             |                                                                    |
|--------|-------------|--------------------------------------------------------------------|
| PA1168 |             | hypothetical protein                                               |
| PA1183 | <i>dctA</i> | C4-dicarboxylate transport protein                                 |
| PA1193 |             | hypothetical protein                                               |
| PA1439 |             | conserved hypothetical protein                                     |
| PA1477 | <i>ccmC</i> | heme exporter protein CcmC                                         |
| PA1479 | <i>ccmE</i> | cytochrome C-type biogenesis protein CcmE                          |
| PA1480 | <i>ccmF</i> | cytochrome C-type biogenesis protein CcmF                          |
| PA1482 | <i>ccmH</i> | cytochrome C-type biogenesis protein CcmH                          |
| PA1541 |             | probable drug efflux transporter                                   |
| PA1543 | <i>apt</i>  | adenine phosphoribosyltransferase                                  |
| PA1546 | <i>hemN</i> | oxygen-independent coproporphyrinogen III oxidase                  |
| PA1551 |             | probable ferredoxin                                                |
| PA1556 |             | probable cytochrome c oxidase subunit                              |
| PA1564 |             | conserved hypothetical protein                                     |
| PA1580 | <i>gltA</i> | citrate synthase                                                   |
| PA1582 | <i>sdhD</i> | succinate dehydrogenase (D subunit)                                |
| PA1584 | <i>sdhB</i> | succinate dehydrogenase (B subunit)                                |
| PA1610 | <i>fabA</i> | beta-hydroxydecanoyl-ACP dehydrase                                 |
| PA1656 |             | hypothetical protein                                               |
| PA1657 |             | conserved hypothetical protein                                     |
| PA1658 |             | conserved hypothetical protein                                     |
| PA1659 |             | hypothetical protein                                               |
| PA1660 |             | hypothetical protein                                               |
| PA1661 |             | hypothetical protein                                               |
| PA1668 |             | hypothetical protein                                               |
| PA1669 |             | hypothetical protein                                               |
| PA1713 | <i>exsA</i> | transcriptional regulator ExsA                                     |
| PA1767 |             | hypothetical protein                                               |
| PA1768 |             | hypothetical protein                                               |
| PA1774 | <i>cfrX</i> | CfrX protein                                                       |
| PA1801 | <i>clpP</i> | ATP-dependent Clp protease proteolytic subunit                     |
| PA1805 | <i>ppiD</i> | peptidyl-prolyl cis-trans isomerase D                              |
| PA1812 | <i>mltD</i> | membrane-bound lytic murein transglycosylase D precursor           |
| PA1830 |             | hypothetical protein                                               |
| PA2042 |             | probable transporter (membrane subunit)                            |
| PA2112 |             | conserved hypothetical protein                                     |
| PA2456 |             | hypothetical protein                                               |
| PA2459 |             | hypothetical protein                                               |
| PA2584 | <i>pgsA</i> | CDP-diacylglycerol--glycerol-3-phosphate 3-phosphatidyltransferase |
| PA2593 |             | hypothetical protein                                               |
| PA2619 | <i>infA</i> | initiation factor                                                  |
| PA2624 | <i>idh</i>  | isocitrate dehydrogenase                                           |
| PA2627 |             | conserved hypothetical protein                                     |
| PA2629 | <i>purB</i> | adenylosuccinate lyase                                             |
| PA2637 | <i>nuoA</i> | NADH dehydrogenase I chain A                                       |
| PA2639 | <i>nuoD</i> | NADH dehydrogenase I chain C,D                                     |
| PA2666 |             | probable 6-pyruvoyl tetrahydrobiopterin synthase                   |
| PA2667 |             | conserved hypothetical protein                                     |
| PA2741 | <i>rplT</i> | 50S ribosomal protein L20                                          |
| PA2769 |             | hypothetical protein                                               |
| PA2840 |             | probable ATP-dependent RNA helicase                                |
| PA2851 | <i>efp</i>  | translation elongation factor P                                    |
| PA2953 |             | electron transfer flavoprotein-ubiquinone oxidoreductase           |
| PA2957 |             | probable transcriptional regulator                                 |
| PA2959 |             | conserved hypothetical protein                                     |

|        |              |                                                                    |
|--------|--------------|--------------------------------------------------------------------|
| PA2960 | <i>pilZ</i>  | type 4 fimbrial biogenesis protein PilZ                            |
| PA2966 | <i>acpP</i>  | acyl carrier protein                                               |
| PA2970 | <i>rpmF</i>  | 50S ribosomal protein L32                                          |
| PA2971 |              | conserved hypothetical protein                                     |
| PA2986 |              | conserved hypothetical protein                                     |
| PA3013 | <i>foaB</i>  | fatty-acid oxidation complex beta-subunit                          |
| PA3057 |              | hypothetical protein                                               |
| PA3112 | <i>accD</i>  | acetyl-CoA carboxylase beta subunit                                |
| PA3162 | <i>rpsA</i>  | 30S ribosomal protein S1                                           |
| PA3217 | <i>cyaB</i>  | CyaB                                                               |
| PA3245 | <i>minE</i>  | cell division topological specificity factor MinE                  |
| PA3280 | <i>oprO</i>  | Pyrophosphate-specific outer membrane porin OprO precursor         |
| PA3292 |              | hypothetical protein                                               |
| PA3299 | <i>fadD1</i> | long-chain-fatty-acid--CoA ligase                                  |
| PA3332 |              | conserved hypothetical protein                                     |
| PA3383 |              | binding protein component of ABC phosphonate transporter           |
| PA3480 |              | probable deoxycytidine triphosphate deaminase                      |
| PA3489 |              | conserved hypothetical protein                                     |
| PA3525 | <i>argG</i>  | argininosuccinate synthase                                         |
| PA3531 | <i>bfrB</i>  | bacterioferritin                                                   |
| PA3611 |              | hypothetical protein                                               |
| PA3612 |              | conserved hypothetical protein                                     |
| PA3621 | <i>fdxA</i>  | ferredoxin I                                                       |
| PA3633 | <i>ygbP</i>  | 4-diphosphocytidyl-2-C-methylerythritol synthase                   |
| PA3636 | <i>kdsA</i>  | 2-dehydro-3-deoxyphosphooctonate aldolase                          |
| PA3639 | <i>accA</i>  | acetyl-coenzyme A carboxylase carboxyl transferase (alpha subunit) |
| PA3642 | <i>rnhB</i>  | ribonuclease HII                                                   |
| PA3644 | <i>lpxA</i>  | UDP-N-acetylglucosamine acyltransferase                            |
| PA3645 | <i>fabZ</i>  | (3R)-hydroxymyristoyl-[acyl carrier protein] dehydratase           |
| PA3646 | <i>lpxD</i>  | UDP-3-O-[3-hydroxy-lauroyl] glucosamine N-acyltransferase          |
| PA3648 | <i>opr86</i> | outer membrane protein Opr86                                       |
| PA3653 | <i>frr</i>   | ribosome recycling factor                                          |
| PA3654 | <i>pyrH</i>  | uridylate kinase                                                   |
| PA3655 | <i>tsf</i>   | elongation factor Ts                                               |
| PA3656 | <i>rpsB</i>  | 30S ribosomal protein S2                                           |
| PA3686 | <i>adk</i>   | adenylate kinase                                                   |
| PA3700 | <i>lysS</i>  | lysyl-tRNA synthetase                                              |
| PA3722 |              | hypothetical protein                                               |
| PA3741 |              | hypothetical protein                                               |
| PA3742 | <i>rplS</i>  | 50S ribosomal protein L19                                          |
| PA3743 | <i>trmD</i>  | tRNA (guanine-N1)-methyltransferase                                |
| PA3745 | <i>rpsP</i>  | 30S ribosomal protein S16                                          |
| PA3770 | <i>guaB</i>  | inosine-5'-monophosphate dehydrogenase                             |
| PA3804 |              | hypothetical protein                                               |
| PA3805 | <i>pilF</i>  | type 4 fimbrial biogenesis protein PilF                            |
| PA3806 |              | conserved hypothetical protein                                     |
| PA3818 |              | extragenic suppressor protein SuhB                                 |
| PA3822 |              | conserved hypothetical protein                                     |
| PA3824 | <i>queA</i>  | S-adenosylmethionine:trna ribosyltransferase-isomerase             |
| PA3903 | <i>prfC</i>  | peptide chain release factor 3                                     |
| PA3905 |              | hypothetical protein                                               |
| PA3906 |              | hypothetical protein                                               |
| PA3907 |              | hypothetical protein                                               |
| PA3908 |              | hypothetical protein                                               |
| PA3941 |              | hypothetical protein                                               |

|        |              |                                              |
|--------|--------------|----------------------------------------------|
| PA3966 |              | hypothetical protein                         |
| PA3967 |              | hypothetical protein                         |
| PA3979 |              | hypothetical protein                         |
| PA3980 |              | conserved hypothetical protein               |
| PA3982 |              | conserved hypothetical protein               |
| PA3989 | <i>hola</i>  | DNA polymerase III, delta subunit            |
| PA4031 | <i>ppa</i>   | inorganic pyrophosphatase                    |
| PA4130 |              | probable sulfite or nitrite reductase        |
| PA4131 |              | probable iron-sulfur protein                 |
| PA4132 |              | conserved hypothetical protein               |
| PA4133 |              | cytochrome c oxidase subunit (cbb3-type)     |
| PA4134 |              | hypothetical protein                         |
| PA4139 |              | hypothetical protein                         |
| PA4140 |              | hypothetical protein                         |
| PA4142 |              | probable secretion protein                   |
| PA4237 | <i>rplQ</i>  | 50S ribosomal protein L17                    |
| PA4238 | <i>rpoA</i>  | DNA-directed RNA polymerase alpha chain      |
| PA4239 | <i>rpsD</i>  | 30S ribosomal protein S4                     |
| PA4240 | <i>rpsK</i>  | 30S ribosomal protein S11                    |
| PA4241 | <i>rpsM</i>  | 30S ribosomal protein S13                    |
| PA4242 | <i>rpmJ</i>  | 50S ribosomal protein L36                    |
| PA4243 | <i>secY</i>  | secretion protein SecY                       |
| PA4246 | <i>rpsE</i>  | 30S ribosomal protein S5                     |
| PA4247 | <i>rplR</i>  | 50S ribosomal protein L18                    |
| PA4249 | <i>rpsH</i>  | 30S ribosomal protein S8                     |
| PA4250 | <i>rpsN</i>  | 30S ribosomal protein S14                    |
| PA4251 | <i>rplE</i>  | 50S ribosomal protein L5                     |
| PA4252 | <i>rplX</i>  | 50S ribosomal protein L24                    |
| PA4253 | <i>rplN</i>  | 50S ribosomal protein L14                    |
| PA4254 | <i>rpsQ</i>  | 30S ribosomal protein S17                    |
| PA4258 | <i>rplV</i>  | 50S ribosomal protein L22                    |
| PA4261 | <i>rplW</i>  | 50S ribosomal protein L23                    |
| PA4264 | <i>rpsJ</i>  | 30S ribosomal protein S10                    |
| PA4265 | <i>tufA</i>  | elongation factor Tu                         |
| PA4266 | <i>fusA1</i> | elongation factor G                          |
| PA4268 | <i>rpsL</i>  | 30S ribosomal protein S12                    |
| PA4269 | <i>rpoC</i>  | DNA-directed RNA polymerase beta* chain      |
| PA4270 | <i>rpoB</i>  | DNA-directed RNA polymerase beta chain       |
| PA4271 | <i>rplL</i>  | 50S ribosomal protein L7 / L12               |
| PA4272 | <i>rplJ</i>  | 50S ribosomal protein L10                    |
| PA4273 | <i>rplA</i>  | 50S ribosomal protein L1                     |
| PA4274 | <i>rplK</i>  | 50S ribosomal protein L11                    |
| PA4275 | <i>nusG</i>  | transcription antitermination protein NusG   |
| PA4276 | <i>secE</i>  | secretion protein SecE                       |
| PA4317 |              | hypothetical protein                         |
| PA4318 |              | hypothetical protein                         |
| PA4319 |              | conserved hypothetical protein               |
| PA4405 |              | hypothetical protein                         |
| PA4406 | <i>lpxC</i>  | UDP-3-O-acyl-N-acetylglucosamine deacetylase |
| PA4426 |              | conserved hypothetical protein               |
| PA4427 | <i>sspB</i>  | stringent starvation protein B               |
| PA4428 | <i>sspA</i>  | stringent starvation protein A               |
| PA4429 |              | probable cytochrome c1 precursor             |
| PA4430 |              | probable cytochrome b                        |
| PA4431 |              | probable iron-sulfur protein                 |

|        |              |                                                                      |
|--------|--------------|----------------------------------------------------------------------|
| PA4432 | <i>rpsI</i>  | 30S ribosomal protein S9                                             |
| PA4433 | <i>rplM</i>  | 50S ribosomal protein L13                                            |
| PA4449 | <i>hisG</i>  | ATP-phosphoribosyltransferase                                        |
| PA4451 |              | conserved hypothetical protein                                       |
| PA4458 |              | conserved hypothetical protein                                       |
| PA4459 |              | conserved hypothetical protein                                       |
| PA4460 |              | conserved hypothetical protein                                       |
| PA4461 |              | probable ATP-binding component of ABC transporter                    |
| PA4465 |              | conserved hypothetical protein                                       |
| PA4466 |              | probable phosphoryl carrier protein                                  |
| PA4479 | <i>mreD</i>  | rod shape-determining protein MreD                                   |
| PA4480 | <i>mreC</i>  | rod shape-determining protein MreC                                   |
| PA4482 | <i>gatC</i>  | Glu-tRNA(Gln) amidotransferase subunit C                             |
| PA4494 |              | probable two-component sensor                                        |
| PA4528 | <i>pilD</i>  | type 4 prepilin peptidase PilD                                       |
| PA4530 |              | conserved hypothetical protein                                       |
| PA4554 | <i>pilYI</i> | type 4 fimbrial biogenesis protein PilY1                             |
| PA4563 | <i>rpsT</i>  | 30S ribosomal protein S20                                            |
| PA4568 | <i>rplU</i>  | 50S ribosomal protein L21                                            |
| PA4569 | <i>ispB</i>  | octaprenyl-diphosphate synthase                                      |
| PA4574 |              | conserved hypothetical protein                                       |
| PA4625 |              | hypothetical protein                                                 |
| PA4640 | <i>mgoB</i>  | malate:quinone oxidoreductase                                        |
| PA4670 | <i>prs</i>   | ribose-phosphate pyrophosphokinase                                   |
| PA4671 |              | probable ribosomal protein L25                                       |
| PA4672 |              | peptidyl-tRNA hydrolase                                              |
| PA4673 |              | conserved hypothetical protein                                       |
| PA4678 | <i>rimI</i>  | peptide n-acetyltransferase RimI                                     |
| PA4728 | <i>folK</i>  | 2-amino-4-hydroxy-6-hydroxymethylidihydropteridine pyrophosphokinase |
| PA4740 | <i>pnp</i>   | polyribonucleotide nucleotidyltransferase                            |
| PA4743 | <i>rbfA</i>  | ribosome-binding factor A                                            |
| PA4744 | <i>infB</i>  | translation initiation factor IF-2                                   |
| PA4745 | <i>nusA</i>  | N utilization substance protein A                                    |
| PA4746 |              | conserved hypothetical protein                                       |
| PA4747 | <i>secG</i>  | secretion protein SecG                                               |
| PA4753 |              | conserved hypothetical protein                                       |
| PA4757 |              | conserved hypothetical protein                                       |
| PA4765 | <i>omlA</i>  | Outer membrane lipoprotein OmlA precursor                            |
| PA4768 | <i>smpB</i>  | SmpB protein                                                         |
| PA4846 | <i>aroQI</i> | 3-dehydroquinate dehydratase                                         |
| PA4853 | <i>fis</i>   | DNA-binding protein Fis                                              |
| PA4932 | <i>rplI</i>  | 50S ribosomal protein L9                                             |
| PA4934 | <i>rpsR</i>  | 30S ribosomal protein S18                                            |
| PA4935 | <i>rpsF</i>  | 30S ribosomal protein S6                                             |
| PA4962 |              | conserved hypothetical protein                                       |
| PA4965 |              | hypothetical protein                                                 |
| PA4997 | <i>msbA</i>  | transport protein MsbA                                               |
| PA5033 |              | hypothetical protein                                                 |
| PA5043 | <i>pilN</i>  | type 4 fimbrial biogenesis protein PilN                              |
| PA5045 | <i>ponA</i>  | penicillin-binding protein 1A                                        |
| PA5046 |              | malic enzyme                                                         |
| PA5049 | <i>rpmE</i>  | 50S ribosomal protein L31                                            |
| PA5117 | <i>typA</i>  | regulatory protein TypA                                              |
| PA5118 | <i>thiI</i>  | thiazole biosynthesis protein ThiI                                   |
| PA5130 |              | conserved hypothetical protein                                       |

|        |              |                                                                        |
|--------|--------------|------------------------------------------------------------------------|
| PA5139 |              | hypothetical protein                                                   |
| PA5203 | <i>gshA</i>  | glutamate--cysteine ligase                                             |
| PA5239 | <i>rho</i>   | transcription termination factor Rho                                   |
| PA5244 |              | conserved hypothetical protein                                         |
| PA5296 | <i>rep</i>   | ATP-dependent DNA helicase Rep                                         |
| PA5300 | <i>cycB</i>  | cytochrome c5                                                          |
| PA5302 | <i>dadX</i>  | catabolic alanine racemase                                             |
| PA5315 | <i>rpmG</i>  | 50S ribosomal protein L33                                              |
| PA5316 | <i>rpmB</i>  | 50S ribosomal protein L28                                              |
| PA5338 | <i>spoT</i>  | guanosine-3',5'-bis(diphosphate) 3'-pyrophosphohydrolase               |
| PA5351 | <i>rubA1</i> | Rubredoxin 1                                                           |
| PA5366 | <i>pstB</i>  | ATP-binding component of ABC phosphate transporter                     |
| PA5367 | <i>pstA</i>  | membrane protein component of ABC phosphate transporter                |
| PA5369 | <i>pstS</i>  | phosphate ABC transporter, periplasmic phosphate-binding protein, PstS |
| PA5435 |              | probable transcarboxylase subunit                                      |
| PA5462 |              | hypothetical protein                                                   |
| PA5479 | <i>gltP</i>  | proton-glutamate symporter                                             |
| PA5490 | <i>cc4</i>   | cytochrome c4 precursor                                                |
| PA5491 |              | probable cytochrome                                                    |
| PA5492 |              | conserved hypothetical protein                                         |
| PA5505 |              | probable TonB-dependent receptor                                       |
| PA5554 | <i>atpD</i>  | ATP synthase beta chain                                                |
| PA5555 | <i>atpG</i>  | ATP synthase gamma chain                                               |
| PA5556 | <i>atpA</i>  | ATP synthase alpha chain                                               |
| PA5557 | <i>atpH</i>  | ATP synthase delta chain                                               |
| PA5560 | <i>atpB</i>  | ATP synthase A chain                                                   |
| PA5561 | <i>atpI</i>  | ATP synthase protein I                                                 |
| PA5563 | <i>soj</i>   | chromosome partitioning protein Soj                                    |
| PA5568 |              | conserved hypothetical protein                                         |
| PA5569 | <i>rnpA</i>  | ribonuclease P protein component                                       |
| PA5570 | <i>rpmH</i>  | 50S ribosomal protein L34                                              |

---
