# Supplementary material for: In-Vivo Expression Profiling of Pseudomonas aeruginosa Infections Reveals Niche-Specific and Strain-Independent Transcriptional Programs
Source: PubMed Central journal article supplement (PMC3171414; doi:10.1371/journal.pone.0024235), 2011-09-12
Supplement: pone.0024235.s006.pdf [file pone.0024235.s006.pdf]

Table S6

| Locus ID | Gene name    | Product name                                                                             |
|----------|--------------|------------------------------------------------------------------------------------------|
| PA0038   |              | hypothetical protein                                                                     |
| PA0039   |              | hypothetical protein                                                                     |
| PA0052   |              | hypothetical protein                                                                     |
| PA0105   | <i>coxB</i>  | cytochrome c oxidase, subunit II                                                         |
| PA0106   | <i>coxA</i>  | cytochrome c oxidase, subunit I                                                          |
| PA0107   |              | conserved hypothetical protein                                                           |
| PA0108   | <i>coIII</i> | cytochrome c oxidase, subunit III                                                        |
| PA0109   |              | hypothetical protein                                                                     |
| PA0110   |              | hypothetical protein                                                                     |
| PA0111   |              | hypothetical protein                                                                     |
| PA0112   |              | hypothetical protein                                                                     |
| PA0113   |              | probable cytochrome c oxidase assembly factor                                            |
| PA0122   |              | conserved hypothetical protein                                                           |
| PA0156   | <i>triA</i>  | Resistance-Nodulation-Cell Division (RND) triclosan efflux membrane fusion protein, TriA |
| PA0157   | <i>triB</i>  | Resistance-Nodulation-Cell Division (RND) triclosan efflux membrane fusion protein, TriB |
| PA0173   |              | probable methylesterase                                                                  |
| PA0175   |              | probable chemotaxis protein methyltransferase                                            |
| PA0176   | <i>aer2</i>  | aerotaxis transducer Aer2                                                                |
| PA0177   |              | probable purine-binding chemotaxis protein                                               |
| PA0178   |              | probable two-component sensor                                                            |
| PA0179   |              | probable two-component response regulator                                                |
| PA0180   |              | probable chemotaxis transducer                                                           |
| PA0200   |              | hypothetical protein                                                                     |
| PA0249   |              | probable acetyltransferase                                                               |
| PA0250   |              | conserved hypothetical protein                                                           |
| PA0256   |              | hypothetical protein                                                                     |
| PA0312   |              | conserved hypothetical protein                                                           |
| PA0329   |              | conserved hypothetical protein                                                           |
| PA0332   |              | hypothetical protein                                                                     |
| PA0365   |              | hypothetical protein                                                                     |
| PA0366   |              | probable aldehyde dehydrogenase                                                          |
| PA0384   |              | hypothetical protein                                                                     |
| PA0387   |              | conserved hypothetical protein                                                           |
| PA0388   |              | hypothetical protein                                                                     |
| PA0432   | <i>sahH</i>  | S-adenosyl-L-homocysteine hydrolase                                                      |
| PA0452   |              | probable stomatin-like protein                                                           |
| PA0459   |              | probable ClpA/B protease ATP binding subunit                                             |
| PA0484   |              | conserved hypothetical protein                                                           |
| PA0520   | <i>nirQ</i>  | regulatory protein NirQ                                                                  |
| PA0540   |              | hypothetical protein                                                                     |
| PA0586   |              | conserved hypothetical protein                                                           |
| PA0588   |              | conserved hypothetical protein                                                           |
| PA0612   | <i>ptrB</i>  | repressor, PtrB                                                                          |
| PA0614   |              | hypothetical protein                                                                     |
| PA0616   |              | hypothetical protein                                                                     |
| PA0619   |              | probable bacteriophage protein                                                           |
| PA0624   |              | hypothetical protein                                                                     |
| PA0631   |              | hypothetical protein                                                                     |
| PA0635   |              | hypothetical protein                                                                     |
| PA0636   |              | hypothetical protein                                                                     |

|        |              |                                                                               |
|--------|--------------|-------------------------------------------------------------------------------|
| PA0648 |              | hypothetical protein                                                          |
| PA0656 |              | probable HIT family protein                                                   |
| PA0745 |              | probable enoyl-CoA hydratase/isomerase                                        |
| PA0746 |              | probable acyl-CoA dehydrogenase                                               |
| PA0762 | <i>algU</i>  | sigma factor AlgU                                                             |
| PA0776 |              | hypothetical protein                                                          |
| PA0865 | <i>hpd</i>   | 4-hydroxyphenylpyruvate dioxygenase                                           |
| PA0866 | <i>aroP2</i> | aromatic amino acid transport protein AroP2                                   |
| PA0870 | <i>phhC</i>  | aromatic amino acid aminotransferase                                          |
| PA0871 | <i>phhB</i>  | pterin-4-alpha-carbinolamine dehydratase                                      |
| PA0872 | <i>phhA</i>  | phenylalanine-4-hydroxylase                                                   |
| PA0887 | <i>acsA</i>  | acetyl-coenzyme A synthetase                                                  |
| PA0921 |              | hypothetical protein                                                          |
| PA0959 |              | hypothetical protein                                                          |
| PA0960 |              | hypothetical protein                                                          |
| PA1002 | <i>phnB</i>  | anthranilate synthase component II                                            |
| PA1027 |              | probable aldehyde dehydrogenase                                               |
| PA1041 |              | probable outer membrane protein precursor                                     |
| PA1042 |              | conserved hypothetical protein                                                |
| PA1048 |              | probable outer membrane protein precursor                                     |
| PA1053 |              | conserved hypothetical protein                                                |
| PA1084 | <i>flgI</i>  | flagellar P-ring protein precursor FlgI                                       |
| PA1121 |              | conserved hypothetical protein                                                |
| PA1172 | <i>napC</i>  | cytochrome c-type protein NapC                                                |
| PA1173 | <i>napB</i>  | cytochrome c-type protein NapB precursor                                      |
| PA1174 | <i>napA</i>  | periplasmic nitrate reductase protein NapA                                    |
| PA1175 | <i>napD</i>  | NapD protein of periplasmic nitrate reductase                                 |
| PA1176 | <i>napF</i>  | ferredoxin protein NapF                                                       |
| PA1177 | <i>napE</i>  | periplasmic nitrate reductase protein NapE                                    |
| PA1178 | <i>oprH</i>  | PhoP/Q and low Mg <sup>2+</sup> inducible outer membrane protein H1 precursor |
| PA1179 | <i>phoP</i>  | two-component response regulator PhoP                                         |
| PA1180 | <i>phoQ</i>  | two-component sensor PhoQ                                                     |
| PA1202 |              | probable hydrolase                                                            |
| PA1246 | <i>aprD</i>  | alkaline protease secretion protein AprD                                      |
| PA1247 | <i>aprE</i>  | alkaline protease secretion protein AprE                                      |
| PA1249 | <i>aprA</i>  | alkaline metalloproteinase precursor                                          |
| PA1283 |              | probable transcriptional regulator                                            |
| PA1287 |              | probable glutathione peroxidase                                               |
| PA1289 |              | hypothetical protein                                                          |
| PA1301 |              | probable transmembrane sensor                                                 |
| PA1327 |              | probable protease                                                             |
| PA1342 |              | probable binding protein component of ABC transporter                         |
| PA1348 |              | hypothetical protein                                                          |
| PA1353 |              | hypothetical protein                                                          |
| PA1430 | <i>lasR</i>  | transcriptional regulator LasR                                                |
| PA1431 | <i>rsaL</i>  | regulatory protein RsaL                                                       |
| PA1432 | <i>lasI</i>  | autoinducer synthesis protein LasI                                            |
| PA1454 | <i>fleN</i>  | flagellar synthesis regulator FleN                                            |
| PA1455 | <i>fliA</i>  | sigma factor FliA                                                             |
| PA1456 | <i>cheY</i>  | two-component response regulator CheY                                         |
| PA1458 |              | probable two-component sensor                                                 |
| PA1462 |              | probable plasmid partitioning protein                                         |
| PA1464 |              | probable purine-binding chemotaxis protein                                    |
| PA1545 |              | hypothetical protein                                                          |
| PA1617 |              | probable AMP-binding enzyme                                                   |

|        |              |                                                                    |
|--------|--------------|--------------------------------------------------------------------|
| PA1641 |              | hypothetical protein                                               |
| PA1728 |              | hypothetical protein                                               |
| PA1729 |              | conserved hypothetical protein                                     |
| PA1733 |              | conserved hypothetical protein                                     |
| PA1752 |              | hypothetical protein                                               |
| PA1753 |              | conserved hypothetical protein                                     |
| PA1760 |              | probable transcriptional regulator                                 |
| PA1762 |              | hypothetical protein                                               |
| PA1784 |              | hypothetical protein                                               |
| PA1817 |              | hypothetical protein                                               |
| PA1819 |              | probable amino acid permease                                       |
| PA1860 |              | hypothetical protein                                               |
| PA1874 |              | hypothetical protein                                               |
| PA1875 |              | probable outer membrane protein precursor                          |
| PA1876 |              | probable ATP-binding/permease fusion ABC transporter               |
| PA1887 |              | hypothetical protein                                               |
| PA1888 |              | hypothetical protein                                               |
| PA1914 |              | conserved hypothetical protein                                     |
| PA1931 |              | probable ferredoxin                                                |
| PA1944 |              | hypothetical protein                                               |
| PA1985 | <i>pqqA</i>  | pyrroloquinoline quinone biosynthesis protein A                    |
| PA2006 |              | probable major facilitator superfamily (MFS) transporter           |
| PA2007 | <i>maiA</i>  | maleylacetoacetate isomerase                                       |
| PA2009 | <i>hmgA</i>  | homogentisate 1,2-dioxygenase                                      |
| PA2020 |              | probable transcriptional regulator                                 |
| PA2024 |              | probable ring-cleaving dioxygenase                                 |
| PA2025 | <i>gor</i>   | glutathione reductase                                              |
| PA2027 |              | hypothetical protein                                               |
| PA2166 |              | hypothetical protein                                               |
| PA2174 |              | hypothetical protein                                               |
| PA2237 | <i>pslG</i>  | probable glycosyl hydrolase                                        |
| PA2247 | <i>bkdA1</i> | 2-oxoisovalerate dehydrogenase (alpha subunit)                     |
| PA2248 | <i>bkdA2</i> | 2-oxoisovalerate dehydrogenase (beta subunit)                      |
| PA2249 | <i>bkdB</i>  | branched-chain alpha-keto acid dehydrogenase (lipoamide component) |
| PA2250 | <i>lpdV</i>  | lipoamide dehydrogenase-Val                                        |
| PA2364 |              | hypothetical protein                                               |
| PA2365 |              | conserved hypothetical protein                                     |
| PA2367 |              | hypothetical protein                                               |
| PA2375 |              | hypothetical protein                                               |
| PA2381 |              | hypothetical protein                                               |
| PA2422 |              | hypothetical protein                                               |
| PA2423 |              | hypothetical protein                                               |
| PA2433 |              | hypothetical protein                                               |
| PA2434 |              | hypothetical protein                                               |
| PA2501 |              | hypothetical protein                                               |
| PA2504 |              | hypothetical protein                                               |
| PA2511 |              | probable transcriptional regulator                                 |
| PA2562 |              | hypothetical protein                                               |
| PA2564 |              | hypothetical protein                                               |
| PA2565 |              | hypothetical protein                                               |
| PA2566 |              | conserved hypothetical protein                                     |
| PA2571 |              | probable two-component sensor                                      |
| PA2573 |              | probable chemotaxis transducer                                     |
| PA2577 |              | probable transcriptional regulator                                 |
| PA2587 | <i>pqsH</i>  | probable FAD-dependent monooxygenase                               |

|        |             |                                                          |
|--------|-------------|----------------------------------------------------------|
| PA2591 |             | probable transcriptional regulator                       |
| PA2605 |             | conserved hypothetical protein                           |
| PA2607 |             | conserved hypothetical protein                           |
| PA2618 |             | hypothetical protein                                     |
| PA2620 | <i>clpA</i> | ATP-binding protease component ClpA                      |
| PA2622 | <i>cspD</i> | cold-shock protein CspD                                  |
| PA2640 | <i>nuoE</i> | NADH dehydrogenase I chain E                             |
| PA2643 | <i>nuoH</i> | NADH dehydrogenase I chain H                             |
| PA2645 | <i>nuoJ</i> | NADH dehydrogenase I chain J                             |
| PA2646 | <i>nuoK</i> | NADH dehydrogenase I chain K                             |
| PA2747 |             | hypothetical protein                                     |
| PA2754 |             | conserved hypothetical protein                           |
| PA2762 |             | hypothetical protein                                     |
| PA2771 |             | conserved hypothetical protein                           |
| PA2779 |             | hypothetical protein                                     |
| PA2799 |             | hypothetical protein                                     |
| PA2827 |             | conserved hypothetical protein                           |
| PA2841 |             | probable enoyl-CoA hydratase/isomerase                   |
| PA2849 |             | probable transcriptional regulator                       |
| PA2883 |             | hypothetical protein                                     |
| PA2897 |             | probable transcriptional regulator                       |
| PA2915 |             | hypothetical protein                                     |
| PA2920 |             | probable chemotaxis transducer                           |
| PA2937 |             | hypothetical protein                                     |
| PA2939 |             | probable aminopeptidase                                  |
| PA3017 |             | conserved hypothetical protein                           |
| PA3032 | <i>snr1</i> | cytochrome c Snr1                                        |
| PA3040 |             | conserved hypothetical protein                           |
| PA3068 | <i>gdhB</i> | NAD-dependent glutamate dehydrogenase                    |
| PA3186 | <i>oprB</i> | Glucose/carbohydrate outer membrane porin OprB precursor |
| PA3187 |             | probable ATP-binding component of ABC transporter        |
| PA3188 |             | probable permease of ABC sugar transporter               |
| PA3216 |             | hypothetical protein                                     |
| PA3229 |             | hypothetical protein                                     |
| PA3234 |             | probable sodium:solute symporter                         |
| PA3235 |             | conserved hypothetical protein                           |
| PA3311 |             | conserved hypothetical protein                           |
| PA3316 |             | probable permease of ABC transporter                     |
| PA3343 |             | hypothetical protein                                     |
| PA3345 |             | hypothetical protein                                     |
| PA3346 |             | probable two-component response regulator                |
| PA3347 |             | hypothetical protein                                     |
| PA3348 |             | probable chemotaxis protein methyltransferase            |
| PA3349 |             | probable chemotaxis protein                              |
| PA3351 | <i>flgM</i> | FlgM                                                     |
| PA3352 |             | hypothetical protein                                     |
| PA3369 |             | hypothetical protein                                     |
| PA3371 |             | hypothetical protein                                     |
| PA3415 |             | probable dihydrolipoamide acetyltransferase              |
| PA3416 |             | probable pyruvate dehydrogenase E1 component, beta chain |
| PA3418 | <i>ldh</i>  | leucine dehydrogenase                                    |
| PA3451 |             | hypothetical protein                                     |
| PA3465 |             | conserved hypothetical protein                           |
| PA3477 | <i>rhlR</i> | transcriptional regulator RhlR                           |
| PA3496 |             | hypothetical protein                                     |

|        |             |                                                     |
|--------|-------------|-----------------------------------------------------|
| PA3526 |             | probable outer membrane protein precursor           |
| PA3568 |             | probable acetyl-coa synthetase                      |
| PA3569 | <i>mmsB</i> | 3-hydroxyisobutyrate dehydrogenase                  |
| PA3570 | <i>mmsA</i> | methylmalonate-semialdehyde dehydrogenase           |
| PA3622 | <i>rpoS</i> | sigma factor RpoS                                   |
| PA3628 |             | probable esterase                                   |
| PA3629 | <i>adhC</i> | alcohol dehydrogenase class III                     |
| PA3662 |             | hypothetical protein                                |
| PA3674 |             | hypothetical protein                                |
| PA3684 |             | hypothetical protein                                |
| PA3688 |             | hypothetical protein                                |
| PA3723 |             | probable FMN oxidoreductase                         |
| PA3724 | <i>lasB</i> | elastase LasB                                       |
| PA3740 |             | hypothetical protein                                |
| PA3753 |             | conserved hypothetical protein                      |
| PA3784 |             | hypothetical protein                                |
| PA3785 |             | conserved hypothetical protein                      |
| PA3786 |             | hypothetical protein                                |
| PA3792 | <i>leuA</i> | 2-isopropylmalate synthase                          |
| PA3833 |             | hypothetical protein                                |
| PA3846 |             | hypothetical protein                                |
| PA3847 |             | conserved hypothetical protein                      |
| PA3848 |             | hypothetical protein                                |
| PA3851 |             | hypothetical protein                                |
| PA3858 |             | probable amino acid-binding protein                 |
| PA3922 |             | conserved hypothetical protein                      |
| PA3923 |             | hypothetical protein                                |
| PA3945 |             | conserved hypothetical protein                      |
| PA3957 |             | probable short-chain dehydrogenase                  |
| PA3986 |             | hypothetical protein                                |
| PA4012 |             | hypothetical protein                                |
| PA4079 |             | probable dehydrogenase                              |
| PA4112 |             | probable sensor/response regulator hybrid           |
| PA4129 |             | hypothetical protein                                |
| PA4218 |             | probable transporter                                |
| PA4219 |             | hypothetical protein                                |
| PA4220 |             | hypothetical protein                                |
| PA4221 | <i>fptA</i> | Fe(III)-pyochelin outer membrane receptor precursor |
| PA4222 |             | probable ATP-binding component of ABC transporter   |
| PA4223 |             | probable ATP-binding component of ABC transporter   |
| PA4224 | <i>pchG</i> | pyochelin biosynthetic protein PchG                 |
| PA4225 | <i>pchF</i> | pyochelin synthetase                                |
| PA4226 | <i>pchE</i> | dihydroaeruginoic acid synthetase                   |
| PA4227 | <i>pchR</i> | transcriptional regulator PchR                      |
| PA4228 | <i>pchD</i> | pyochelin biosynthesis protein PchD                 |
| PA4229 | <i>pchC</i> | pyochelin biosynthetic protein PchC                 |
| PA4230 | <i>pchB</i> | salicylate biosynthesis protein PchB                |
| PA4231 | <i>pchA</i> | salicylate biosynthesis isochorismate synthase      |
| PA4290 |             | probable chemotaxis transducer                      |
| PA4294 |             | hypothetical protein                                |
| PA4296 | <i>pprB</i> | two-component response regulator, PprB              |
| PA4297 | <i>tadG</i> | TadG                                                |
| PA4298 |             | hypothetical protein                                |
| PA4299 | <i>tadD</i> | TadD                                                |
| PA4300 | <i>tadC</i> | TadC                                                |

|        |             |                                                                                                                     |
|--------|-------------|---------------------------------------------------------------------------------------------------------------------|
| PA4301 | <i>tadB</i> | TadB                                                                                                                |
| PA4302 | <i>tadA</i> | TadA ATPase                                                                                                         |
| PA4303 | <i>tadZ</i> | TadZ                                                                                                                |
| PA4304 | <i>rcpA</i> | RcpA                                                                                                                |
| PA4305 | <i>rcpC</i> | RcpC                                                                                                                |
| PA4306 | <i>flp</i>  | Type IVb pilin, Flp                                                                                                 |
| PA4311 |             | conserved hypothetical protein                                                                                      |
| PA4315 | <i>mvaT</i> | transcriptional regulator MvaT, P16 subunit                                                                         |
| PA4324 |             | hypothetical protein                                                                                                |
| PA4377 |             | hypothetical protein                                                                                                |
| PA4410 | <i>ddlB</i> | D-alanine--D-alanine ligase                                                                                         |
| PA4411 | <i>murC</i> | UDP-N-acetylmuramate--alanine ligase                                                                                |
| PA4412 | <i>murG</i> | UDP-N-acetylglucosamine--N-acetylmuramyl-(pentapeptide) pyrophosphoryl-undecaprenol N-acetylglucosamine transferase |
| PA4414 | <i>murD</i> | UDP-N-acetylmuramoylalanine--D-glutamate ligase                                                                     |
| PA4415 | <i>mraY</i> | phospho-N-acetylmuramoyl-pentapeptide-transferase                                                                   |
| PA4417 | <i>murE</i> | UDP-N-acetylmuramoylalanyl-D-glutamate-2, 6-diaminopimelate ligase                                                  |
| PA4418 | <i>ftsI</i> | penicillin-binding protein 3                                                                                        |
| PA4420 |             | conserved hypothetical protein                                                                                      |
| PA4474 |             | conserved hypothetical protein                                                                                      |
| PA4507 |             | hypothetical protein                                                                                                |
| PA4572 | <i>fkfB</i> | peptidyl-prolyl cis-trans isomerase FkfB                                                                            |
| PA4573 |             | hypothetical protein                                                                                                |
| PA4590 | <i>pra</i>  | protein activator                                                                                                   |
| PA4607 |             | hypothetical protein                                                                                                |
| PA4608 |             | hypothetical protein                                                                                                |
| PA4611 |             | hypothetical protein                                                                                                |
| PA4633 |             | probable chemotaxis transducer                                                                                      |
| PA4641 |             | still frameshift hypothetical protein                                                                               |
| PA4648 |             | hypothetical protein                                                                                                |
| PA4651 |             | probable pili assembly chaperone                                                                                    |
| PA4702 |             | hypothetical protein                                                                                                |
| PA4703 |             | hypothetical protein                                                                                                |
| PA4713 |             | hypothetical protein                                                                                                |
| PA4717 |             | conserved hypothetical protein                                                                                      |
| PA4733 | <i>acsB</i> | acetyl-coenzyme A synthetase                                                                                        |
| PA4735 |             | hypothetical protein                                                                                                |
| PA4736 |             | hypothetical protein                                                                                                |
| PA4766 |             | conserved hypothetical protein                                                                                      |
| PA4767 |             | conserved hypothetical protein                                                                                      |
| PA4778 |             | probable transcriptional regulator                                                                                  |
| PA4781 |             | probable two-component response regulator                                                                           |
| PA4782 |             | hypothetical protein                                                                                                |
| PA4793 |             | hypothetical protein                                                                                                |
| PA4810 | <i>fdnI</i> | nitrate-inducible formate dehydrogenase, gamma subunit                                                              |
| PA4811 | <i>fdnH</i> | nitrate-inducible formate dehydrogenase, beta subunit                                                               |
| PA4812 | <i>fdnG</i> | formate dehydrogenase-O, major subunit                                                                              |
| PA4841 |             | conserved hypothetical protein                                                                                      |
| PA4874 |             | conserved hypothetical protein                                                                                      |
| PA4876 | <i>osmE</i> | osmotically inducible lipoprotein OsmE                                                                              |
| PA4880 |             | probable bacterioferritin                                                                                           |
| PA4913 |             | probable binding protein component of ABC transporter                                                               |
| PA4915 |             | probable chemotaxis transducer                                                                                      |
| PA4925 |             | conserved hypothetical protein                                                                                      |
| PA4929 |             | hypothetical protein                                                                                                |
| PA5039 | <i>aroK</i> | shikimate kinase                                                                                                    |

|        |              |                                                                           |
|--------|--------------|---------------------------------------------------------------------------|
| PA5062 |              | conserved hypothetical protein                                            |
| PA5097 |              | probable amino acid permease                                              |
| PA5101 |              | hypothetical protein                                                      |
| PA5148 |              | conserved hypothetical protein                                            |
|        |              | amino acid (lysine/arginine/ornithine/histidine/octopine) ABC transporter |
| PA5153 |              | periplasmic binding protein                                               |
| PA5163 | <i>rmlA</i>  | glucose-1-phosphate thymidyltransferase                                   |
| PA5178 |              | conserved hypothetical protein                                            |
| PA5208 |              | conserved hypothetical protein                                            |
| PA5213 | <i>gcvP1</i> | glycine cleavage system protein P1                                        |
| PA5214 | <i>gcvH1</i> | glycine cleavage system protein H1                                        |
| PA5245 |              | conserved hypothetical protein                                            |
| PA5253 | <i>algP</i>  | alginate regulatory protein AlgP                                          |
| PA5255 | <i>algQ</i>  | Alginate regulatory protein AlgQ                                          |
| PA5261 | <i>algR</i>  | alginate biosynthesis regulatory protein AlgR                             |
| PA5301 |              | probable transcriptional regulator                                        |
| PA5348 |              | probable DNA-binding protein                                              |
| PA5350 | <i>rubA2</i> | Rubredoxin 2                                                              |
| PA5359 |              | hypothetical protein                                                      |
| PA5424 |              | conserved hypothetical protein                                            |
| PA5482 |              | hypothetical protein                                                      |
| PA5527 |              | hypothetical protein                                                      |
| PA5543 |              | hypothetical protein                                                      |
| PA5545 |              | conserved hypothetical protein                                            |
| PA5546 |              | conserved hypothetical protein                                            |

---
