# Supplementary material for: In-Vivo Expression Profiling of Pseudomonas aeruginosa Infections Reveals Niche-Specific and Strain-Independent Transcriptional Programs
Source: PubMed Central journal article supplement (PMC3171414; doi:10.1371/journal.pone.0024235), 2011-09-12
Supplement: pone.0024235.s007.pdf [file pone.0024235.s007.pdf]

Table S7.

| Locus ID | Gene name    | Product name                                                        | Fold change values    |                          |                                    |
|----------|--------------|---------------------------------------------------------------------|-----------------------|--------------------------|------------------------------------|
|          |              |                                                                     | Burn wound v. biofilm | Burn wound v. planktonic | PAO1 low iron v. PAO1 normal iron* |
| PA0472   |              | probable sigma-70 factor, ECF subfamily                             | 3.9                   | -                        | 46                                 |
| PA0672   | <i>hemO</i>  | heme oxygenase                                                      | 6.8                   | -                        | 138                                |
| PA0707   | <i>toxR</i>  | transcriptional regulator ToxR                                      | 4.2                   | 4.3                      | 8                                  |
| PA1134   |              | hypothetical protein                                                | 3.7                   | 3.7                      | 7                                  |
| PA1300   |              | probable sigma-70 factor, ECF subfamily                             | 5.5                   | -                        | 46                                 |
| PA1301   |              | probable transmembrane sensor                                       | 4.2                   | -                        | 46                                 |
| PA2033   |              | hypothetical protein                                                | 3.0                   | -                        | 95                                 |
| PA2034   |              | hypothetical protein                                                | 4.1                   | -                        | 95                                 |
| PA2383   |              | probable transcriptional regulator                                  | 4.2                   | 2.7                      | 148                                |
| PA2384   |              | hypothetical protein                                                | 12.3                  | 3.1                      | 148                                |
| PA2385   | <i>pvdQ</i>  | 3-oxo-C12-homoserine lactone acylase PvdQ                           | 5.5                   | 5.7                      | 11                                 |
| PA2386   | <i>pvdA</i>  | L-ornithine N5-oxygenase                                            | 4.4                   | 4.2                      | 216                                |
| PA2393   |              | probable dipeptidase precursor                                      | 3.5                   | 2.8                      | 38                                 |
| PA2395   | <i>pvdO</i>  | PvdO                                                                | 3.9                   | 3.8                      | 38                                 |
| PA2404   |              | hypothetical protein                                                | 4.2                   | 2.9                      | 15                                 |
| PA2405   |              | hypothetical protein                                                | 4.6                   | 4.0                      | 15                                 |
| PA2406   |              | hypothetical protein                                                | -                     | 3.5                      | 15                                 |
| PA2407   |              | probable adhesion protein                                           | 2.5                   | 2.6                      | 15                                 |
| PA2411   |              | probable thioesterase                                               | 15.5                  | 6.1                      | 126                                |
| PA2412   |              | conserved hypothetical protein                                      | 13.2                  | 5.8                      | 126                                |
| PA2413   | <i>pvdH</i>  | L-2,4-diaminobutyrate:2-ketoglutarate 4-aminotransferase, PvdH      | 4.7                   | 3.7                      | 65                                 |
| PA2424   | <i>pvdL</i>  | PvdL                                                                | 4.6                   | 3.2                      | 34                                 |
| PA2425   | <i>pvdG</i>  | PvdG                                                                | 3.8                   | 2.3                      | 34                                 |
| PA2426   | <i>pvdS</i>  | sigma factor PvdS                                                   | 10.4                  | 5.4                      | 177                                |
| PA2531   |              | probable aminotransferase                                           | -                     | 2.3                      | 11                                 |
| PA3397   | <i>fpr</i>   | ferredoxin--NADP+ reductase                                         | -                     | 2.9                      | 119                                |
| PA3407   | <i>hasAp</i> | heme acquisition protein HasAp                                      | 33.3                  | 31.4                     | 70                                 |
| PA3530   |              | conserved hypothetical protein                                      | 2.7                   | -                        | 203                                |
| PA3811   | <i>hscB</i>  | heat shock protein HscB                                             | -                     | 2.3                      | 4                                  |
| PA3812   | <i>iscA</i>  | probable iron-binding protein IscA                                  | -                     | 2.5                      | 4                                  |
| PA4175   | <i>piv</i>   | protease IV                                                         | 5.6                   | -                        | 7                                  |
| PA4220   |              | hypothetical protein                                                | 7.5                   | -                        | 182                                |
| PA4221   | <i>fptA</i>  | Fe(III)-pyochelin outer membrane receptor precursor                 | 3.7                   | -                        | 182                                |
| PA4223   |              | probable ATP-binding component of ABC transporter                   | 2.9                   | -                        | 55                                 |
| PA4224   | <i>pchG</i>  | pyochelin biosynthetic protein PchG                                 | 3.8                   | -                        | 55                                 |
| PA4227   | <i>pchR</i>  | transcriptional regulator PchR                                      | 5.2                   | -                        | 37                                 |
| PA4230   | <i>pchB</i>  | salicylate biosynthesis protein PchB                                | 4.3                   | -                        | 124                                |
| PA4370   | <i>icmP</i>  | Insulin-cleaving metalloproteinase outer membrane protein precursor | 2.9                   | -                        | 19                                 |
| PA4467   |              | hypothetical protein                                                | 10.1                  | -                        | 119                                |
| PA4468   | <i>sodM</i>  | superoxide dismutase                                                | 16.9                  | 3.6                      | 119                                |
| PA4469   |              | hypothetical protein                                                | 10.0                  | -                        | 119                                |
| PA4470   | <i>fumCI</i> | fumarate hydratase                                                  | 15.7                  | -                        | 119                                |

|        |             |                                                                             |      |     |     |
|--------|-------------|-----------------------------------------------------------------------------|------|-----|-----|
| PA4471 |             | hypothetical protein                                                        | 7.6  | 3.2 | 119 |
| PA4570 |             | hypothetical protein                                                        | 14.0 | -   | 403 |
| PA4833 |             | conserved hypothetical protein<br>probable sigma-70 factor, ECF             | 5.8  | -   | 4   |
| PA4896 |             | subfamily                                                                   | 3.5  | 3.4 | 20  |
| PA5150 |             | probable short-chain dehydrogenase<br>probable binding protein component of | 3.6  | -   | 10  |
| PA5217 |             | ABC iron transporter                                                        | 2.7  | -   | 18  |
| PA5531 | <i>tonB</i> | TonB protein                                                                | 3.1  | -   | 24  |

---

\* iron-regulated genes *in vitro* (12)
