# Supplementary material for: In-Vivo Expression Profiling of Pseudomonas aeruginosa Infections Reveals Niche-Specific and Strain-Independent Transcriptional Programs
Source: PubMed Central journal article supplement (PMC3171414; doi:10.1371/journal.pone.0024235), 2011-09-12
Supplement: pone.0024235.s008.pdf [file pone.0024235.s008.pdf]

Table S8

| Locus ID | Gene name    | Product name                                                            |
|----------|--------------|-------------------------------------------------------------------------|
| PA0076   |              | hypothetical protein                                                    |
| PA0077   | <i>icmF1</i> | IcmF1                                                                   |
| PA0129   | <i>gabP</i>  | gamma-aminobutyrate permease                                            |
| PA0143   | <i>nuh</i>   | purine nucleosidase Nuh                                                 |
| PA0241   |              | probable major facilitator superfamily (MFS) transporter                |
| PA0273   |              | probable major facilitator superfamily (MFS) transporter                |
| PA0309   |              | hypothetical protein                                                    |
| PA0457   |              | hypothetical protein                                                    |
| PA0501   | <i>bioF</i>  | 8-amino-7-oxononanoate synthase                                         |
| PA0706   | <i>cat</i>   | chloramphenicol acetyltransferase                                       |
| PA0744   |              | probable enoyl-CoA hydratase/isomerase                                  |
| PA0923   | <i>dinB</i>  | DNA Polymerase IV, DinB                                                 |
| PA1049   | <i>pdxH</i>  | pyridoxine 5'-phosphate oxidase                                         |
| PA1122   |              | probable peptide deformylase                                            |
| PA1240   |              | probable enoyl-CoA hydratase/isomerase                                  |
| PA1278   | <i>cobP</i>  | cobinamide kinase                                                       |
| PA1293   |              | hypothetical protein                                                    |
| PA1319   | <i>cyoC</i>  | cytochrome o ubiquinol oxidase subunit III                              |
| PA1418   |              | probable sodium:solute symport protein                                  |
| PA1433   |              | conserved hypothetical protein                                          |
| PA1535   |              | probable acyl-CoA dehydrogenase                                         |
| PA1539   |              | hypothetical protein                                                    |
| PA1585   | <i>sucA</i>  | 2-oxoglutarate dehydrogenase (E1 subunit)                               |
| PA1638   |              | conserved hypothetical protein                                          |
| PA1640   |              | conserved hypothetical protein                                          |
| PA1678   |              | probable DNA methylase                                                  |
| PA1757   | <i>thrH</i>  | homoserine kinase                                                       |
| PA1788   |              | hypothetical protein                                                    |
| PA1816   | <i>dnaQ</i>  | DNA polymerase III, epsilon chain                                       |
| PA1839   |              | hypothetical protein                                                    |
| PA1948   | <i>rbsC</i>  | membrane protein component of ABC ribose transporter                    |
| PA2437   |              | hypothetical protein                                                    |
| PA2611   | <i>cysG</i>  | siroheme synthase                                                       |
| PA2726   |              | probable radical activating enzyme                                      |
| PA2842   |              | hypothetical protein                                                    |
| PA2877   |              | probable transcriptional regulator                                      |
| PA2908   | <i>cbiD</i>  | cobalamin biosynthetic protein CbiD                                     |
| PA2958   |              | hypothetical protein                                                    |
| PA2961   | <i>holB</i>  | DNA polymerase III, delta prime subunit                                 |
| PA2995   | <i>nqrE</i>  | Na <sup>+</sup> -translocating NADH:quinone oxidoreductase subunit Nqr5 |
| PA3059   | <i>pelF</i>  | PelF                                                                    |
| PA3110   |              | hypothetical protein                                                    |
| PA3165   | <i>hisC2</i> | histidinol-phosphate aminotransferase                                   |
| PA3169   |              | 5-methylthioribose-1-phosphate isomerase MtnA                           |
| PA3268   |              | probable TonB-dependent receptor                                        |
| PA3368   |              | probable acetyltransferase                                              |
| PA3493   |              | conserved hypothetical protein                                          |
| PA3627   | <i>ygbB</i>  | 2C-methyl-D-erythritol 2,4-cyclodiphosphate synthase                    |
| PA3631   |              | conserved hypothetical protein                                          |
| PA3693   |              | conserved hypothetical protein                                          |

|        |             |                                                          |
|--------|-------------|----------------------------------------------------------|
| PA3988 |             | hypothetical protein                                     |
| PA3995 |             | probable transcriptional regulator                       |
| PA3998 |             | conserved hypothetical protein                           |
| PA4177 |             | hypothetical protein                                     |
| PA4190 | <i>pqsL</i> | probable FAD-dependent monooxygenase                     |
| PA4355 |             | probable major facilitator superfamily (MFS) transporter |
| PA4388 |             | hypothetical protein                                     |
| PA4402 | <i>argJ</i> | glutamate N-acetyltransferase                            |
| PA4908 |             | hypothetical protein                                     |
| PA5012 | <i>waaF</i> | heptosyltransferase II                                   |
| PA5038 | <i>aroB</i> | 3-dehydroquinate synthase                                |
| PA5050 | <i>priA</i> | primosomal protein N'                                    |
| PA5066 | <i>hisI</i> | phosphoribosyl-AMP cyclohydrolase                        |
| PA5193 | <i>yrfI</i> | heat shock protein HSP33                                 |
| PA5280 | <i>sss</i>  | site-specific recombinase Sss                            |
| PA5308 | <i>lrp</i>  | leucine-responsive regulatory protein                    |
| PA5451 | <i>wzm</i>  | membrane subunit of A-band LPS efflux transporter        |
| PA5552 | <i>glmU</i> | glucosamine-1-phosphate                                  |
| Pae_16 |             | 16S RNA                                                  |
| Pae_23 |             | 23S RNA                                                  |

---
