# Supplementary material for: In-Vivo Expression Profiling of Pseudomonas aeruginosa Infections Reveals Niche-Specific and Strain-Independent Transcriptional Programs
Source: PubMed Central journal article supplement (PMC3171414; doi:10.1371/journal.pone.0024235), 2011-09-12
Supplement: pone.0024235.s009.pdf [file pone.0024235.s009.pdf]

Table S9

| Burn wound infection cluster |           |           |           |           |           |           |           |           |           |           |                    | Gene name                                 | Product name |
|------------------------------|-----------|-----------|-----------|-----------|-----------|-----------|-----------|-----------|-----------|-----------|--------------------|-------------------------------------------|--------------|
|                              | bw<br>/bf | tu/<br>bf | pl/<br>bf | bw/<br>lb | tu/<br>lb | pl/<br>lb | pl/<br>bw | pl/<br>tu | tu/<br>bw | bf<br>/lb |                    |                                           |              |
| PA0059                       | +         | +         | +         | +         |           |           | -         |           | -         | -         | <i>osmC</i>        | osmotically inducible protein OsmC        |              |
| PA0060                       | +         |           |           | +         |           |           | -         |           | -         |           |                    | conserved hypothetical protein            |              |
| PA0102                       | +         | +         | +         | +         | +         | +         | -         |           |           |           |                    | probable carbonic anhydrase               |              |
| PA0104                       | +         |           |           | +         |           |           |           |           |           |           |                    | hypothetical protein                      |              |
| PA0266                       |           |           |           |           |           |           |           |           |           | +         | <i>gabT</i>        | 4-aminobutyrate aminotransferase          |              |
| PA0320                       | +         | +         |           | +         | +         |           | -         | -         |           |           |                    | conserved hypothetical protein            |              |
| PA0354                       |           |           |           | +         |           |           | -         |           |           |           |                    | conserved hypothetical protein            |              |
| <b>PA0355</b>                | +         | +         |           |           |           |           | -         | -         | -         | -         | <i>pfpI</i>        | <b>protease PfpI</b>                      |              |
| PA0376                       | +         |           |           |           |           |           |           |           |           |           | <i>rpoH</i>        | sigma factor RpoH                         |              |
| PA0423                       |           |           |           | +         |           |           | -         |           |           |           | <i>pasP</i>        | PasP                                      |              |
| PA0532                       | +         |           |           | +         |           |           | -         |           | -         |           |                    | hypothetical protein                      |              |
| PA0553                       | +         |           |           |           |           |           | -         | -         |           | -         |                    | hypothetical protein                      |              |
| PA0567                       | +         |           |           |           | -         | -         | -         |           | -         | -         |                    | conserved hypothetical protein            |              |
| PA0672                       | +         |           |           |           |           |           | -         |           | -         |           | <i>hemO</i>        | heme oxygenase                            |              |
| <b>PA0707</b>                | +         |           |           | +         |           |           | -         |           | -         |           | <b><i>toxR</i></b> | <b>transcriptional regulator ToxR</b>     |              |
| PA0763                       | +         |           |           |           |           |           | -         |           |           |           | <i>mucA</i>        | anti-sigma factor MucA                    |              |
| PA0779                       |           |           |           | +         |           |           | -         |           |           |           |                    | probable ATP-dependent protease           |              |
| PA1134                       | +         |           |           | +         |           |           |           |           | -         |           |                    | hypothetical protein                      |              |
| PA1245                       |           |           |           |           | -         | -         |           |           |           |           | <i>aprX</i>        | AprX                                      |              |
| PA1320                       |           |           |           |           |           |           | -         |           |           |           | <i>cyoD</i>        | cytochrome o ubiquinol oxidase subunit IV |              |
| PA1323                       | +         | +         | +         |           |           |           |           |           |           | -         |                    | hypothetical protein                      |              |
| PA1324                       | +         |           |           | +         |           |           | -         |           | -         |           |                    | hypothetical protein                      |              |
| PA1500                       |           |           |           |           |           |           | -         |           |           |           |                    | probable oxidoreductase                   |              |
| PA1515                       | +         |           |           | +         |           |           | -         |           |           |           | <i>alc</i>         | allantoicase                              |              |
| PA1518                       | +         |           |           | +         |           |           | -         |           | -         |           |                    | conserved hypothetical protein            |              |
| PA1579                       | +         |           |           |           |           |           |           |           | -         |           |                    | hypothetical protein                      |              |
| PA1596                       |           |           | -         | +         |           |           | -         | -         |           |           | <i>htpG</i>        | heat shock protein HtpG                   |              |
| PA1870                       | +         |           |           | +         |           |           | -         |           | -         |           |                    | hypothetical protein                      |              |
| PA1925                       |           |           |           |           | +         |           |           | -         |           |           |                    | hypothetical protein                      |              |

|        |   |   |   |   |   |   |   |   |             |                                                      |
|--------|---|---|---|---|---|---|---|---|-------------|------------------------------------------------------|
| PA2000 | + |   | + |   | - |   |   |   | <i>dhcB</i> | DhcB, dehydrocarnitine CoA transferase, subunit B    |
| PA2033 | + |   |   |   |   |   |   |   |             | hypothetical protein                                 |
| PA2034 | + |   |   |   | - | - | - |   |             | hypothetical protein                                 |
| PA2108 | + |   |   | + |   |   | - |   |             | probable decarboxylase                               |
| PA2116 |   |   |   | - |   |   |   |   |             | conserved hypothetical protein                       |
| PA2134 | + | + | + | + |   |   | - |   |             | <b>hypothetical protein</b>                          |
| PA2135 | + |   |   | + |   |   | - |   |             | <b>probable transporter</b>                          |
| PA2140 | + |   |   | + |   |   | - |   |             | <b>probable metallothionein</b>                      |
| PA2141 | + |   |   | + |   |   | - |   |             | hypothetical protein                                 |
| PA2142 | + |   |   | + |   |   | - |   |             | <b>probable short-chain dehydrogenase</b>            |
| PA2143 | + | + | + | + |   |   | - |   |             | hypothetical protein                                 |
| PA2144 | + |   |   | + |   |   | - |   |             | <i>glgP</i>                                          |
| PA2145 | + |   |   | + |   |   | - |   |             | hypothetical protein                                 |
| PA2146 | + | + | + | + |   | - |   | + |             | conserved hypothetical protein                       |
| PA2147 | + |   |   | + |   |   | - |   |             | <i>katE</i>                                          |
| PA2148 | + |   |   | + |   |   | - |   |             | conserved hypothetical protein                       |
| PA2149 | + |   |   | + |   | - |   |   |             | hypothetical protein                                 |
| PA2150 | + |   |   | + |   |   | - |   |             | conserved hypothetical protein                       |
| PA2151 | + |   |   | + |   |   | - |   |             | conserved hypothetical protein                       |
| PA2152 | + |   | + | + |   |   | - |   |             | probable trehalose synthase                          |
| PA2153 | + |   |   | + |   |   |   |   |             | <i>glgB</i>                                          |
| PA2157 | + |   |   | + |   |   | - |   |             | hypothetical protein                                 |
| PA2158 | + |   |   | + |   |   | - |   |             | <b>probable alcohol dehydrogenase (Zn-dependent)</b> |
| PA2159 | + |   | + | + |   | - | - |   |             | conserved hypothetical protein                       |
| PA2160 | + |   |   | + |   |   | - |   |             | <i>glgX</i>                                          |
| PA2161 | + |   |   | + |   |   | - |   |             | <i>0</i>                                             |
| PA2164 | + |   |   | + |   |   | - |   |             | probable glycosyl hydrolase                          |
| PA2165 | + |   |   | + |   |   | - |   |             | <i>glgA</i>                                          |
| PA2167 | + |   |   | + |   |   | - |   |             | hypothetical protein                                 |
| PA2168 | + | + |   | + |   |   | - |   |             | hypothetical protein                                 |
| PA2169 | + | + | + | + |   |   | - |   |             | hypothetical protein                                 |
| PA2170 | + | + | + | + |   |   | - |   |             | hypothetical protein                                 |
| PA2171 | + | + |   | + |   |   | - |   |             | hypothetical protein                                 |

|        |   |   |   |   |   |   |   |   |   |                                                                               |                                        |
|--------|---|---|---|---|---|---|---|---|---|-------------------------------------------------------------------------------|----------------------------------------|
| PA2172 | + | + | + | + |   | - |   |   | - | hypothetical protein                                                          |                                        |
| PA2173 | + | + | + |   |   | - |   |   | - | hypothetical protein                                                          |                                        |
| PA2176 | + |   |   | + |   | - |   |   |   | hypothetical protein                                                          |                                        |
| PA2178 | + |   |   | + |   | - |   |   |   | hypothetical protein                                                          |                                        |
| PA2180 | + |   |   | + |   | - |   | - |   | hypothetical protein                                                          |                                        |
| PA2181 | + |   |   | + |   | - |   |   |   | hypothetical protein                                                          |                                        |
| PA2182 | + |   |   |   |   | - |   |   |   | hypothetical protein                                                          |                                        |
| PA2183 | + |   |   | + |   | - |   |   |   | hypothetical protein                                                          |                                        |
| PA2184 | + |   |   |   |   | - |   |   |   | conserved hypothetical protein                                                |                                        |
| PA2187 | + |   |   | + |   | - |   |   |   | hypothetical protein                                                          |                                        |
| PA2189 | + |   |   |   |   | - |   |   |   | hypothetical protein                                                          |                                        |
| PA2190 | + | + | + | + |   | - |   | - | - | conserved hypothetical protein                                                |                                        |
| PA2192 | + |   |   | + |   | - | - | - |   | conserved hypothetical protein                                                |                                        |
| PA2383 | + |   | + | + |   |   |   |   |   | probable transcriptional regulator                                            |                                        |
| PA2384 | + |   | + | + |   |   |   | + | - | hypothetical protein                                                          |                                        |
| PA2385 | + |   |   | + |   | - |   |   | - | <i>pvdQ</i><br>3-oxo-C12-homoserine lactone acylase PvdQ                      |                                        |
| PA2386 | + |   |   | + |   | - |   |   |   | <i>pvdA</i><br>L-ornithine N5-oxygenase                                       |                                        |
| PA2393 | + |   |   | + |   | - |   |   |   | probable dipeptidase precursor                                                |                                        |
| PA2394 |   |   |   |   |   | - |   |   | - | <i>pvdN</i><br>PvdN                                                           |                                        |
| PA2405 | + |   | + | + |   | + |   |   | - | hypothetical protein                                                          |                                        |
| PA2411 | + | + | + | + |   | + |   |   | - | probable thioesterase                                                         |                                        |
| PA2412 | + | + | + | + |   | + |   | + | - | conserved hypothetical protein                                                |                                        |
| PA2413 | + |   |   | + |   |   | - |   | - | <i>pvdH</i><br>L-2,4-diaminobutyrate:2-ketoglutarate 4-aminotransferase, PvdH |                                        |
| PA2414 | + |   |   |   |   | - | - | - | - | L-sorbose dehydrogenase                                                       |                                        |
| PA2424 | + |   |   | + |   |   |   |   |   | <i>pvdL</i><br>PvdL                                                           |                                        |
| PA2485 |   |   |   | + |   |   |   |   |   | hypothetical protein                                                          |                                        |
| PA2486 | + |   |   | + |   | - |   |   | - | hypothetical protein                                                          |                                        |
| PA2634 |   |   |   | + |   | - |   |   |   | <i>aceA</i><br>isocitrate lyase AceA                                          |                                        |
| PA2694 | + |   |   | + |   | - |   |   |   | probable thioredoxin                                                          |                                        |
| PA3041 | + | + | + |   |   |   |   |   | - | hypothetical protein                                                          |                                        |
| PA3042 | + |   |   |   |   | - | - |   | - | hypothetical protein                                                          |                                        |
| PA3126 |   |   | - | + | + |   | - | - |   | +                                                                             | <i>ibpA</i><br>heat-shock protein IbpA |
| PA3231 | + | + | + |   |   | - |   |   | - | -                                                                             | hypothetical protein                   |



|               |   |   |   |   |   |   |   |   |              |                                             |
|---------------|---|---|---|---|---|---|---|---|--------------|---------------------------------------------|
| PA4467        | + |   |   | - |   | + | - | - |              | hypothetical protein                        |
| <b>PA4468</b> | + | + | + | - | - | + | - | - | <i>sodM</i>  | <b>superoxide dismutase</b>                 |
| PA4469        | + |   |   | - | - |   | - | - |              | hypothetical protein                        |
| <b>PA4470</b> | + |   |   | - |   | + | - | - | <i>fumC1</i> | <b>fumarate hydratase</b>                   |
| PA4570        | + |   |   | - |   | + | - | - |              | hypothetical protein                        |
| <b>PA4661</b> | + |   |   |   | - |   | - |   | <i>pagL</i>  | <b>Lipid A 3-O-deacylase</b>                |
| PA4738        |   |   |   |   |   |   | - |   |              | conserved hypothetical protein              |
| PA4739        |   |   |   |   |   |   | - |   |              | conserved hypothetical protein              |
| PA4761        | + | + |   | + | + |   | - | - | <i>dnaK</i>  | DnaK protein                                |
| PA4834        | + |   |   | + |   |   | - | - |              | hypothetical protein                        |
| PA4835        | + |   |   | + |   |   | - | - |              | hypothetical protein                        |
| PA4836        | + |   |   | + |   |   | - | - |              | hypothetical protein                        |
| PA4837        | + |   |   | + |   |   | - | - |              | probable outer membrane protein precursor   |
| PA4838        | + |   |   | + |   |   | - | - |              | hypothetical protein                        |
| PA4877        | + | + |   |   |   |   | - | - |              | hypothetical protein                        |
| PA4896        | + |   |   | + |   |   | - | - |              | probable sigma-70 factor, ECF subfamily     |
| PA4936        | + |   |   |   |   |   |   |   | <i>spoU</i>  | probable rRNA methylase                     |
| PA5053        |   |   |   | - | + |   | - |   | <i>hslV</i>  | heat shock protein HslV                     |
| PA5054        |   |   |   | - | + | + | - | + | <i>hslU</i>  | heat shock protein HslU                     |
| PA5060        | + |   |   |   |   |   | - |   | <i>phaF</i>  | polyhydroxyalkanoate synthesis protein PhaF |
| PA5150        | + |   | + |   |   |   |   |   |              | probable short-chain dehydrogenase          |
| PA5340        |   |   |   | + |   | + |   | + |              | hypothetical protein                        |
| PA5388        | + | + |   | + | + |   | - | - |              | hypothetical protein                        |
| PA5481        | + |   |   | + |   |   | - | - |              | hypothetical protein                        |
| PA5499        | + |   |   | + |   |   | - | - | <i>np20</i>  | transcriptional regulator np20              |
| PA5501        |   |   |   |   |   |   |   | + | <i>znuB</i>  | permease of ABC zinc transporter ZnuB       |
| PA5534        |   |   |   | + |   |   | - | - |              | hypothetical protein                        |
| PA5535        | + |   |   | + |   |   | - | - |              | conserved hypothetical protein              |
| PA5536        | + |   |   | + |   |   | - | - |              | conserved hypothetical protein              |
| PA5537        | + |   |   | + |   |   | - | - |              | hypothetical protein                        |
| PA5538        | + |   |   | + |   |   | - | - | <i>amiA</i>  | N-acetylmuramoyl-L-alanine amidase          |
| PA5539        | + |   |   | + |   |   | - | - |              | hypothetical protein                        |
| PA5540        | + |   |   | + |   |   | - | - |              | hypothetical protein                        |

PA5541    +                    +                    -                    -                    *pyrQ*    dihydroorotase

| Plant infection cluster |           |           |           |           |           |           |           |           |           |           |   |  |                                                     |
|-------------------------|-----------|-----------|-----------|-----------|-----------|-----------|-----------|-----------|-----------|-----------|---|--|-----------------------------------------------------|
|                         | bw<br>/bf | tu/<br>bf | pl/<br>bf | bw/<br>lb | tu/<br>lb | pl/<br>lb | pl/<br>bw | pl/<br>tu | tu/<br>bw | bf/<br>lb |   |  |                                                     |
| PA0011                  |           |           |           |           |           | +         | +         |           |           |           |   |  | probable 2-OH-lauroyltransferase                    |
| PA0035                  |           |           | +         |           |           | +         | +         |           |           |           |   |  | <i>trpA</i> tryptophan synthase alpha chain         |
| PA0036                  |           |           |           |           |           |           | +         |           |           |           |   |  | <i>trpB</i> tryptophan synthase beta chain          |
| PA0201                  |           |           | +         |           |           | +         | +         |           |           |           |   |  | hypothetical protein                                |
| PA0226                  |           |           |           |           |           | +         |           |           |           |           |   |  | probable CoA transferase, subunit A                 |
| PA0276                  |           | +         | +         |           | +         | +         | +         |           |           | +         |   |  | hypothetical protein                                |
| <b>PA0280</b>           |           |           | +         |           |           | +         | +         | +         |           |           |   |  | <i>cysA</i> <b>sulfate transport protein CysA</b>   |
| <b>PA0281</b>           |           |           | +         |           |           | +         | +         | +         |           |           |   |  | <i>cysW</i> <b>sulfate transport protein CysW</b>   |
| <b>PA0282</b>           |           |           | +         |           |           | +         | +         |           |           |           |   |  | <i>cysT</i> <b>sulfate transport protein CysT</b>   |
| <b>PA0283</b>           |           |           | +         |           |           | +         | +         | +         |           |           |   |  | <i>sbp</i> <b>sulfate-binding protein precursor</b> |
| PA0284                  |           |           | +         |           |           | +         | +         | +         |           |           |   |  | hypothetical protein                                |
| PA0286                  |           |           | +         |           |           | +         | +         | +         |           |           |   |  | <i>desA</i> delta-9 fatty acid desaturase, DesA     |
| <b>PA0296</b>           |           |           |           |           |           |           |           | +         |           |           |   |  | <i>spuI</i> <b>probable glutamine synthetase</b>    |
| <b>PA0298</b>           |           |           | +         |           |           | +         | +         | +         |           |           |   |  | <i>spuB</i> <b>probable glutamine synthetase</b>    |
| PA0385                  | -         | -         |           |           |           | +         | +         | +         |           |           | + |  | hypothetical protein                                |
| PA0386                  |           |           |           |           |           | +         |           |           |           |           |   |  | probable oxidase                                    |
| PA0436                  |           |           |           |           |           | +         |           | +         |           |           |   |  | probable transcriptional regulator                  |
| PA0439                  |           |           | +         |           |           | +         | +         |           |           |           |   |  | probable oxidoreductase                             |
| PA0441                  |           |           | +         |           |           | +         | +         | +         |           |           |   |  | <i>dht</i> dihydropyrimidinase                      |
| PA0444                  |           |           |           |           |           | +         | +         | +         |           |           |   |  | N-carbamoyl-beta-alanine amidohydrolase             |
| PA0451                  |           |           | +         |           |           | +         | +         | +         |           |           |   |  | conserved hypothetical protein                      |
| PA0456                  | -         | -         | +         |           |           | +         | +         | +         |           | -         | + |  | probable cold-shock protein                         |
| PA0472                  | +         |           | +         |           | -         | +         |           | +         |           | -         | - |  | <i>fiuI</i> probable sigma-70 factor, ECF subfamily |
| PA0473                  |           |           |           |           |           |           | +         |           |           |           |   |  | <i>psfA</i> probable glutathione S-transferase      |
| PA0485                  |           |           |           |           |           | +         | +         |           |           |           |   |  | conserved hypothetical protein                      |
| PA0505                  |           | -         | +         | -         | -         | +         | +         | +         |           | -         | - |  | hypothetical protein                                |
| PA0547                  |           |           |           |           |           |           |           | +         |           |           |   |  | probable transcriptional regulator                  |
| PA0608                  | -         |           |           |           |           | +         |           |           |           |           | + |  | <i>gph</i> probable phosphoglycolate phosphatase    |

|               |  |   |  |   |  |  |  |  |  |              |                                                          |
|---------------|--|---|--|---|--|--|--|--|--|--------------|----------------------------------------------------------|
| PA0676        |  |   |  |   |  |  |  |  |  | <i>vreR</i>  | sigma factor regulator, VreR                             |
| PA0730        |  |   |  |   |  |  |  |  |  |              | probable transferase                                     |
| <b>PA0734</b> |  | + |  |   |  |  |  |  |  |              | <b>hypothetical protein</b>                              |
| PA0801        |  | + |  |   |  |  |  |  |  |              | hypothetical protein                                     |
| PA0802        |  | + |  | - |  |  |  |  |  |              | hypothetical protein                                     |
| PA0810        |  | + |  |   |  |  |  |  |  |              | probable haloacid dehalogenase                           |
| PA0814        |  | + |  |   |  |  |  |  |  |              | conserved hypothetical protein                           |
| PA0815        |  | + |  |   |  |  |  |  |  |              | probable transcriptional regulator                       |
| PA0817        |  | + |  |   |  |  |  |  |  |              | probable ring-cleaving dioxygenase                       |
| PA0837        |  | + |  |   |  |  |  |  |  | <i>slyD</i>  | peptidyl-prolyl cis-trans isomerase SlyD                 |
| PA0851        |  | + |  |   |  |  |  |  |  |              | hypothetical protein                                     |
| PA0862        |  | + |  |   |  |  |  |  |  |              | hypothetical protein                                     |
| PA0929        |  | - |  |   |  |  |  |  |  | <i>pirR</i>  | two-component response regulator                         |
| PA0936        |  | - |  |   |  |  |  |  |  | <i>lpxO2</i> | lipopolysaccharide biosynthetic protein LpxO2            |
| PA0995        |  | + |  |   |  |  |  |  |  | <i>ogt</i>   | methylated-DNA--protein-cysteine methyltransferase       |
| PA1060        |  | + |  |   |  |  |  |  |  |              | hypothetical protein                                     |
| PA1075        |  | + |  |   |  |  |  |  |  |              | hypothetical protein                                     |
| PA1092        |  | - |  |   |  |  |  |  |  |              |                                                          |
| PA1101        |  |   |  |   |  |  |  |  |  | <i>fliC</i>  | flagellin type B                                         |
| PA1101        |  |   |  |   |  |  |  |  |  | <i>fliF</i>  | Flagella M-ring outer membrane protein precursor         |
| PA1190        |  | + |  | - |  |  |  |  |  |              | conserved hypothetical protein                           |
| PA1192        |  |   |  |   |  |  |  |  |  |              | conserved hypothetical protein                           |
| PA1296        |  |   |  |   |  |  |  |  |  |              | probable 2-hydroxyacid dehydrogenase                     |
| PA1377        |  | + |  |   |  |  |  |  |  |              | conserved hypothetical protein                           |
| PA1440        |  | + |  |   |  |  |  |  |  |              | hypothetical protein                                     |
| PA1452        |  |   |  |   |  |  |  |  |  | <i>flhA</i>  | flagellar biosynthesis protein FlhA                      |
| PA1505        |  | + |  |   |  |  |  |  |  | <i>moaA2</i> | molybdopterin biosynthetic protein A2                    |
| PA1626        |  | + |  |   |  |  |  |  |  |              | probable major facilitator superfamily (MFS) transporter |
| PA1630        |  | + |  |   |  |  |  |  |  |              | probable transcriptional regulator                       |
| PA1632        |  |   |  |   |  |  |  |  |  | <i>kdpF</i>  | KdpF protein                                             |
| PA1651        |  | + |  |   |  |  |  |  |  |              | probable transporter                                     |
| PA1676        |  | + |  |   |  |  |  |  |  |              | hypothetical protein                                     |
| PA1677        |  | + |  | - |  |  |  |  |  |              | conserved hypothetical protein                           |
| PA1730        |  | + |  |   |  |  |  |  |  |              | conserved hypothetical protein                           |

|               |   |   |   |   |   |   |             |                                                                                              |                                                        |
|---------------|---|---|---|---|---|---|-------------|----------------------------------------------------------------------------------------------|--------------------------------------------------------|
| PA1775        |   | + |   | + | + | - | <i>cmpX</i> | conserved cytoplasmic membrane protein, CmpX protein                                         |                                                        |
| PA1776        | - |   | - |   | + |   | <i>sigX</i> | ECF sigma factor SigX                                                                        |                                                        |
| PA1778        |   | + |   | + | + | + | <i>cobA</i> | uroporphyrin-III C-methyltransferase                                                         |                                                        |
| <b>PA1779</b> |   | + |   | + | + |   |             | <b>assimilatory nitrate reductase</b>                                                        |                                                        |
| <b>PA1780</b> |   | + |   | + | + | + | <i>nirD</i> | <b>assimilatory nitrite reductase small subunit</b>                                          |                                                        |
| <b>PA1781</b> |   | + |   | + | + |   | <i>nirB</i> | <b>assimilatory nitrite reductase large subunit</b>                                          |                                                        |
| <b>PA1782</b> |   |   |   | + | + |   |             | <b>probable serine/threonine-protein kinase</b>                                              |                                                        |
| <b>PA1783</b> |   | + |   | + |   |   | <i>nasA</i> | <b>nitrate transporter</b>                                                                   |                                                        |
| PA1800        |   |   |   | + |   | + | <i>tig</i>  | trigger factor                                                                               |                                                        |
| PA1814        |   | + |   |   | + | + |             | hypothetical protein                                                                         |                                                        |
| PA1837        |   | + |   | + | + |   |             | hypothetical protein                                                                         |                                                        |
| <b>PA1838</b> |   | + |   | + | + | + | <i>cysI</i> | <b>sulfite reductase</b>                                                                     |                                                        |
| PA1856        |   | + |   | + | + | + |             | probable cytochrome oxidase subunit                                                          |                                                        |
| PA1927        |   | + |   | + | + | + | <i>metE</i> | 5-methyltetrahydropteroyltriglutamate-homocysteine S-methyltransferase                       |                                                        |
| PA1950        |   | + |   |   | + |   | <i>rbsK</i> | ribokinase                                                                                   |                                                        |
| PA1963        |   | + |   | + | + | + |             | hypothetical protein                                                                         |                                                        |
| PA1984        |   | + |   | + | + | + | +           | <i>exaC</i>                                                                                  | NAD <sup>+</sup> dependent aldehyde dehydrogenase ExaC |
| PA1998        |   | + |   | + |   |   | <i>dhcR</i> | DhcR, transcriptional regulator                                                              |                                                        |
| PA2019        |   |   |   | + | + | + | <i>amrA</i> | Resistance-Nodulation-Cell Division (RND) multidrug efflux membrane fusion protein precursor |                                                        |
| PA2030        |   | + | - | + | + | + | -           |                                                                                              | hypothetical protein                                   |
| PA2031        | + | + |   | + | + | + |             | hypothetical protein                                                                         |                                                        |
| PA2045        |   | + |   | + | + | + |             | conserved hypothetical protein                                                               |                                                        |
| PA2092        |   | + |   | + |   |   |             | probable major facilitator superfamily (MFS) transporter                                     |                                                        |
| PA2229        |   | + |   | + | + |   |             | conserved hypothetical protein                                                               |                                                        |
| PA2259        |   | + |   | + | + | + | <i>ptxS</i> | transcriptional regulator PtxS                                                               |                                                        |
| PA2260        |   | + |   | + | + | + |             | hypothetical protein                                                                         |                                                        |
| PA2261        |   | + |   | + | + |   |             | probable 2-ketogluconate kinase                                                              |                                                        |
| PA2263        |   | + |   | + | + | + |             | probable 2-hydroxyacid dehydrogenase                                                         |                                                        |
| PA2306        |   | + |   | + | + | + | <i>ambA</i> | AmbA                                                                                         |                                                        |
| PA2322        |   | + |   | + | + |   |             | gluconate permease                                                                           |                                                        |
| PA2380        |   | + |   | + | + | + |             | hypothetical protein                                                                         |                                                        |
| PA2484        |   | + |   |   | + | + |             | conserved hypothetical protein                                                               |                                                        |







|               |   |   |   |   |   |   |   |   |   |              |                                                       |
|---------------|---|---|---|---|---|---|---|---|---|--------------|-------------------------------------------------------|
| PA4147        |   | + |   |   | + | + | + |   |   | <i>acoR</i>  | transcriptional regulator AcoR                        |
| PA4176        |   | + |   |   | + |   |   |   |   | <i>ppiC2</i> | peptidyl-prolyl cis-trans isomerase C2                |
| PA4245        | - |   |   |   | + |   |   | + |   | <i>rpmD</i>  | 50S ribosomal protein L30                             |
| PA4248        | - |   | + |   | + |   | + | + |   | <i>rplF</i>  | 50S ribosomal protein L6                              |
| PA4262        |   |   |   |   | + |   |   | + |   | <i>rplD</i>  | 50S ribosomal protein L4                              |
| PA4263        | - |   |   |   | + |   |   | + |   | <i>rplC</i>  | 50S ribosomal protein L3                              |
| PA4293        |   | + | - |   |   |   | + | + |   | <i>pprA</i>  | two-component sensor PprA                             |
| PA4326        |   | + |   |   | + | + | + |   |   |              | hypothetical protein                                  |
| PA4379        |   | + |   | - |   |   | + | - |   |              | conserved hypothetical protein                        |
| <b>PA4442</b> |   | + |   |   | + | + |   |   |   | <i>cysN</i>  | <b>ATP sulfurylase GTP-binding subunit/APS kinase</b> |
| <b>PA4443</b> |   | + |   |   | + | + | + |   |   | <i>cysD</i>  | <b>ATP sulfurylase small subunit</b>                  |
| PA4544        |   |   |   |   | + |   |   |   |   | <i>rluD</i>  | pseudouridine synthase                                |
| PA4567        | - | - |   | - | + | + | + | - | + | <i>rpmA</i>  | 50S ribosomal protein L27                             |
| PA4575        | + | + | + |   |   | + |   |   | - |              | hypothetical protein                                  |
| PA4602        | - | - |   |   | + | + | + |   | + | <i>glyA3</i> | serine hydroxymethyltransferase                       |
| PA4630        |   | + |   |   | + | + | + |   |   |              | hypothetical protein                                  |
| PA4637        |   | + |   |   | + | + | + |   |   |              | hypothetical protein                                  |
| PA4666        |   |   |   |   | + |   |   |   |   | <i>hemA</i>  | glutamyl-tRNA reductase                               |
| <b>PA4726</b> |   | + |   |   | + | + | + |   |   | <i>cbrB</i>  | <b>two-component response regulator CbrB</b>          |
| PA4742        |   |   |   |   | + |   |   |   | + | <i>truB</i>  | tRNA pseudouridine 55 synthase                        |
| PA4748        |   |   |   |   | + | + |   |   | + | <i>tpiA</i>  | triosephosphate isomerase                             |
| PA4750        |   |   |   |   | + |   |   |   |   | <i>folP</i>  | dihydropteroate synthase                              |
| PA4758        |   |   |   |   | + |   |   |   |   | <i>carA</i>  | carbamoyl-phosphate synthase small chain              |
| PA4780        |   | + | - |   |   |   | + | + |   |              | conserved hypothetical protein                        |
| PA4852        |   |   |   |   | + | + | + |   |   |              | conserved hypothetical protein                        |
| PA4859        |   | + |   |   | + |   |   |   |   |              | probable permease of ABC transporter                  |
| PA4870        |   | + |   |   | + | + | + |   |   |              | conserved hypothetical protein                        |
| PA4881        |   | + | + |   | + | + | + | + | + |              | hypothetical protein                                  |
| PA4933        |   |   |   |   | + | + |   |   | + |              | hypothetical protein                                  |
| PA4939        |   |   |   |   | + | + | + |   | + |              | conserved hypothetical protein                        |
| PA4940        | - | - |   | - | + | + | + | - |   |              | conserved hypothetical protein                        |
| PA5028        |   | + |   |   | + | + |   |   |   |              | conserved hypothetical protein                        |
| PA5048        |   | + |   |   | + | + | + |   |   |              | probable nuclease                                     |



|               |   |   |   |   |   |   |   |                                        |                                                            |
|---------------|---|---|---|---|---|---|---|----------------------------------------|------------------------------------------------------------|
| PA0534        |   |   |   |   | - |   |   | conserved hypothetical protein         |                                                            |
| PA0545        |   | + |   | + | - |   | + | hypothetical protein                   |                                                            |
| PA0572        |   |   |   | + | - |   |   | hypothetical protein                   |                                                            |
| PA0713        | - | + | - | + | - |   | + | hypothetical protein                   |                                                            |
| PA0715        |   |   |   |   | - |   |   | hypothetical protein                   |                                                            |
| PA0716        |   |   |   |   | - |   |   | hypothetical protein                   |                                                            |
| PA0781        | + | + |   | + | + |   |   | hypothetical protein                   |                                                            |
| PA0822        |   |   |   |   | - |   |   | hypothetical protein                   |                                                            |
| PA0835        |   |   |   |   | - |   | + | <i>pta</i> phosphate acetyltransferase |                                                            |
| <b>PA0836</b> |   | + |   | + | - |   | + | <b><i>ackA</i> acetate kinase</b>      |                                                            |
| PA0864        |   | + |   | + | - |   | + | probable transcriptional regulator     |                                                            |
| PA0874        |   |   |   |   | - |   |   | hypothetical protein                   |                                                            |
| PA0952        | - |   | - | + | - |   | + | +                                      | hypothetical protein                                       |
| PA0962        | + | + |   |   | - | - |   |                                        | probable dna-binding stress protein                        |
| PA0977        |   |   |   |   | - |   |   |                                        | hypothetical protein                                       |
| PA0985        |   |   |   |   | - |   |   |                                        | <i>pyoS5</i> pyocin S5                                     |
| PA1029        | + | + | + | + | - |   | + |                                        | hypothetical protein                                       |
| PA1126        |   |   |   | + | - |   |   |                                        | hypothetical protein                                       |
| PA1127        |   | + |   |   | - |   |   |                                        | probable oxidoreductase                                    |
| PA1131        |   | - |   |   | + | + |   |                                        | probable major facilitator superfamily (MFS) transporter   |
| PA1195        |   | + |   | + | - |   | + |                                        | hypothetical protein                                       |
| PA1329        |   |   |   |   | - |   |   |                                        | conserved hypothetical protein                             |
| PA1337        |   | + |   |   |   |   |   |                                        | <i>ansB</i> glutaminase-asparaginase                       |
| PA1369        |   |   |   |   | - | - |   |                                        | hypothetical protein                                       |
| PA1370        |   |   |   |   | - | - |   |                                        | hypothetical protein                                       |
| PA1371        |   |   |   |   | - | - |   |                                        | hypothetical protein                                       |
| PA1372        |   |   |   |   | - | - |   |                                        | hypothetical protein                                       |
| PA1388        |   | + |   | + | - |   | + |                                        | hypothetical protein                                       |
| PA1429        |   | + |   | + | - |   | + |                                        | probable cation-transporting P-type ATPase                 |
| PA1555        | - |   | - | + | - | - | + | +                                      | <i>ccoP2</i> Cytochrome c oxidase, cbb3-type, CcoP subunit |
| PA1557        | - |   | - | + | - | - | + | +                                      | <i>ccoN2</i> Cytochrome c oxidase, cbb3-type, CcoN subunit |
| PA1664        |   |   |   |   | - | - |   |                                        | hypothetical protein                                       |
| PA1673        |   | + |   | + | - | - | + |                                        | hypothetical protein                                       |

|        |   |   |  |   |              |                                                          |
|--------|---|---|--|---|--------------|----------------------------------------------------------|
| PA1692 |   |   |  |   | <i>pscS</i>  | probable translocation protein in type III secretion     |
| PA1696 |   |   |  |   | <i>pscO</i>  | translocation protein in type III secretion              |
| PA1699 |   |   |  |   | <i>pcr1</i>  | Pcr1                                                     |
| PA1700 |   | + |  |   | <i>pcr2</i>  | Pcr2                                                     |
| PA1701 | - |   |  |   | <i>pcr3</i>  | Pcr3                                                     |
| PA1706 |   | + |  |   | <i>pcrV</i>  | type III secretion protein PcrV                          |
| PA1707 |   | + |  |   | <i>pcrH</i>  | regulatory protein PcrH                                  |
| PA1708 |   | + |  |   | <i>popB</i>  | translocator protein PopB                                |
| PA1709 |   | + |  |   | <i>popD</i>  | Translocator outer membrane protein PopD precursor       |
| PA1711 |   | + |  |   | <i>exsE</i>  | ExsE                                                     |
| PA1714 | - |   |  |   | <i>exsD</i>  | ExsD                                                     |
| PA1715 |   | + |  |   | <i>pscB</i>  | type III export apparatus protein                        |
| PA1716 |   | + |  |   | <i>pscC</i>  | Type III secretion outer membrane protein PscC precursor |
| PA1717 |   | + |  |   | <i>pscD</i>  | type III export protein PscD                             |
| PA1718 |   | + |  |   | <i>pscE</i>  | type III export protein PscE                             |
| PA1719 |   | + |  | - | <i>pscF</i>  | type III export protein PscF                             |
| PA1720 |   | + |  |   | <i>pscG</i>  | type III export protein PscG                             |
| PA1721 |   | + |  |   | <i>pscH</i>  | type III export protein PscH                             |
| PA1722 |   | + |  |   | <i>pscI</i>  | type III export protein PscI                             |
| PA1723 |   | + |  |   | <i>pscJ</i>  | type III export protein PscJ                             |
| PA1724 |   | + |  |   | <i>pscK</i>  | type III export protein PscK                             |
| PA1734 |   | + |  |   |              | hypothetical protein                                     |
| PA1746 |   | + |  |   |              | hypothetical protein                                     |
| PA1789 |   | + |  |   |              | hypothetical protein                                     |
| PA1869 | - |   |  |   |              | probable acyl carrier protein                            |
| PA1901 |   |   |  | - | <i>phzC2</i> | phenazine biosynthesis protein PhzC                      |
| PA1904 |   |   |  |   | <i>phzF2</i> | probable phenazine biosynthesis protein                  |
| PA1934 |   |   |  |   |              | hypothetical protein                                     |
| PA2037 |   |   |  |   |              | hypothetical protein                                     |
| PA2102 |   |   |  |   |              | hypothetical protein                                     |
| PA2119 |   | + |  |   | <i>adh</i>   | alcohol dehydrogenase (Zn-dependent)                     |
| PA2127 |   |   |  |   |              | conserved hypothetical protein                           |
| PA2128 |   | + |  |   | <i>cupA1</i> | fimbrial subunit CupA1                                   |

|               |   |   |   |   |   |   |              |                                                                                        |
|---------------|---|---|---|---|---|---|--------------|----------------------------------------------------------------------------------------|
| PA2186        |   | + |   | - | - |   |              | hypothetical protein                                                                   |
| <b>PA2191</b> | + |   | + | - | - | + | <i>exoY</i>  | <b>adenylate cyclase ExoY</b>                                                          |
| PA2392        | + |   | + | - | - |   | <i>pvdP</i>  | PvdP                                                                                   |
| PA2436        | + |   | + | - | - |   |              | hypothetical protein                                                                   |
| PA2460        | + |   | + | - | - |   |              | hypothetical protein                                                                   |
| PA2461        |   |   |   | - | - |   |              | hypothetical protein                                                                   |
| PA2576        | + |   | + | - | - |   |              | hypothetical protein                                                                   |
| PA2730        |   |   |   | - | - |   |              | hypothetical protein                                                                   |
| PA2733        |   |   |   | - | - |   |              | conserved hypothetical protein                                                         |
| PA2734        |   |   |   | - | - |   |              | hypothetical protein                                                                   |
| PA2753        | + |   | + | - | - | + |              | hypothetical protein                                                                   |
| PA2819        |   |   |   | - | - |   |              | hypothetical protein                                                                   |
| PA2825        |   |   |   | - | - |   | <i>ospR</i>  | OspR                                                                                   |
| PA2826        | + |   |   | - | - |   |              | probable glutathione peroxidase                                                        |
| PA2931        | + |   | + | - | - | + | <i>cifR</i>  | CifR                                                                                   |
| PA3115        |   |   | + | - | - | + | <i>fimV</i>  | Motility protein FimV                                                                  |
| PA3140        |   |   |   | - | - |   |              | hypothetical protein                                                                   |
| PA3144        | + |   |   |   |   |   |              | hypothetical protein                                                                   |
| <b>PA3147</b> |   |   | + | - | - | + | <i>wbpJ</i>  | <b>probable glycosyl transferase WbpJ</b>                                              |
| <b>PA3148</b> | + |   | + | - | - | + | <i>wbpI</i>  | <b>UDP-N-acetylglucosamine 2-epimerase WbpI</b>                                        |
| <b>PA3149</b> |   |   | + | - | - |   | <i>wbpH</i>  | <b>probable glycosyltransferase WbpH</b>                                               |
| <b>PA3150</b> | + |   | + | - | - | + | <i>wbpG</i>  | <b>LPS biosynthesis protein WbpG</b>                                                   |
| <b>PA3151</b> | + |   | + | - | - |   | <i>hisF2</i> | <b>imidazoleglycerol-phosphate synthase, cyclase subunit</b>                           |
| <b>PA3152</b> | + |   | + | - | - | + | <i>hisH2</i> | <b>glutamine amidotransferase</b>                                                      |
| <b>PA3154</b> | + |   | + | - | - | + | <i>wzy</i>   | <b>B-band O-antigen polymerase</b>                                                     |
| <b>PA3155</b> |   |   | + | - | - |   | <i>wbpE</i>  | <b>UDP-2-acetamido-2-dideoxy-d-ribo-hex-3-uluronic acid transaminase, wbpE</b>         |
| <b>PA3156</b> |   |   | + |   |   |   | <i>wbpD</i>  | <b>UDP-2-acetamido-3-amino-2,3-dideoxy-d-glucuronic acid N-acetyltransferase, WbpD</b> |
| <b>PA3157</b> |   |   |   |   |   | + |              | <b>probable acetyltransferase</b>                                                      |
| <b>PA3159</b> |   |   | + |   |   |   | <i>wbpA</i>  | <b>UDP-N-acetyl-d-glucosamine 6-Dehydrogenase</b>                                      |
| <b>PA3160</b> |   |   | + |   |   | + | <i>wzz</i>   | <b>O-antigen chain length regulator</b>                                                |
| PA3161        |   | + |   | + | - |   | <i>himD</i>  | integration host factor beta subunit                                                   |
| PA3278        | - | + | + | - | + | + |              | hypothetical protein                                                                   |





|               |  |   |   |   |   |  |  |  |  |  |  |  |  |  |             |                                         |                                                  |
|---------------|--|---|---|---|---|--|--|--|--|--|--|--|--|--|-------------|-----------------------------------------|--------------------------------------------------|
| PA4922        |  |   |   |   |   |  |  |  |  |  |  |  |  |  | <i>azu</i>  | azurin precursor                        |                                                  |
| PA5027        |  | + |   |   |   |  |  |  |  |  |  |  |  |  |             | hypothetical protein                    |                                                  |
| PA5044        |  |   |   |   |   |  |  |  |  |  |  |  |  |  | <i>pilM</i> | type 4 fimbrial biogenesis protein PilM |                                                  |
| PA5086        |  |   |   |   |   |  |  |  |  |  |  |  |  |  |             | hypothetical protein                    |                                                  |
| PA5087        |  |   |   |   |   |  |  |  |  |  |  |  |  |  |             | hypothetical protein                    |                                                  |
| PA5105        |  |   | + |   |   |  |  |  |  |  |  |  |  |  | <i>hutC</i> | histidine utilization repressor HutC    |                                                  |
| PA5106        |  |   | + |   |   |  |  |  |  |  |  |  |  |  |             | conserved hypothetical protein          |                                                  |
| <b>PA5170</b> |  | + | + | + |   |  |  |  |  |  |  |  |  |  |             | <b><i>arcD</i></b>                      | <b>arginine/ornithine antiporter</b>             |
| <b>PA5171</b> |  | + | + |   |   |  |  |  |  |  |  |  |  |  |             | <b><i>arcA</i></b>                      | <b>arginine deiminase</b>                        |
| <b>PA5172</b> |  | + | + |   |   |  |  |  |  |  |  |  |  |  |             | <b><i>arcB</i></b>                      | <b>ornithine carbamoyltransferase, catabolic</b> |
| <b>PA5173</b> |  | + | + |   |   |  |  |  |  |  |  |  |  |  |             | <b><i>arcC</i></b>                      | <b>carbamate kinase</b>                          |
| PA5232        |  |   | + |   |   |  |  |  |  |  |  |  |  |  |             |                                         | conserved hypothetical protein                   |
| PA5427        |  |   | + |   |   |  |  |  |  |  |  |  |  |  | <i>adhA</i> | alcohol dehydrogenase                   |                                                  |
| PA5475        |  |   | + |   |   |  |  |  |  |  |  |  |  |  |             |                                         | hypothetical protein                             |
| PA5494        |  |   | + | + | - |  |  |  |  |  |  |  |  |  |             |                                         | hypothetical protein                             |

### Biofilm growth specific cluster

|        | bw/<br>/bf | tu/<br>bf | pl/<br>bf | bw/<br>lb | tu/<br>lb | pl/<br>lb | pl/<br>bw | pl/<br>tu | tu/<br>bw | bf/<br>lb |   |              |                                                           |
|--------|------------|-----------|-----------|-----------|-----------|-----------|-----------|-----------|-----------|-----------|---|--------------|-----------------------------------------------------------|
| PA0089 |            |           |           |           |           |           |           |           |           |           |   | <i>tssG1</i> | TssG1                                                     |
| PA0128 | -          | -         | -         |           |           |           |           |           |           |           | + |              | conserved hypothetical protein                            |
| PA0140 |            |           |           |           |           |           |           | -         |           |           | + | <i>ahpF</i>  | alkyl hydroperoxide reductase subunit F                   |
| PA0161 | -          | -         | -         |           |           |           |           |           |           |           | + |              | hypothetical protein                                      |
| PA0172 |            |           |           |           |           |           |           |           |           |           |   |              | hypothetical protein                                      |
| PA0257 |            | -         | -         |           |           |           |           |           |           |           |   |              | hypothetical protein                                      |
| PA0261 |            |           |           |           |           |           |           |           |           |           |   |              | hypothetical protein                                      |
| PA0263 | -          | -         | -         |           |           | +         |           | +         |           |           | + | <i>hcpC</i>  | secreted protein Hcp                                      |
| PA0291 | -          | -         | -         |           |           |           |           |           |           |           | + | <i>oprE</i>  | Anaerobically-induced outer membrane porin OprE precursor |
| PA0297 |            | -         |           |           |           | +         | +         | +         |           |           | + | <i>spuA</i>  | probable glutamine amidotransferase                       |
| PA0359 |            |           |           |           |           |           |           |           |           |           |   |              | hypothetical protein                                      |
| PA0363 | -          | -         | -         |           |           |           |           |           |           |           |   | <i>coaD</i>  | phosphopantetheine adenylyltransferase                    |
| PA0381 |            |           |           |           |           |           |           |           |           |           | + | <i>thiG</i>  | thiamine biosynthesis protein, thiazole moiety            |

|               |   |   |   |   |   |   |   |   |   |   |             |                                                  |                      |
|---------------|---|---|---|---|---|---|---|---|---|---|-------------|--------------------------------------------------|----------------------|
| PA0408        | - | - | - |   |   |   |   |   |   |   | <i>pilG</i> | twitching motility protein PilG                  |                      |
| PA0409        | - | - | - |   |   |   |   |   |   | + | <i>pilH</i> | twitching motility protein PilH                  |                      |
| PA0410        | - | - | - |   |   |   |   |   |   | + | <i>pilI</i> | twitching motility protein PilI                  |                      |
| PA0411        | - |   | - |   |   |   |   |   |   | + | <i>pilJ</i> | twitching motility protein PilJ                  |                      |
| PA0424        |   | - | - | + |   |   |   |   | - | + | <i>mexR</i> | multidrug resistance operon repressor MexR       |                      |
| PA0506        | - |   | - |   | + |   |   |   |   | + |             | probable acyl-CoA dehydrogenase                  |                      |
| PA0541        | - | - | - |   |   |   |   |   |   | + |             | hypothetical protein                             |                      |
| PA0563        | - | - |   |   |   | + | + | + |   | + |             | conserved hypothetical protein                   |                      |
| PA0576        | - | - | - |   |   |   |   |   | - | + | <i>rpoD</i> | sigma factor RpoD                                |                      |
| PA0578        | - | - | - | + |   | + |   | + | - | + |             | conserved hypothetical protein                   |                      |
| PA0579        | - | - |   | + |   | + |   | + | - | + | <i>rpsU</i> | 30S ribosomal protein S21                        |                      |
| PA0581        | - | - | - |   |   |   |   |   |   | + |             | conserved hypothetical protein                   |                      |
| PA0589        | - | - | - |   |   |   |   |   |   | + |             | conserved hypothetical protein                   |                      |
| PA0595        |   | - | - |   |   |   |   |   |   | + | <i>osta</i> | organic solvent tolerance protein OstA precursor |                      |
| <b>PA0652</b> |   |   | - | + |   |   |   |   |   | + | <i>vfr</i>  | <b>transcriptional regulator Vfr</b>             |                      |
| PA0654        | - | - | - |   |   |   |   |   |   | + | <i>speD</i> | S-adenosylmethionine decarboxylase proenzyme     |                      |
| PA0655        | - | - | - |   |   |   |   |   |   |   |             | hypothetical protein                             |                      |
| PA0667        | - | - | - |   |   |   |   |   |   |   |             | conserved hypothetical protein                   |                      |
| PA0767        | - | - | - |   |   |   |   |   |   | + | <i>lepA</i> | GTP-binding protein LepA                         |                      |
| PA0768        | - | - | - |   |   |   |   |   |   | + | <i>lepB</i> | signal peptidase I                               |                      |
| PA0805        | - | - |   |   |   | - | + | + | + | - | +           |                                                  | hypothetical protein |
| PA0915        | - | - | - |   |   |   |   |   |   | + |             | conserved hypothetical protein                   |                      |
| PA0916        |   | - | - |   |   |   |   |   |   | + |             | conserved hypothetical protein                   |                      |
| PA0944        |   | - | - |   |   |   |   |   |   | + | <i>purN</i> | phosphoribosylaminoimidazole synthetase          |                      |
| PA0945        | - | - | - |   |   |   |   |   |   | + | <i>purM</i> | phosphoribosylaminoimidazole synthetase          |                      |
| PA0955        | - | - | - |   |   |   |   |   |   | + |             | hypothetical protein                             |                      |
| PA0961        |   |   | - |   |   |   |   |   |   | + |             | probable cold-shock protein                      |                      |
| PA0965        | - | - |   |   |   |   | + |   |   |   | <i>ruvC</i> | Holliday junction resolvase RuvC                 |                      |
| PA0974        |   | - | - |   |   |   |   |   |   | + |             | conserved hypothetical protein                   |                      |
| PA0981        | - |   | - |   |   |   |   |   | - |   |             | hypothetical protein                             |                      |
| <b>PA0996</b> |   | - | - |   |   | - |   |   | + |   | <i>pqsA</i> | <b>probable coenzyme A ligase</b>                |                      |
| <b>PA0998</b> | - | - | - |   |   | - |   |   |   |   | <i>pqsC</i> | <b>PqsC</b>                                      |                      |
| PA1006        |   | - |   |   |   |   |   |   |   |   |             | conserved hypothetical protein                   |                      |





|        |   |   |   |   |   |   |   |             |                                           |                                                                    |
|--------|---|---|---|---|---|---|---|-------------|-------------------------------------------|--------------------------------------------------------------------|
| PA3013 |   |   |   | - | - |   | + | <i>foaB</i> | fatty-acid oxidation complex beta-subunit |                                                                    |
| PA3057 | - |   |   |   |   |   |   |             | hypothetical protein                      |                                                                    |
| PA3112 |   | - |   |   |   |   | - | +           | <i>accD</i>                               | acetyl-CoA carboxylase beta subunit                                |
| PA3162 |   | - |   |   |   | + | + | +           | <i>rpsA</i>                               | 30S ribosomal protein S1                                           |
| PA3217 | - | - | - |   |   |   |   | +           | <i>cyaB</i>                               | CyaB                                                               |
| PA3245 | - | - | - |   |   |   |   | +           | <i>minE</i>                               | cell division topological specificity factor MinE                  |
| PA3280 | - |   | - |   |   |   |   | +           | <i>oprO</i>                               | Pyrophosphate-specific outer membrane porin OprO precursor         |
| PA3292 | - | - | - |   |   |   | - | +           |                                           | hypothetical protein                                               |
| PA3299 | - |   | - |   |   |   |   | +           | <i>fadD1</i>                              | long-chain-fatty-acid--CoA ligase                                  |
| PA3332 | - | - | - |   |   |   |   | +           |                                           | conserved hypothetical protein                                     |
| PA3383 |   |   |   |   |   |   |   |             | <i>phnD</i>                               | binding protein component of ABC phosphonate transporter           |
| PA3480 |   | - |   |   |   |   |   | +           |                                           | probable deoxycytidine triphosphate deaminase                      |
| PA3489 | - | - | - |   |   |   |   | +           |                                           | conserved hypothetical protein                                     |
| PA3525 | - | - |   |   |   | + | + | +           | <i>argG</i>                               | argininosuccinate synthase                                         |
| PA3531 | - | - | - |   |   |   |   | +           | <i>bfrB</i>                               | bacterioferritin                                                   |
| PA3611 |   |   |   |   |   | + |   | +           |                                           | hypothetical protein                                               |
| PA3612 |   |   |   |   |   |   |   | +           |                                           | conserved hypothetical protein                                     |
| PA3621 | - | - |   |   |   | + | + | +           | <i>fdxA</i>                               | ferredoxin I                                                       |
| PA3633 |   |   |   |   |   |   |   | +           | <i>ygbP</i>                               | 4-diphosphocytidyl-2-C-methylerythritol synthase                   |
| PA3636 |   | - | - |   |   |   |   |             | <i>kdsA</i>                               | 2-dehydro-3-deoxyphosphooctonate aldolase                          |
| PA3639 |   |   |   |   |   |   |   | +           | <i>accA</i>                               | acetyl-coenzyme A carboxylase carboxyl transferase (alpha subunit) |
| PA3642 |   |   |   |   |   |   |   | +           | <i>rnhB</i>                               | ribonuclease HII                                                   |
| PA3644 |   |   |   |   |   |   |   | +           | <i>lpxA</i>                               | UDP-N-acetylglucosamine acyltransferase                            |
| PA3645 | - | - | - |   |   |   |   | +           | <i>fabZ</i>                               | (3R)-hydroxymyristoyl-[acyl carrier protein] dehydratase           |
| PA3646 | - | - | - |   |   |   |   | +           | <i>lpxD</i>                               | UDP-3-O-[3-hydroxylauroyl] glucosamine N-acyltransferase           |
| PA3648 | - | - | - |   |   |   |   | +           | <i>opr86</i>                              | outer membrane protein Opr86                                       |
| PA3653 | - |   | - |   |   |   |   |             | <i>frr</i>                                | ribosome recycling factor                                          |
| PA3654 | - | - |   |   |   |   |   | +           | <i>pyrH</i>                               | uridylate kinase                                                   |
| PA3655 |   | - |   |   |   | + |   | +           | <i>tsf</i>                                | elongation factor Ts                                               |
| PA3656 |   | - |   |   |   |   |   | +           | <i>rpsB</i>                               | 30S ribosomal protein S2                                           |
| PA3686 |   | - | - |   |   |   |   | +           | <i>adk</i>                                | adenylate kinase                                                   |
| PA3700 |   |   |   |   |   |   |   | +           | <i>lysS</i>                               | lysyl-tRNA synthetase                                              |
| PA3722 | - | - | - |   |   |   |   | +           |                                           | hypothetical protein                                               |

|        |   |   |   |   |  |   |   |   |   |   |             |                                                        |
|--------|---|---|---|---|--|---|---|---|---|---|-------------|--------------------------------------------------------|
| PA3741 | - | - | - |   |  |   |   |   |   | + |             | hypothetical protein                                   |
| PA3742 | - | - | - | + |  |   | - |   |   | + | <i>rplS</i> | 50S ribosomal protein L19                              |
| PA3743 |   | - |   | + |  | + |   |   |   | + | <i>trmD</i> | tRNA (guanine-N1)-methyltransferase                    |
| PA3745 |   | - |   | + |  | + |   |   |   | + | <i>rpsP</i> | 30S ribosomal protein S16                              |
| PA3770 |   | - | - |   |  |   |   |   |   | + | <i>guaB</i> | inosine-5'-monophosphate dehydrogenase                 |
| PA3804 | - | - | - |   |  |   |   |   |   | + |             | hypothetical protein                                   |
| PA3805 | - | - |   |   |  |   |   |   |   |   | <i>pilF</i> | type 4 fimbrial biogenesis protein PilF                |
| PA3806 | - | - | - |   |  |   | - |   |   | + |             | conserved hypothetical protein                         |
| PA3818 |   | - |   | + |  | + |   |   |   | + | <i>suhB</i> | extragenic suppressor protein SuhB                     |
| PA3822 |   | - |   |   |  |   |   |   |   | + |             | conserved hypothetical protein                         |
| PA3824 | - | - | - |   |  |   |   |   |   | + | <i>queA</i> | S-adenosylmethionine:trna ribosyltransferase-isomerase |
| PA3903 |   | - |   |   |  |   |   |   |   | + | <i>prfC</i> | peptide chain release factor 3                         |
| PA3905 | - | - | - |   |  |   |   |   |   | + |             | hypothetical protein                                   |
| PA3906 | - | - | - |   |  |   |   |   |   | + |             | hypothetical protein                                   |
| PA3907 |   | - |   |   |  |   |   |   |   | + |             | hypothetical protein                                   |
| PA3908 | - | - | - |   |  |   |   |   |   | + |             | hypothetical protein                                   |
| PA3941 | - | - |   |   |  |   |   |   |   | + |             | hypothetical protein                                   |
| PA3966 | - | - | - | + |  |   |   |   |   | + |             | hypothetical protein                                   |
| PA3967 | - | - | - |   |  |   |   |   |   | + |             | hypothetical protein                                   |
| PA3979 | - | - |   | + |  | + |   |   |   | + |             | hypothetical protein                                   |
| PA3980 |   | - |   |   |  |   |   |   |   | + |             | conserved hypothetical protein                         |
| PA3982 |   | - |   | + |  |   |   |   |   | + |             | conserved hypothetical protein                         |
| PA3989 |   | - |   |   |  |   |   |   |   |   | <i>holA</i> | DNA polymerase III, delta subunit                      |
| PA4031 |   | - | - | + |  |   |   |   |   | + | <i>ppa</i>  | inorganic pyrophosphatase                              |
| PA4130 | - | - | - |   |  |   |   |   |   |   |             | probable sulfite or nitrite reductase                  |
| PA4131 | - |   | - |   |  |   | - |   |   | + |             | probable iron-sulfur protein                           |
| PA4132 | - | - | - |   |  |   | - |   |   | + |             | conserved hypothetical protein                         |
| PA4133 | - | - | - |   |  | - | - | + |   |   |             | cytochrome c oxidase subunit (cbb3-type)               |
| PA4134 | - | - | - |   |  | - |   |   |   | + |             | hypothetical protein                                   |
| PA4139 | - | - | - |   |  | - | - | - | - | + |             | hypothetical protein                                   |
| PA4140 | - | - | - |   |  |   |   |   |   | + |             | hypothetical protein                                   |
| PA4142 | - | - | - |   |  |   |   |   |   | + |             | probable secretion protein                             |
| PA4237 |   | - | - |   |  |   | - |   |   | + | <i>rplQ</i> | 50S ribosomal protein L17                              |



|        |   |   |   |   |   |   |   |   |   |             |                                                   |                                                  |
|--------|---|---|---|---|---|---|---|---|---|-------------|---------------------------------------------------|--------------------------------------------------|
| PA4426 | - | - | - |   | - | - |   |   | + |             | conserved hypothetical protein                    |                                                  |
| PA4427 | - | - | - |   | - | + |   |   | + | <i>sspB</i> | stringent starvation protein B                    |                                                  |
| PA4428 | - | - | - |   |   |   |   |   | + | <i>sspA</i> | stringent starvation protein A                    |                                                  |
| PA4429 | - | - | - |   |   |   |   |   | + |             | probable cytochrome c1 precursor                  |                                                  |
| PA4430 | - | - | - |   |   |   |   |   | + |             | probable cytochrome b                             |                                                  |
| PA4431 | - | - | - |   |   |   |   |   | + |             | probable iron-sulfur protein                      |                                                  |
| PA4432 | - | - | - | + | + |   | + | - | + | <i>rpsI</i> | 30S ribosomal protein S9                          |                                                  |
| PA4433 | - | - | - | + | + |   |   |   | + | <i>rplM</i> | 50S ribosomal protein L13                         |                                                  |
| PA4449 |   | - |   |   |   |   |   |   | + | <i>hisG</i> | ATP-phosphoribosyltransferase                     |                                                  |
| PA4451 |   |   |   |   | + |   | + |   |   |             | conserved hypothetical protein                    |                                                  |
| PA4458 | - | - | - |   |   |   |   |   | + |             | conserved hypothetical protein                    |                                                  |
| PA4459 | - | - | - |   |   |   |   |   | + |             | conserved hypothetical protein                    |                                                  |
| PA4460 |   | - |   |   |   |   |   |   |   |             | conserved hypothetical protein                    |                                                  |
| PA4461 |   | - |   | + |   |   |   | + | - | +           | probable ATP-binding component of ABC transporter |                                                  |
| PA4465 |   |   |   |   |   |   |   |   |   | +           | conserved hypothetical protein                    |                                                  |
| PA4466 |   | - |   |   |   |   |   |   |   | +           | probable phosphoryl carrier protein               |                                                  |
| PA4479 |   |   |   | + | + | + |   |   |   | +           | <i>mreD</i>                                       | rod shape-determining protein MreD               |
| PA4480 | - | - | - |   |   |   |   |   |   | +           | <i>mreC</i>                                       | rod shape-determining protein MreC               |
| PA4482 |   |   |   |   |   |   |   |   |   | +           | <i>gatC</i>                                       | Glu-tRNA(Gln) amidotransferase subunit C         |
| PA4494 | - | - | - |   |   |   |   |   |   | +           | <i>roxS</i>                                       | RoxS                                             |
| PA4528 | - | - | - |   |   |   |   |   |   | +           | <i>pilD</i>                                       | type 4 prepilin peptidase PilD                   |
| PA4530 | - |   |   |   |   |   |   |   |   | +           |                                                   | conserved hypothetical protein                   |
| PA4554 |   |   |   |   |   |   |   |   |   | +           | <i>pilY1</i>                                      | type 4 fimbrial biogenesis protein PilY1         |
| PA4563 | - | - | - | + | + | + |   | - | + |             | <i>rpsT</i>                                       | 30S ribosomal protein S20                        |
| PA4568 | - | - |   | + |   |   | + |   | + |             | <i>rplU</i>                                       | 50S ribosomal protein L21                        |
| PA4569 | - | - | - |   |   |   |   |   |   | +           | <i>ispB</i>                                       | octaprenyl-diphosphate synthase                  |
| PA4574 |   |   |   |   |   |   |   |   |   | +           |                                                   | conserved hypothetical protein                   |
| PA4625 | - | - | - |   |   |   |   |   |   | +           | <i>cdrA</i>                                       | cyclic diguanylate-regulated TPS partner A, CdrA |
| PA4640 |   |   |   |   |   |   |   |   |   | +           | <i>mgoB</i>                                       | malate:quinone oxidoreductase                    |
| PA4670 | - | - | - | + | + |   |   | - | + |             | <i>prs</i>                                        | ribose-phosphate pyrophosphokinase               |
| PA4671 |   |   |   | + |   |   | + |   | + |             |                                                   | probable ribosomal protein L25                   |
| PA4672 | - | - | - |   |   |   |   |   |   | +           | <i>pth</i>                                        | peptidyl-tRNA hydrolase                          |
| PA4673 | - | - |   | + | + |   |   |   |   | +           |                                                   | conserved hypothetical protein                   |



|        |   |   |   |   |   |   |   |   |              |                                                                     |
|--------|---|---|---|---|---|---|---|---|--------------|---------------------------------------------------------------------|
| PA4678 | - | - | - |   |   |   |   |   | <i>rimI</i>  | peptide n-acetyltransferase RimI                                    |
| PA4728 |   | - |   |   |   |   |   | + | <i>folK</i>  | 2-amino-4-hydroxy-6-hydroxymethyldihydropteridine pyrophosphokinase |
| PA4740 |   |   |   | + |   |   |   | + | <i>pnp</i>   | polyribonucleotide nucleotidyltransferase                           |
| PA4743 | - | - | - |   |   |   |   | + | <i>rbfA</i>  | ribosome-binding factor A                                           |
| PA4744 |   |   |   |   |   |   |   | + | <i>infB</i>  | translation initiation factor IF-2                                  |
| PA4745 |   |   |   |   |   |   |   | + | <i>nusA</i>  | N utilization substance protein A                                   |
| PA4746 | - | - | - | + |   | + | - | + |              | conserved hypothetical protein                                      |
| PA4747 | - | - |   | + | + | + |   | + | <i>secG</i>  | secretion protein SecG                                              |
| PA4753 | - | - |   | + | + | + |   | + |              | conserved hypothetical protein                                      |
| PA4757 | - | - |   | + |   | + |   | + |              | conserved hypothetical protein                                      |
| PA4765 | - | - | - |   |   | + | - | + | <i>omlA</i>  | Outer membrane lipoprotein OmlA precursor                           |
| PA4768 | - | - | - |   |   |   |   |   | <i>smpB</i>  | SmpB protein                                                        |
| PA4846 | - | - |   | + |   | + |   | + | <i>aroQI</i> | 3-dehydroquininate dehydratase                                      |
| PA4853 | - | - | - |   |   | + | - | + | <i>fis</i>   | DNA-binding protein Fis                                             |
| PA4932 |   | - |   | + |   | + | - | + | <i>rplI</i>  | 50S ribosomal protein L9                                            |
| PA4934 | - | - |   | + | + | + |   | + | <i>rpsR</i>  | 30S ribosomal protein S18                                           |
| PA4935 | - | - | - | + |   |   |   | + | <i>rpsF</i>  | 30S ribosomal protein S6                                            |
| PA4962 | - | - | - |   |   |   |   | + |              | conserved hypothetical protein                                      |
| PA4965 |   |   | - |   |   |   |   |   |              | hypothetical protein                                                |
| PA4997 |   |   |   | + |   |   |   |   | <i>msbA</i>  | transport protein MsbA                                              |
| PA5033 | - | - | - |   |   |   |   | + |              | hypothetical protein                                                |
| PA5043 |   |   | - |   |   | - |   |   | <i>pilN</i>  | type 4 fimbrial biogenesis protein PilN                             |
| PA5045 | - | - | - |   |   |   |   | + | <i>ponA</i>  | penicillin-binding protein 1A                                       |
| PA5046 |   |   |   |   |   |   |   |   |              | malic enzyme                                                        |
| PA5049 | - | - |   | + | + | + |   | + | <i>rpmE</i>  | 50S ribosomal protein L31                                           |
| PA5117 | - | - |   | + |   |   |   | + | <i>typA</i>  | regulatory protein TypA                                             |
| PA5118 | - | - |   |   |   |   |   | + | <i>thiI</i>  | thiazole biosynthesis protein ThiI                                  |
| PA5130 |   |   | - |   |   |   |   | + |              | conserved hypothetical protein                                      |
| PA5139 | - | - | - |   |   |   |   | + |              | hypothetical protein                                                |
| PA5203 |   |   |   |   |   |   |   | + | <i>gshA</i>  | glutamate--cysteine ligase                                          |
| PA5239 | - | - |   | + |   | + | - | + | <i>rho</i>   | transcription termination factor Rho                                |
| PA5244 |   |   |   | + |   |   |   |   |              | conserved hypothetical protein                                      |
| PA5296 | - |   |   |   |   |   |   | + | <i>rep</i>   | ATP-dependent DNA helicase Rep                                      |

|        |   |   |   |  |  |  |  |  |  |  |  |  |  |  |  |  |  |  |  |  |             |               |                                                                        |  |
|--------|---|---|---|--|--|--|--|--|--|--|--|--|--|--|--|--|--|--|--|--|-------------|---------------|------------------------------------------------------------------------|--|
| PA5300 | - | - |   |  |  |  |  |  |  |  |  |  |  |  |  |  |  |  |  |  | <i>cycB</i> | cytochrome c5 |                                                                        |  |
| PA5302 |   |   | - |  |  |  |  |  |  |  |  |  |  |  |  |  |  |  |  |  |             | <i>dadX</i>   | catabolic alanine racemase                                             |  |
| PA5315 | - | - |   |  |  |  |  |  |  |  |  |  |  |  |  |  |  |  |  |  |             | <i>rpmG</i>   | 50S ribosomal protein L33                                              |  |
| PA5316 | - | - |   |  |  |  |  |  |  |  |  |  |  |  |  |  |  |  |  |  |             | <i>rpmB</i>   | 50S ribosomal protein L28                                              |  |
| PA5338 |   |   |   |  |  |  |  |  |  |  |  |  |  |  |  |  |  |  |  |  |             | <i>spoT</i>   | guanosine-3',5'-bis(diphosphate) 3'-pyrophosphohydrolase               |  |
| PA5351 | - |   |   |  |  |  |  |  |  |  |  |  |  |  |  |  |  |  |  |  |             | <i>rubA1</i>  | Rubredoxin 1                                                           |  |
| PA5366 | - | - | - |  |  |  |  |  |  |  |  |  |  |  |  |  |  |  |  |  |             | <i>pstB</i>   | ATP-binding component of ABC phosphate transporter                     |  |
| PA5367 | - | - | - |  |  |  |  |  |  |  |  |  |  |  |  |  |  |  |  |  |             | <i>pstA</i>   | membrane protein component of ABC phosphate transporter                |  |
| PA5369 | - |   |   |  |  |  |  |  |  |  |  |  |  |  |  |  |  |  |  |  |             | <i>pstS</i>   | phosphate ABC transporter, periplasmic phosphate-binding protein, PstS |  |
| PA5435 |   | - | - |  |  |  |  |  |  |  |  |  |  |  |  |  |  |  |  |  |             |               |                                                                        |  |
| PA5462 |   |   |   |  |  |  |  |  |  |  |  |  |  |  |  |  |  |  |  |  |             |               |                                                                        |  |
| PA5479 | - | - | - |  |  |  |  |  |  |  |  |  |  |  |  |  |  |  |  |  |             | <i>gltP</i>   | proton-glutamate symporter                                             |  |
| PA5490 | - | - | - |  |  |  |  |  |  |  |  |  |  |  |  |  |  |  |  |  |             | <i>cc4</i>    | cytochrome c4 precursor                                                |  |
| PA5491 | - | - |   |  |  |  |  |  |  |  |  |  |  |  |  |  |  |  |  |  |             |               |                                                                        |  |
| PA5492 | - |   |   |  |  |  |  |  |  |  |  |  |  |  |  |  |  |  |  |  |             |               |                                                                        |  |
| PA5505 | - | - | - |  |  |  |  |  |  |  |  |  |  |  |  |  |  |  |  |  |             |               |                                                                        |  |
| PA5554 |   |   |   |  |  |  |  |  |  |  |  |  |  |  |  |  |  |  |  |  |             | <i>atpD</i>   | ATP synthase beta chain                                                |  |
| PA5555 | - |   |   |  |  |  |  |  |  |  |  |  |  |  |  |  |  |  |  |  |             | <i>atpG</i>   | ATP synthase gamma chain                                               |  |
| PA5556 |   |   |   |  |  |  |  |  |  |  |  |  |  |  |  |  |  |  |  |  |             | <i>atpA</i>   | ATP synthase alpha chain                                               |  |
| PA5557 |   |   |   |  |  |  |  |  |  |  |  |  |  |  |  |  |  |  |  |  |             | <i>atpH</i>   | ATP synthase delta chain                                               |  |
| PA5560 | - | - | - |  |  |  |  |  |  |  |  |  |  |  |  |  |  |  |  |  |             | <i>atpB</i>   | ATP synthase A chain                                                   |  |
| PA5561 |   |   |   |  |  |  |  |  |  |  |  |  |  |  |  |  |  |  |  |  |             | <i>atpI</i>   | ATP synthase protein I                                                 |  |
| PA5563 |   |   |   |  |  |  |  |  |  |  |  |  |  |  |  |  |  |  |  |  |             | <i>soj</i>    | chromosome partitioning protein Soj                                    |  |
| PA5568 | - | - | - |  |  |  |  |  |  |  |  |  |  |  |  |  |  |  |  |  |             |               |                                                                        |  |
| PA5569 |   |   |   |  |  |  |  |  |  |  |  |  |  |  |  |  |  |  |  |  |             | <i>rnpA</i>   | ribonuclease P protein component                                       |  |
| PA5570 |   |   |   |  |  |  |  |  |  |  |  |  |  |  |  |  |  |  |  |  |             | <i>rpmH</i>   | 50S ribosomal protein L34                                              |  |

### Planktonic growth specific cluster

|        | bw<br>/bf | tu/<br>bf | pl/<br>bf | bw/<br>lb | tu/<br>lb | pl/<br>lb | pl/<br>bw | pl/<br>tu | tu/<br>bw | bf/<br>lb |                      |
|--------|-----------|-----------|-----------|-----------|-----------|-----------|-----------|-----------|-----------|-----------|----------------------|
| PA0038 | +         |           |           |           |           |           |           |           |           |           | hypothetical protein |
| PA0039 |           |           |           |           |           |           |           |           |           |           | hypothetical protein |

|        |   |   |   |   |   |   |   |   |              |  |                                                                          |
|--------|---|---|---|---|---|---|---|---|--------------|--|--------------------------------------------------------------------------|
| PA0052 |   | + | - | - |   | + | + | - |              |  | hypothetical protein                                                     |
| PA0105 |   | + | - | - | - | + | + | - | <i>coxB</i>  |  | cytochrome c oxidase, subunit II                                         |
| PA0106 |   |   | - | - | - | + | + | - | <i>coxA</i>  |  | cytochrome c oxidase, subunit I                                          |
| PA0107 |   | + | - | - | - | + | + | - |              |  | conserved hypothetical protein                                           |
| PA0108 | - |   | - | - | - | + | + | - | <i>coIII</i> |  | cytochrome c oxidase, subunit III                                        |
| PA0109 |   | + | - |   |   | + | + | - |              |  | hypothetical protein                                                     |
| PA0110 |   |   | - | - | - | + | + | - |              |  | hypothetical protein                                                     |
| PA0111 |   |   | - | - | - |   |   | - |              |  | hypothetical protein                                                     |
| PA0112 |   |   | - | - | - |   |   | - |              |  | hypothetical protein                                                     |
| PA0113 |   |   | - | - | - |   |   | - |              |  | probable cytochrome c oxidase assembly factor                            |
| PA0122 | - | - | - | - | - | + | + | - |              |  | conserved hypothetical protein                                           |
| PA0156 |   |   |   |   | - |   |   | - | <i>triA</i>  |  | (RND) triclosan efflux membrane fusion protein, TriA                     |
| PA0157 |   |   |   |   | - |   |   | - | <i>triB</i>  |  | (RND) triclosan efflux membrane fusion protein, TriB                     |
| PA0173 |   |   | - |   | - |   |   | - |              |  | probable methylesterase                                                  |
| PA0175 |   |   | - | - | - |   |   | - | <i>cheR2</i> |  | probable chemotaxis protein methyltransferase                            |
| PA0176 |   |   | - | - | - |   |   | - | <i>aer2</i>  |  | aerotaxis transducer Aer2                                                |
| PA0177 |   |   | - | - | - |   |   | - |              |  | probable purine-binding chemotaxis protein                               |
| PA0178 |   |   | - | - | - |   |   | - |              |  | probable two-component sensor                                            |
| PA0179 | - | + | - | - | - | + | + | - |              |  | probable two-component response regulator                                |
| PA0180 |   |   | - | - | - |   |   | - | <i>cttP</i>  |  | chemotactic transducer for trichloroethylene [positive chemotaxis], CttP |
| PA0200 |   | + | + |   |   | + |   | + |              |  | hypothetical protein                                                     |
| PA0249 |   |   | - | - | - |   |   | - |              |  | probable acetyltransferase                                               |
| PA0250 |   |   | + |   |   |   |   | - |              |  | conserved hypothetical protein                                           |
| PA0256 |   |   | - | - | - |   |   | - |              |  | hypothetical protein                                                     |
| PA0312 |   | + | + | - | - | + |   | - |              |  | conserved hypothetical protein                                           |
| PA0329 |   |   | - | - | - |   |   | - |              |  | conserved hypothetical protein                                           |
| PA0332 |   | + | + | - |   |   |   | - |              |  | hypothetical protein                                                     |
| PA0365 |   |   | - | - | - |   |   | - |              |  | hypothetical protein                                                     |
| PA0366 |   |   |   |   | - |   |   | - |              |  | probable aldehyde dehydrogenase                                          |
| PA0384 |   |   | - | - |   |   |   | - |              |  | hypothetical protein                                                     |
| PA0387 |   |   |   |   |   |   |   | - |              |  | conserved hypothetical protein                                           |
| PA0388 |   | + |   |   |   | - | + | - |              |  | hypothetical protein                                                     |
| PA0432 |   | - | - |   | - |   |   |   | <i>sahH</i>  |  | S-adenosyl-L-homocysteine hydrolase                                      |

|               |   |   |   |   |   |   |  |   |   |                                              |
|---------------|---|---|---|---|---|---|--|---|---|----------------------------------------------|
| PA0452        |   | + |   |   |   | + |  |   |   | probable stomatin-like protein               |
| PA0459        |   |   |   |   |   | - |  |   |   | probable ClpA/B protease ATP binding subunit |
| PA0484        |   |   | + | - | - |   |  | + |   | conserved hypothetical protein               |
| PA0520        |   | + | + | - |   |   |  |   | + | regulatory protein NirQ                      |
| PA0540        |   |   |   |   |   |   |  |   |   | hypothetical protein                         |
| PA0586        |   |   |   | - | - |   |  |   |   | conserved hypothetical protein               |
| PA0588        | + |   |   |   |   |   |  |   |   | conserved hypothetical protein               |
| PA0612        |   |   |   | - |   |   |  |   | - | repressor, PtrB                              |
| PA0614        |   |   | + |   |   |   |  |   | - | hypothetical protein                         |
| PA0616        |   |   |   |   |   |   |  |   | - | hypothetical protein                         |
| PA0619        |   |   |   |   |   |   |  |   |   | probable bacteriophage protein               |
| PA0624        |   |   |   | - | - |   |  |   |   | hypothetical protein                         |
| PA0631        |   |   |   |   |   |   |  |   | - | hypothetical protein                         |
| PA0635        |   |   |   |   |   |   |  |   |   | hypothetical protein                         |
| PA0636        |   |   |   |   |   |   |  |   |   | hypothetical protein                         |
| PA0648        |   |   |   |   |   |   |  |   |   | hypothetical protein                         |
| PA0656        |   |   | + | - |   |   |  |   | + | probable HIT family protein                  |
| PA0745        |   |   |   | - | - |   |  |   |   | probable enoyl-CoA hydratase/isomerase       |
| PA0746        |   |   |   |   |   |   |  |   |   | probable acyl-CoA dehydrogenase              |
| PA0762        |   |   |   |   |   |   |  |   |   | sigma factor AlgU                            |
| PA0776        |   |   |   |   |   |   |  |   |   | hypothetical protein                         |
| PA0865        |   |   |   | - | - |   |  |   | + | 4-hydroxyphenylpyruvate dioxygenase          |
| PA0866        |   |   |   | - | - |   |  |   |   | aromatic amino acid transport protein AroP2  |
| PA0870        |   |   |   | - | - |   |  |   |   | aromatic amino acid aminotransferase         |
| PA0871        |   |   |   | - | - |   |  |   |   | pterin-4-alpha-carbinolamine dehydratase     |
| PA0872        |   |   |   |   |   |   |  |   |   | phenylalanine-4-hydroxylase                  |
| PA0887        |   |   |   |   |   |   |  |   |   | acetyl-coenzyme A synthetase                 |
| PA0921        |   |   |   | - | - |   |  |   |   | hypothetical protein                         |
| PA0959        |   |   |   | - | - |   |  |   |   | hypothetical protein                         |
| PA0960        |   |   |   | - | - |   |  |   |   | hypothetical protein                         |
| <b>PA1002</b> |   |   |   | - | - |   |  |   | + | <b>anthranilate synthase component II</b>    |
| PA1027        |   |   |   |   |   |   |  |   |   | probable aldehyde dehydrogenase              |
| PA1041        |   |   |   | + | - | - |  |   | + | probable outer membrane protein precursor    |

|        |   |   |   |   |   |  |  |  |   |                                                                                           |
|--------|---|---|---|---|---|--|--|--|---|-------------------------------------------------------------------------------------------|
| PA1042 |   | - |   |   |   |  |  |  |   | conserved hypothetical protein                                                            |
| PA1048 |   | - | - | - |   |  |  |  |   | probable outer membrane protein precursor                                                 |
| PA1053 |   |   |   |   |   |  |  |  |   | conserved hypothetical protein                                                            |
| PA1084 |   |   |   |   |   |  |  |  | + | <i>flgI</i> flagellar P-ring protein precursor FlgI                                       |
| PA1121 |   |   | - | - | - |  |  |  |   | <i>yfiR</i> YfiR                                                                          |
| PA1172 |   |   | - |   |   |  |  |  |   | <i>napC</i> cytochrome c-type protein NapC                                                |
| PA1173 |   |   | - |   |   |  |  |  | + | <i>napB</i> cytochrome c-type protein NapB precursor                                      |
| PA1174 |   |   | - | - | - |  |  |  | + | <i>napA</i> periplasmic nitrate reductase protein NapA                                    |
| PA1175 | - |   | - | - | - |  |  |  | + | <i>napD</i> NapD protein of periplasmic nitrate reductase                                 |
| PA1176 |   | + | - | - | - |  |  |  | + | <i>napF</i> ferredoxin protein NapF                                                       |
| PA1177 |   | + | + | - | - |  |  |  | + | <i>napE</i> periplasmic nitrate reductase protein NapE                                    |
| PA1178 |   |   | - | - | - |  |  |  | - | <i>oprH</i> PhoP/Q and low Mg <sup>2+</sup> inducible outer membrane protein H1 precursor |
| PA1179 |   |   | - | - | - |  |  |  |   | <i>phoP</i> two-component response regulator PhoP                                         |
| PA1180 |   |   | - | - | - |  |  |  |   | <i>phoQ</i> two-component sensor PhoQ                                                     |
| PA1202 |   |   | - |   |   |  |  |  |   | probable hydrolase                                                                        |
| PA1246 |   |   |   |   |   |  |  |  |   | <i>aprD</i> alkaline protease secretion protein AprD                                      |
| PA1247 |   |   |   |   |   |  |  |  |   | <i>aprE</i> alkaline protease secretion protein AprE                                      |
| PA1249 |   |   |   |   |   |  |  |  |   | <i>aprA</i> alkaline metalloproteinase precursor                                          |
| PA1283 |   |   | - |   |   |  |  |  |   | probable transcriptional regulator                                                        |
| PA1287 |   | + |   |   |   |  |  |  |   | probable glutathione peroxidase                                                           |
| PA1289 |   |   | - | - | - |  |  |  |   | hypothetical protein                                                                      |
| PA1301 | + |   |   |   |   |  |  |  |   | probable transmembrane sensor                                                             |
| PA1327 |   |   | - |   |   |  |  |  |   | probable protease                                                                         |
| PA1342 |   |   | - | - | - |  |  |  |   | probable binding protein component of ABC transporter                                     |
| PA1348 |   |   | - | - | - |  |  |  |   | hypothetical protein                                                                      |
| PA1353 |   |   | - |   |   |  |  |  |   | hypothetical protein                                                                      |
| PA1430 |   |   |   |   |   |  |  |  |   | <b><i>lasR</i> transcriptional regulator LasR</b>                                         |
| PA1431 |   | - | - | - |   |  |  |  | + | <b><i>rsaL</i> regulatory protein RsaL</b>                                                |
| PA1432 |   | + |   |   |   |  |  |  | + | <b><i>lasI</i> autoinducer synthesis protein LasI</b>                                     |
| PA1454 |   |   | - |   |   |  |  |  | + | <i>fleN</i> flagellar synthesis regulator FleN                                            |
| PA1455 |   |   | - | - |   |  |  |  |   | <i>fliA</i> sigma factor FliA                                                             |
| PA1456 |   |   | - | - |   |  |  |  |   | <i>cheY</i> two-component response regulator CheY                                         |
| PA1458 |   |   | - | - |   |  |  |  |   | <i>cheA</i> probable two-component sensor                                                 |



|               |   |   |   |   |   |   |                                                                                |                                                         |
|---------------|---|---|---|---|---|---|--------------------------------------------------------------------------------|---------------------------------------------------------|
| PA2174        | + | + | - |   | + | - | hypothetical protein                                                           |                                                         |
| PA2237        |   |   |   |   |   | - | <i>pslG</i> PslG                                                               |                                                         |
| PA2247        |   |   | - | - | - | - | <i>bkdA1</i> 2-oxoisovalerate dehydrogenase (alpha subunit)                    |                                                         |
| PA2248        |   |   | - | - | - | - | <i>bkdA2</i> 2-oxoisovalerate dehydrogenase (beta subunit)                     |                                                         |
| PA2249        |   | + | - | - | - | - | <i>bkdB</i> branched-chain alpha-keto acid dehydrogenase (lipoamide component) |                                                         |
| PA2250        |   |   | - | - | - | - | <i>lpdV</i> lipoamide dehydrogenase-Val                                        |                                                         |
| PA2364        |   | + | - | - | + | - | hypothetical protein                                                           |                                                         |
| PA2365        | - | - | - | - |   | + | conserved hypothetical protein                                                 |                                                         |
| PA2367        |   |   | - |   |   |   | hypothetical protein                                                           |                                                         |
| PA2375        |   | + | - |   | + | + | hypothetical protein                                                           |                                                         |
| PA2381        |   | - | - | - | - | - | hypothetical protein                                                           |                                                         |
| PA2422        |   |   | - |   |   | - | hypothetical protein                                                           |                                                         |
| PA2423        |   |   | - |   |   |   | hypothetical protein                                                           |                                                         |
| PA2433        | + | + | - | - | - | - | hypothetical protein                                                           |                                                         |
| PA2434        |   |   |   |   |   |   | hypothetical protein                                                           |                                                         |
| PA2501        | - |   | - | - | - | + | +                                                                              | hypothetical protein                                    |
| PA2504        |   |   | - | - | - |   |                                                                                | hypothetical protein                                    |
| PA2511        |   | + |   |   |   | + | +                                                                              | probable transcriptional regulator                      |
| PA2562        |   | + | - | - | - |   |                                                                                | hypothetical protein                                    |
| PA2564        |   |   | - | - | - | + |                                                                                | hypothetical protein                                    |
| PA2565        |   | + | - | - | - | + | +                                                                              | hypothetical protein                                    |
| PA2566        |   |   | - | - | - |   |                                                                                | conserved hypothetical protein                          |
| PA2571        |   |   | - | - | - |   |                                                                                | probable two-component sensor                           |
| PA2573        |   | + | + | - |   | + |                                                                                | probable chemotaxis transducer                          |
| PA2577        |   |   |   |   |   | - |                                                                                | probable transcriptional regulator                      |
| <b>PA2587</b> |   |   |   |   |   | - |                                                                                | <b><i>pqsH</i> probable FAD-dependent monooxygenase</b> |
| PA2591        | - | - | - | - |   | + | +                                                                              | probable transcriptional regulator                      |
| PA2605        |   | + | - |   |   | + |                                                                                | conserved hypothetical protein                          |
| PA2607        |   | + |   |   |   |   |                                                                                | conserved hypothetical protein                          |
| PA2618        |   |   | - | - |   |   | +                                                                              | hypothetical protein                                    |
| PA2620        |   | + | - |   |   |   |                                                                                | <i>clpA</i> ATP-binding protease component ClpA         |
| PA2622        | - | + | - | - |   | + | +                                                                              | <i>cspD</i> cold-shock protein CspD                     |
| PA2640        | - | - | - | - | - |   |                                                                                | <i>nuoE</i> NADH dehydrogenase I chain E                |

|        |   |   |   |   |   |   |   |   |   |  |  |  |  |  |  |  |  |  |  |             |                                        |                                                          |
|--------|---|---|---|---|---|---|---|---|---|--|--|--|--|--|--|--|--|--|--|-------------|----------------------------------------|----------------------------------------------------------|
| PA2643 | - | - |   | - | - |   | + |   |   |  |  |  |  |  |  |  |  |  |  | <i>nuoH</i> | NADH dehydrogenase I chain H           |                                                          |
| PA2645 |   |   |   | - |   |   | - |   |   |  |  |  |  |  |  |  |  |  |  | <i>nuoJ</i> | NADH dehydrogenase I chain J           |                                                          |
| PA2646 | - |   |   | - | - |   | - |   |   |  |  |  |  |  |  |  |  |  |  | <i>nuoK</i> | NADH dehydrogenase I chain K           |                                                          |
| PA2747 |   |   |   | + | - | - |   |   |   |  |  |  |  |  |  |  |  |  |  |             | hypothetical protein                   |                                                          |
| PA2754 | + | + |   |   |   |   | - | - | - |  |  |  |  |  |  |  |  |  |  |             | conserved hypothetical protein         |                                                          |
| PA2762 |   |   |   |   | - | - | - |   |   |  |  |  |  |  |  |  |  |  |  |             | hypothetical protein                   |                                                          |
| PA2771 |   |   |   |   | - | - | - |   |   |  |  |  |  |  |  |  |  |  |  |             | conserved hypothetical protein         |                                                          |
| PA2779 |   |   |   | + | - |   |   |   |   |  |  |  |  |  |  |  |  |  |  |             | hypothetical protein                   |                                                          |
| PA2799 |   |   |   | + |   |   |   |   |   |  |  |  |  |  |  |  |  |  |  |             | hypothetical protein                   |                                                          |
| PA2827 |   |   |   | + | + |   |   |   |   |  |  |  |  |  |  |  |  |  |  |             | conserved hypothetical protein         |                                                          |
| PA2841 |   |   |   |   |   |   |   |   |   |  |  |  |  |  |  |  |  |  |  |             | probable enoyl-CoA hydratase/isomerase |                                                          |
| PA2849 |   |   |   |   | - | - | - |   |   |  |  |  |  |  |  |  |  |  |  |             | <i>ohrR</i>                            | OhrR                                                     |
| PA2883 | + |   |   |   |   |   |   |   |   |  |  |  |  |  |  |  |  |  |  |             | hypothetical protein                   |                                                          |
| PA2897 |   |   |   | + |   |   | - |   |   |  |  |  |  |  |  |  |  |  |  |             | probable transcriptional regulator     |                                                          |
| PA2915 |   |   |   |   | - |   |   |   |   |  |  |  |  |  |  |  |  |  |  |             | hypothetical protein                   |                                                          |
| PA2920 |   |   |   |   |   |   | - |   |   |  |  |  |  |  |  |  |  |  |  |             | probable chemotaxis transducer         |                                                          |
| PA2937 |   |   |   | + | - | - |   |   |   |  |  |  |  |  |  |  |  |  |  |             | hypothetical protein                   |                                                          |
| PA2939 |   |   |   |   | - | - | - |   |   |  |  |  |  |  |  |  |  |  |  |             | <i>pepB</i>                            | probable aminopeptidase                                  |
| PA3017 | + | + | + |   | - | - |   |   |   |  |  |  |  |  |  |  |  |  |  |             | conserved hypothetical protein         |                                                          |
| PA3032 |   |   |   |   | - | - | - |   |   |  |  |  |  |  |  |  |  |  |  |             | <i>snr1</i>                            | cytochrome c Snr1                                        |
| PA3040 | + | + | + |   |   |   | - |   |   |  |  |  |  |  |  |  |  |  |  |             | conserved hypothetical protein         |                                                          |
| PA3068 |   |   |   |   | - |   | - |   |   |  |  |  |  |  |  |  |  |  |  |             | <i>gdhB</i>                            | NAD-dependent glutamate dehydrogenase                    |
| PA3186 |   |   |   |   | - | - | - |   |   |  |  |  |  |  |  |  |  |  |  |             | <i>oprB</i>                            | Glucose/carbohydrate outer membrane porin OprB precursor |
| PA3187 |   |   |   |   | - | - |   |   |   |  |  |  |  |  |  |  |  |  |  |             | <i>gltK</i>                            | probable ATP-binding component of ABC transporter        |
| PA3188 |   |   |   |   | - | - | - |   |   |  |  |  |  |  |  |  |  |  |  |             | <i>gltG</i>                            | probable permease of ABC sugar transporter               |
| PA3216 |   |   |   |   | - |   | - |   |   |  |  |  |  |  |  |  |  |  |  |             |                                        | hypothetical protein                                     |
| PA3229 |   |   |   | + |   |   |   |   |   |  |  |  |  |  |  |  |  |  |  |             | hypothetical protein                   |                                                          |
| PA3234 |   |   |   | + | - | - |   |   |   |  |  |  |  |  |  |  |  |  |  |             | probable sodium:solute symporter       |                                                          |
| PA3235 |   |   |   | + | - | - |   |   |   |  |  |  |  |  |  |  |  |  |  |             | conserved hypothetical protein         |                                                          |
| PA3311 |   |   |   |   |   |   | - |   |   |  |  |  |  |  |  |  |  |  |  |             | conserved hypothetical protein         |                                                          |
| PA3316 |   |   |   | + | - | - |   |   |   |  |  |  |  |  |  |  |  |  |  |             | probable permease of ABC transporter   |                                                          |
| PA3343 |   |   |   |   | - |   |   |   |   |  |  |  |  |  |  |  |  |  |  |             | hypothetical protein                   |                                                          |
| PA3345 |   |   |   |   | - | - |   |   |   |  |  |  |  |  |  |  |  |  |  |             | hypothetical protein                   |                                                          |



|               |   |   |   |   |   |              |                                               |                                                                 |                                           |
|---------------|---|---|---|---|---|--------------|-----------------------------------------------|-----------------------------------------------------------------|-------------------------------------------|
| PA3346        |   | - | - | - |   | -            | probable two-component response regulator     |                                                                 |                                           |
| PA3347        |   | - | - | - |   | -            | hypothetical protein                          |                                                                 |                                           |
| PA3348        |   |   |   | - |   | <i>cheR1</i> | probable chemotaxis protein methyltransferase |                                                                 |                                           |
| PA3349        |   | + | - | - |   | +            | +                                             | probable chemotaxis protein                                     |                                           |
| PA3351        |   | + |   |   |   | +            | +                                             | <i>flgM</i>                                                     |                                           |
| PA3352        |   | + |   |   |   | +            | +                                             | hypothetical protein                                            |                                           |
| PA3369        |   |   |   | - |   |              | +                                             | hypothetical protein                                            |                                           |
| PA3371        |   | + |   |   |   |              | +                                             | hypothetical protein                                            |                                           |
| <b>PA3415</b> |   | + | + | - |   |              | +                                             | <b>probable dihydrolipoamide acetyltransferase</b>              |                                           |
| <b>PA3416</b> |   |   |   | - | - | -            |                                               | <b>probable pyruvate dehydrogenase E1 component, beta chain</b> |                                           |
| PA3418        |   | + | - | - |   |              | +                                             | +                                                               | <i>ldh</i>                                |
| PA3451        |   | + | - | - |   | +            | +                                             | +                                                               | hypothetical protein                      |
| PA3465        |   |   |   | - |   | -            |                                               |                                                                 | conserved hypothetical protein            |
| <b>PA3477</b> |   |   | - | - | - |              | +                                             | +                                                               | <b><i>rhIR</i></b>                        |
| PA3496        |   | - | - | - | - | -            |                                               |                                                                 | hypothetical protein                      |
| PA3526        |   |   | + | - |   |              | +                                             | +                                                               | probable outer membrane protein precursor |
| PA3568        |   |   |   | - | - | -            |                                               |                                                                 | probable acetyl-coa synthetase            |
| PA3569        | + |   |   | - | - | -            |                                               |                                                                 | <i>mmsB</i>                               |
| PA3570        | + |   |   | - | - | -            |                                               |                                                                 | <i>mmsA</i>                               |
| PA3622        |   |   | + | - | - |              |                                               | +                                                               | <i>rpoS</i>                               |
| PA3628        |   |   |   |   |   |              | +                                             |                                                                 | probable esterase                         |
| PA3629        |   |   |   |   |   |              | +                                             |                                                                 | <i>adhC</i>                               |
| PA3662        |   |   |   | - | - | -            |                                               |                                                                 | hypothetical protein                      |
| PA3674        |   |   |   |   |   | -            |                                               |                                                                 | hypothetical protein                      |
| PA3684        | - | - | + | - | - |              | +                                             | +                                                               | hypothetical protein                      |
| PA3688        | + |   | + | - | - |              | +                                             | +                                                               | hypothetical protein                      |
| PA3723        |   |   |   | - | - | -            |                                               |                                                                 | probable FMN oxidoreductase               |
| PA3724        |   |   |   | - | - | -            |                                               | +                                                               | <i>lasB</i>                               |
| PA3740        |   |   | + |   |   |              |                                               |                                                                 | hypothetical protein                      |
| PA3753        |   |   |   |   |   |              |                                               |                                                                 | conserved hypothetical protein            |
| PA3784        |   |   |   | - |   | -            |                                               |                                                                 | hypothetical protein                      |
| PA3785        |   |   |   | - |   | -            |                                               | -                                                               | conserved hypothetical protein            |
| PA3786        |   |   |   | - | - |              |                                               |                                                                 | hypothetical protein                      |

|        |   |   |   |   |  |  |  |  |  |             |                                                                 |
|--------|---|---|---|---|--|--|--|--|--|-------------|-----------------------------------------------------------------|
| PA3792 |   |   |   |   |  |  |  |  |  | <i>leuA</i> | 2-isopropylmalate synthase                                      |
| PA3833 |   | + |   | - |  |  |  |  |  |             | hypothetical protein                                            |
| PA3846 |   | + |   | - |  |  |  |  |  | -           | hypothetical protein                                            |
| PA3847 |   |   |   | - |  |  |  |  |  | -           | conserved hypothetical protein                                  |
| PA3848 |   |   |   | - |  |  |  |  |  |             | hypothetical protein                                            |
| PA3851 |   | + |   |   |  |  |  |  |  |             | hypothetical protein                                            |
| PA3858 |   |   |   | - |  |  |  |  |  | -           | probable amino acid-binding protein                             |
| PA3922 |   |   |   | - |  |  |  |  |  | -           | conserved hypothetical protein                                  |
| PA3923 |   |   |   | - |  |  |  |  |  |             | hypothetical protein                                            |
| PA3945 |   |   |   | - |  |  |  |  |  | -           | conserved hypothetical protein                                  |
| PA3957 |   |   | + |   |  |  |  |  |  |             | probable short-chain dehydrogenase                              |
| PA3986 |   | + | + |   |  |  |  |  |  |             | hypothetical protein                                            |
| PA4012 |   |   | + |   |  |  |  |  |  |             | hypothetical protein                                            |
| PA4079 |   |   |   | - |  |  |  |  |  | -           | probable dehydrogenase                                          |
| PA4112 |   |   |   | - |  |  |  |  |  | -           | probable sensor/response regulator hybrid                       |
| PA4129 | - | - | - |   |  |  |  |  |  |             | hypothetical protein                                            |
| PA4218 |   |   |   | - |  |  |  |  |  | -           | <i>ampP</i> AmpP                                                |
| PA4219 |   |   |   | - |  |  |  |  |  | -           | hypothetical protein                                            |
| PA4220 | + | + | + |   |  |  |  |  |  | -           | hypothetical protein                                            |
| PA4221 | + |   |   |   |  |  |  |  |  | -           | <i>fptA</i> Fe(III)-pyochelin outer membrane receptor precursor |
| PA4222 |   |   |   |   |  |  |  |  |  | -           | <i>pchI</i> probable ATP-binding component of ABC transporter   |
| PA4223 | + |   |   |   |  |  |  |  |  | -           | <i>pchH</i> probable ATP-binding component of ABC transporter   |
| PA4224 | + |   |   |   |  |  |  |  |  | -           | <i>pchG</i> pyochelin biosynthetic protein PchG                 |
| PA4225 |   |   |   |   |  |  |  |  |  | -           | <i>pchF</i> pyochelin synthetase                                |
| PA4226 |   |   |   |   |  |  |  |  |  | -           | <i>pchE</i> dihydroaeruginosic acid synthetase                  |
| PA4227 | + |   |   |   |  |  |  |  |  | -           | <i>pchR</i> transcriptional regulator PchR                      |
| PA4228 |   |   |   |   |  |  |  |  |  | -           | <i>pchD</i> pyochelin biosynthesis protein PchD                 |
| PA4229 |   |   |   |   |  |  |  |  |  | -           | <i>pchC</i> pyochelin biosynthetic protein PchC                 |
| PA4230 | + |   |   |   |  |  |  |  |  | -           | <i>pchB</i> salicylate biosynthesis protein PchB                |
| PA4231 |   |   |   |   |  |  |  |  |  | -           | <i>pchA</i> salicylate biosynthesis isochorismate synthase      |
| PA4290 |   |   |   |   |  |  |  |  |  |             | probable chemotaxis transducer                                  |
| PA4294 |   | + |   | - |  |  |  |  |  | -           | hypothetical protein                                            |
| PA4296 |   | + |   | - |  |  |  |  |  | -           | <i>pprB</i> two-component response regulator, PprB              |

|        |   |   |   |   |   |   |   |   |   |             |                                                                    |
|--------|---|---|---|---|---|---|---|---|---|-------------|--------------------------------------------------------------------|
| PA4297 |   | - | - | - | - | - | - | - | - | <i>tadG</i> | TadG                                                               |
| PA4298 |   | - | - | - | - | - | - | - | - |             | hypothetical protein                                               |
| PA4299 |   | - | - | - | - | - | - | - | - | <i>tadD</i> | TadD                                                               |
| PA4300 |   | + | - | - | - | - | - | - | - | <i>tadC</i> | TadC                                                               |
| PA4301 |   | - | - | - | - | - | - | - | - | <i>tadB</i> | TadB                                                               |
| PA4302 |   | - | - | - | - | - | - | - | - | <i>tadA</i> | TadA ATPase                                                        |
| PA4303 |   | - | - | - | - | - | - | - | - | <i>tadZ</i> | TadZ                                                               |
| PA4304 |   | - | - | - | - | - | - | - | - | <i>rcpA</i> | RcpA                                                               |
| PA4305 |   | + | - | - | - | - | + | + | - | <i>rcpC</i> | RcpC                                                               |
| PA4306 | - | + | - | - | - | - | + | + | - | <i>flp</i>  | Type IVb pilin, Flp                                                |
| PA4311 |   |   |   |   |   |   |   |   | - |             | conserved hypothetical protein                                     |
| PA4315 | - | - |   | - |   |   |   |   | - | <i>mvaT</i> | transcriptional regulator MvaT, P16 subunit                        |
| PA4324 | - | - |   | - | - |   | + | + |   |             | hypothetical protein                                               |
| PA4377 |   |   |   | - | - |   |   | + | - |             | hypothetical protein                                               |
| PA4410 |   |   |   |   |   |   |   | - | - | <i>ddlB</i> | D-alanine--D-alanine ligase                                        |
| PA4411 |   |   |   |   |   |   |   |   | - | <i>murC</i> | UDP-N-acetylmuramate--alanine ligase                               |
| PA4412 |   |   |   |   |   |   |   |   |   | <i>murG</i> | UDP-N-acetylglucosamine--N-acetylmuramyl-(pentapeptide)            |
| PA4414 |   |   |   |   |   |   | - |   |   | <i>murD</i> | UDP-N-acetylmuramoylalanine--D-glutamate ligase                    |
| PA4415 |   | - |   |   |   |   |   |   |   | <i>mraY</i> | phospho-N-acetylmuramoyl-pentapeptide-transferase                  |
| PA4417 |   |   |   |   |   |   |   |   | - | <i>murE</i> | UDP-N-acetylmuramoylalanyl-D-glutamate-2, 6-diaminopimelate ligase |
| PA4418 |   |   |   |   |   |   |   |   | - | <i>ftsI</i> | penicillin-binding protein 3                                       |
| PA4420 |   |   |   |   |   |   |   |   |   |             | conserved hypothetical protein                                     |
| PA4474 | + |   |   |   |   |   |   |   | - |             | conserved hypothetical protein                                     |
| PA4507 |   |   |   |   |   |   |   |   | - |             | hypothetical protein                                               |
| PA4572 |   | + | - | - | - | - | + | + | - | <i>fkIB</i> | peptidyl-prolyl cis-trans isomerase FklB                           |
| PA4573 |   | + | - | - | - | - | + | + | - |             | hypothetical protein                                               |
| PA4590 |   |   | - | - | - | - | + | + | - | <i>pra</i>  | protein activator                                                  |
| PA4607 |   |   | - | - | - | - |   |   | - |             | hypothetical protein                                               |
| PA4608 |   | + | + | - | - | - | + | + | - |             | hypothetical protein                                               |
| PA4611 |   |   | + | - | - | - |   |   | - |             | hypothetical protein                                               |
| PA4633 |   |   | + | - |   |   | + |   | - |             | probable chemotaxis transducer                                     |
| PA4641 |   |   | - | - | - | - |   |   | - |             | still frameshift hypothetical protein                              |
| PA4648 |   |   | - | - | - | - |   |   | - |             | hypothetical protein                                               |



|        |  |  |  |   |   |   |  |  |   |                                                           |
|--------|--|--|--|---|---|---|--|--|---|-----------------------------------------------------------|
| PA5208 |  |  |  | - | - | - |  |  | - | conserved hypothetical protein                            |
| PA5213 |  |  |  | - | - | - |  |  | - | <i>gcvP1</i> glycine cleavage system protein P1           |
| PA5214 |  |  |  | - |   |   |  |  | - | <i>gcvH1</i> glycine cleavage system protein H1           |
| PA5245 |  |  |  |   |   |   |  |  | - | conserved hypothetical protein                            |
| PA5253 |  |  |  |   |   |   |  |  | - | <i>algP</i> alginate regulatory protein AlgP              |
| PA5255 |  |  |  |   |   |   |  |  | - | <i>algQ</i> Alginate regulatory protein AlgQ              |
| PA5261 |  |  |  |   |   |   |  |  | - | <i>algR</i> alginate biosynthesis regulatory protein AlgR |
| PA5301 |  |  |  |   |   |   |  |  |   | probable transcriptional regulator                        |
| PA5348 |  |  |  |   |   |   |  |  |   | probable DNA-binding protein                              |
| PA5350 |  |  |  |   |   |   |  |  |   | <i>rubA2</i> Rubredoxin 2                                 |
| PA5359 |  |  |  |   |   |   |  |  |   | hypothetical protein                                      |
| PA5424 |  |  |  |   |   |   |  |  |   | conserved hypothetical protein                            |
| PA5482 |  |  |  |   |   |   |  |  |   | hypothetical protein                                      |
| PA5527 |  |  |  |   |   |   |  |  |   | hypothetical protein                                      |
| PA5543 |  |  |  |   |   |   |  |  |   | hypothetical protein                                      |
| PA5545 |  |  |  |   |   |   |  |  |   | conserved hypothetical protein                            |
| PA5546 |  |  |  |   |   |   |  |  |   | conserved hypothetical protein                            |
