# Supplementary material for: In-Vivo Expression Profiling of Pseudomonas aeruginosa Infections Reveals Niche-Specific and Strain-Independent Transcriptional Programs
Source: PubMed Central journal article supplement (PMC3171414; doi:10.1371/journal.pone.0024235), 2011-09-12
Supplement: pone.0024235.s011.pdf [file pone.0024235.s011.pdf]

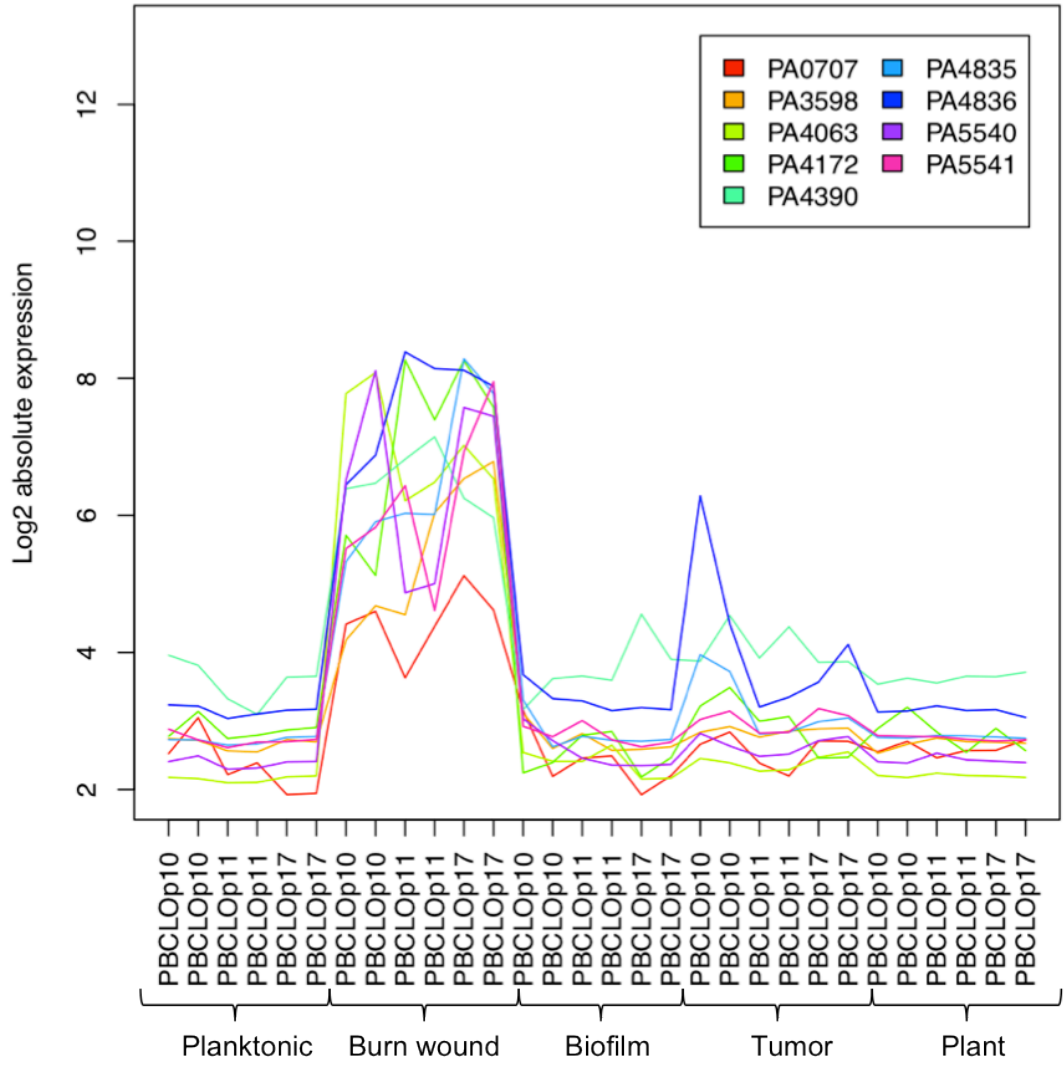

Figure S2
